# Supplementary material for: Dramatic Declines of Montane Frogs in a Central African Biodiversity Hotspot
Source: PLoS One. 2016 May 5;11(5):e0155129. doi: 10.1371/journal.pone.0155129 (PMC4858272; doi:10.1371/journal.pone.0155129)
Supplement: S2 Table — Field-collected and museum samples from Cameroon tested for Bd. Given is an identification number (Museums Catalogue or Field Number), species identity, year of collection, screening results (positive or negative, zoospore equivalent, ZE and genomic equivalent, GE), and collection site. Individuals tested positive are highlighted in yellow. (XLSX) [file pone.0155129.s004.xlsx]

## Sheet: Tabelle1
S2 Table. Chronology of Bd records and infection load. Field-collected and museum samples from Cameroon tested for Bd. Given is an identification number (Museums Catalogue or Field Number), species identity, year of collection, screening results (positive or negative, zoospore equivalent, ZE and genomic equivalent, GE), and collection site. Individuals tested positive are highlighted in yellow.
Identification number		Species identity			Year of collection	Screening results			Collection site
Museum Catalog Number	Field Number	Family	Genus	species		Positive/Negative	ZE	Qty (GE)	Country	Province	Locality
MCZ A-2665		Arthroleptidae	Leptopelis	rufus	1908	Negative			Cameroon	South	Kribi
MCZ A-21549		Arthroleptidae	Leptopelis	boulengeri	1910	Negative			Cameroon	South	Kribi
MCZ A-3429		Arthroleptidae	Arthroleptis	variabilis	1911	Negative			Cameroon	South	Lolodorf
MCZ A-3438		Hyperoliidae	Afrixalus	fulvovittatus	1911	Negative			Cameroon	South	Lolodorf
MCZ A-3439		Hyperoliidae	Afrixalus	fulvovittatus	1911	Negative			Cameroon	South	Lolodorf
MCZ A-3450		Phrynobatrachidae	Phrynobatrachus	elberti	1911	Negative			Cameroon	South	Lolodorf
MCZ A-15048		Hyperoliidae	Acanthixalus	spinosus	1930	Negative			Cameroon	East	Bitye, Dja River
MCZ A-17626		Hyperoliidae	Hyperolius	ademetzi	1930	Negative			Cameroon	Northwest	Bamenda
MCZ A-2649		Hyperoliidae	Hyperolius	ocellatus	1930	Negative			Cameroon	East	Bitye, Dja River
MCZ A-17638		Hyperoliidae	Hyperolius	riggenbachi	1930	Negative			Cameroon	Northwest	Bamenda
MCZ A-11642		Hyperoliidae	Hyperolius	tuberculatus	1930	Negative			Cameroon	East	Bitye, Dja River
MCZ A-2609		Phrynobatrachidae	Phrynobatrachus	auritus	1930	Negative			Cameroon	East	Bitye, Dja River
MCZ A-28352		Bufonidae	Amietophrynus	villiersi	1952	Negative			Cameroon	Northwest	Bamenda
MCZ A-28353		Bufonidae	Amietophrynus	villiersi	1952	Negative			Cameroon	Northwest	Bamenda
MCZ A-28354		Bufonidae	Amietophrynus	villiersi	1952	Negative			Cameroon	Northwest	Bamenda
MCZ A-28356		Bufonidae	Amietophrynus	villiersi	1952	Negative			Cameroon	Northwest	Bamenda
MCZ A-31572		Phrynobatrachidae	Phrynobatrachus	cricogaster	1959	Negative			Cameroon	Littoral	Nsoung
MCZ A-31573		Phrynobatrachidae	Phrynobatrachus	cricogaster	1959	Negative			Cameroon	Littoral	Nsoung
CAS 158964		Arthroleptidae	Arthroleptis	sylvaticus	1960	Negative			Cameroon	South	Sangmelima forest
CAS 158965		Arthroleptidae	Arthroleptis	sylvaticus	1960	Negative			Cameroon	South	Sangmelima forest
CAS 158974		Arthroleptidae	Cardioglossa	escalerae	1960	Positive	4.064	0.0508	Cameroon	South	Sangmelima forest
CAS 158973		Arthroleptidae	Cardioglossa	gracilis	1960	Negative			Cameroon	South	Sangmelima
CAS 153806		Arthroleptidae	Leptopelis	brevirostris	1960	Negative			Cameroon	South	Sangmelima, Foulassi, Ngam
CAS 153801		Phrynobatrachidae	Phrynobatrachus	africanus	1960	Negative			Cameroon	South	Sangmelima, Foulassi, Ngam
CAS 153802		Phrynobatrachidae	Phrynobatrachus	africanus	1960	Negative			Cameroon	South	Sangmelima, Foulassi, Ngam
CAS 158976		Phrynobatrachidae	Phrynobatrachus	cricogaster	1960	Negative			Cameroon	Littoral	Manengouba, Nsoung
CAS 158977		Phrynobatrachidae	Phrynobatrachus	cricogaster	1960	Negative			Cameroon	Littoral	Manengouba, Nsoung
CAS 158969		Arthroleptidae	Arthroleptis	taeniatus	1961	Negative			Cameroon	South	Sangmelima
CAS 158970		Arthroleptidae	Arthroleptis	taeniatus	1961	Negative			Cameroon	South	Sangmelima
CAS 153807		Arthroleptidae	Leptopelis	brevirostris	1961	Negative			Cameroon	South	Sangmelima, Foulassi, Ngam
CAS 153799		Hyperoliidae	Acanthixalus	spinosus	1961	Negative			Cameroon	South	Sangmelima, Foulassi, Ngam
CAS 153800		Hyperoliidae	Acanthixalus	spinosus	1961	Negative			Cameroon	South	Sangmelima, Foulassi, Ngam
CAS 153798		Hyperoliidae	Opisthothylax	immaculatus	1961	Negative			Cameroon	South	Sangmelima, Foulassi, Ngam
CAS 103886		Arthroleptidae	Arthroleptis	cf. tuberosus	1966	Negative			Cameroon	South	20 mi N Lolodorf
CAS 103972		Arthroleptidae	Arthroleptis	poecilonotus	1966	Negative			Cameroon	South	Lolodorf
CAS 103973		Arthroleptidae	Arthroleptis	poecilonotus	1966	Negative			Cameroon	South	Lolodorf
CAS 103895		Arthroleptidae	Arthroleptis	sylvaticus	1966	Negative			Cameroon	South	20 mi N Lolodorf
CAS 103896		Arthroleptidae	Arthroleptis	sylvaticus	1966	Negative			Cameroon	South	20 mi N Lolodorf
CAS 103897		Arthroleptidae	Arthroleptis	sylvaticus	1966	Negative			Cameroon	South	20 mi N Lolodorf
CAS 103898		Arthroleptidae	Arthroleptis	sylvaticus	1966	Negative			Cameroon	South	20 mi N Lolodorf
CAS 103899		Arthroleptidae	Arthroleptis	sylvaticus	1966	Negative			Cameroon	South	20 mi N Lolodorf
CAS 103900		Arthroleptidae	Arthroleptis	sylvaticus	1966	Negative			Cameroon	South	20 mi N Lolodorf
CAS 103902		Arthroleptidae	Arthroleptis	sylvaticus	1966	Negative			Cameroon	South	20 mi N Lolodorf
CAS 103903		Arthroleptidae	Arthroleptis	sylvaticus	1966	Negative			Cameroon	South	20 mi N Lolodorf
CAS 103904		Arthroleptidae	Arthroleptis	sylvaticus	1966	Negative			Cameroon	South	20 mi N Lolodorf
CAS 103905		Arthroleptidae	Arthroleptis	sylvaticus	1966	Negative			Cameroon	South	20 mi N Lolodorf
CAS 103906		Arthroleptidae	Arthroleptis	sylvaticus	1966	Negative			Cameroon	South	20 mi N Lolodorf
CAS 103907		Arthroleptidae	Arthroleptis	sylvaticus	1966	Negative			Cameroon	South	20 mi N Lolodorf
CAS 103350		Arthroleptidae	Scotobleps	gabonicus	1966	Negative			Cameroon	South	20 mi N Lolodorf
CAS 103960		Bufonidae	Amietophrynus	camerunensis	1966	Negative			Cameroon	South	Lolodorf
CAS 103961		Bufonidae	Amietophrynus	superciliaris	1966	Negative			Cameroon	South	Lolodorf
CAS 103962		Bufonidae	Amietophrynus	superciliaris	1966	Negative			Cameroon	South	Lolodorf
CAS 103963		Bufonidae	Amietophrynus	superciliaris	1966	Negative			Cameroon	South	Lolodorf
CAS 103964		Bufonidae	Amietophrynus	superciliaris	1966	Negative			Cameroon	South	Lolodorf
CAS 103965		Bufonidae	Amietophrynus	superciliaris	1966	Negative			Cameroon	South	Lolodorf
CAS 103966		Bufonidae	Amietophrynus	superciliaris	1966	Negative			Cameroon	South	Lolodorf
CAS 103967		Bufonidae	Amietophrynus	superciliaris	1966	Negative			Cameroon	South	Lolodorf
CAS 103353		Bufonidae	Amietophrynus	tuberosus	1966	Negative			Cameroon	South	20 mi N Lolodorf
CAS 103971		Hyperoliidae	Afrixalus	paradorsalis	1966	Negative			Cameroon	South	Lolodorf
CAS 103344		Ptychadenidae	Ptychadena	mascareniensis	1966	Negative			Cameroon	South	20 mi N Lolodorf
CAS 103345		Ptychadenidae	Ptychadena	mascareniensis	1966	Negative			Cameroon	South	20 mi N Lolodorf
CAS 103346		Ptychadenidae	Ptychadena	mascareniensis	1966	Negative			Cameroon	South	20 mi N Lolodorf
CAS 103347		Ptychadenidae	Ptychadena	oxyrhynchus	1966	Negative			Cameroon	South	20 mi N Lolodorf
CAS 103969		Ptychadenidae	Ptychadena	superciliaris	1966	Negative			Cameroon	South	Lolodorf
CAS 103970		Ptychadenidae	Ptychadena	superciliaris	1966	Negative			Cameroon	South	Lolodorf
CAS 125586		Arthroleptidae	Astylosternus	montanus	1970	Negative			Cameroon	Northwest	Bamenda
CAS 125591		Hyperoliidae	Hyperolius	sp.	1970	Negative			Cameroon	Northwest	Bamenda
CAS 125582		Petropedetidae	Petropedetes	cf. parkeri	1970	Negative			Cameroon	Northwest	Bamenda
CAS 125583		Petropedetidae	Petropedetes	cf. parkeri	1970	Negative			Cameroon	Northwest	Bamenda
CAS 125584		Petropedetidae	Petropedetes	cf. vulpiae	1970	Negative			Cameroon	Northwest	Bamenda
CAS 125585		Petropedetidae	Petropedetes	cf. vulpiae	1970	Negative			Cameroon	Northwest	Bamenda
CAS 125588		Phrynobatrachidae	Phrynobatrachus	sp.	1970	Negative			Cameroon	Northwest	Bamenda
CAS 125589		Phrynobatrachidae	Phrynobatrachus	sp.	1970	Negative			Cameroon	Northwest	Bamenda
CAS 125590		Phrynobatrachidae	Phrynobatrachus	sp.	1970	Negative			Cameroon	Northwest	Bamenda
CAS 153793		Arthroleptidae	Leptodactylodon	ventrimarmoratus	1972	Negative			Cameroon	Center	Mt. Kala, Yaounde
CAS 153794		Arthroleptidae	Leptodactylodon	ventrimarmoratus	1972	Negative			Cameroon	Center	Mt. Kala, Yaounde
CAS 153797		Arthroleptidae	Nyctibates	corrugatus	1972	Negative			Cameroon	Littoral	Bakaka Forest Reserve
CAS 153804		Phrynobatrachidae	Phrynobatrachus	sandersoni	1972	Negative			Cameroon	Center	Mt. Kala, Yaounde
CAS 153805		Phrynobatrachidae	Phrynobatrachus	sandersoni	1973	Negative			Cameroon	Center	Yaounde, Kala
MCZ A-101156		Bufonidae	Nectophryne	afra	1980	Negative			Cameroon	Southwest	SW Province: Mundemba
MCZ A-101157		Bufonidae	Nectophryne	afra	1980	Negative			Cameroon	Southwest	SW Province: Mundemba
MCZ A-101158		Bufonidae	Nectophryne	afra	1980	Negative			Cameroon	Southwest	SW Province: Mundemba
MCZ A-101159		Bufonidae	Nectophryne	afra	1980	Negative			Cameroon	Southwest	SW Province: Mundemba
CAS 153563		Arthroleptidae	Arthroleptis	poecilonotus	1981	Negative			Cameroon	South	Nyabessan, 157 km S.W. Ebolowa
CAS 153564		Arthroleptidae	Arthroleptis	poecilonotus	1981	Negative			Cameroon	South	Nyabessan, 157 km S.W. Ebolowa
CAS 153628		Bufonidae	Amietophrynus	camerunensis	1981	Negative			Cameroon	South	Avundi, 35 km NW Ebolowa
CAS 153627		Bufonidae	Amietophrynus	regularis	1981	Negative			Cameroon	South	Avundi, 35 km NW Ebolowa
CAS 154369		Hyperoliidae	Afrixalus	dorsalis	1981	Negative			Cameroon	South	7 km ESE (by road) of Ebolowa
CAS 153618		Hyperoliidae	Afrixalus	fulvovittatus brevipalmatus	1981	Negative			Cameroon	South	Ebolowa
CAS 153617		Hyperoliidae	Hyperolius	albolabris	1981	Negative			Cameroon	South	Avundi: 35 km NW Ebolowa
CAS 153566		Hyperoliidae	Hyperolius	sp.	1981	Negative			Cameroon	South	Ebolowa
CAS 153567		Hyperoliidae	Hyperolius	sp.	1981	Negative			Cameroon	South	Ebolowa
CAS 153599		Pipidae	Hymenochirus	boettgeri	1981	Negative			Cameroon	South	Avundi: 35 km NW Ebolowa
CAS 153600		Pipidae	Hymenochirus	boettgeri	1981	Negative			Cameroon	South	Avundi: 35 km NW Ebolowa
CAS 153601		Pipidae	Hymenochirus	boettgeri	1981	Negative			Cameroon	South	Avundi: 35 km NW Ebolowa
CAS 153602		Pipidae	Hymenochirus	boettgeri	1981	Negative			Cameroon	South	Avundi: 35 km NW Ebolowa
CAS 153603		Pipidae	Hymenochirus	boettgeri	1981	Negative			Cameroon	South	Avundi: 35 km NW Ebolowa
CAS 153604		Pipidae	Hymenochirus	boettgeri	1981	Negative			Cameroon	South	Avundi: 35 km NW Ebolowa
CAS 153605		Pipidae	Hymenochirus	boettgeri	1981	Negative			Cameroon	South	Avundi: 35 km NW Ebolowa
CAS 153606		Pipidae	Hymenochirus	boettgeri	1981	Negative			Cameroon	South	Avundi: 35 km NW Ebolowa
CAS 153607		Pipidae	Hymenochirus	boettgeri	1981	Negative			Cameroon	South	Avundi: 35 km NW Ebolowa
CAS 153608		Pipidae	Hymenochirus	boettgeri	1981	Negative			Cameroon	South	Avundi: 35 km NW Ebolowa
CAS 153609		Pipidae	Hymenochirus	boettgeri	1981	Negative			Cameroon	South	Avundi: 35 km NW Ebolowa
CAS 153610		Pipidae	Hymenochirus	boettgeri	1981	Negative			Cameroon	South	Avundi: 35 km NW Ebolowa
CAS 153611		Pipidae	Hymenochirus	boettgeri	1981	Negative			Cameroon	South	Avundi: 35 km NW Ebolowa
CAS 153612		Pipidae	Hymenochirus	boettgeri	1981	Negative			Cameroon	South	Avundi: 35 km NW Ebolowa
CAS 153619		Pipidae	Hymenochirus	boettgeri	1981	Negative			Cameroon	South	157 km SW Ebolowa, vicinity of Nyabessan
CAS 153581		Pipidae	Xenopus	fraseri	1981	Negative			Cameroon	South	Avundi: 35 km NW Ebolowa
CAS 153582		Pipidae	Xenopus	fraseri	1981	Negative			Cameroon	South	Avundi: 35 km NW Ebolowa
CAS 153583		Pipidae	Xenopus	fraseri	1981	Negative			Cameroon	South	Avundi: 35 km NW Ebolowa
CAS 153584		Pipidae	Xenopus	fraseri	1981	Negative			Cameroon	South	Avundi: 35 km NW Ebolowa
CAS 153585		Pipidae	Xenopus	fraseri	1981	Negative			Cameroon	South	Avundi: 35 km NW Ebolowa
CAS 153586		Pipidae	Xenopus	fraseri	1981	Negative			Cameroon	South	Avundi: 35 km NW Ebolowa
CAS 153587		Pipidae	Xenopus	fraseri	1981	Negative			Cameroon	South	Avundi: 35 km NW Ebolowa
CAS 153588		Pipidae	Xenopus	fraseri	1981	Negative			Cameroon	South	Avundi: 35 km NW Ebolowa
CAS 153589		Pipidae	Xenopus	fraseri	1981	Negative			Cameroon	South	Avundi: 35 km NW Ebolowa
CAS 153590		Pipidae	Xenopus	fraseri	1981	Negative			Cameroon	South	Avundi: 35 km NW Ebolowa
CAS 153591		Pipidae	Xenopus	fraseri	1981	Negative			Cameroon	South	Avundi: 35 km NW Ebolowa
CAS 153592		Pipidae	Xenopus	fraseri	1981	Negative			Cameroon	South	Avundi: 35 km NW Ebolowa
CAS 153593		Pipidae	Xenopus	fraseri	1981	Negative			Cameroon	South	Avundi: 35 km NW Ebolowa
CAS 153594		Pipidae	Xenopus	fraseri	1981	Negative			Cameroon	South	Avundi: 35 km NW Ebolowa
CAS 153595		Pipidae	Xenopus	fraseri	1981	Negative			Cameroon	South	Avundi: 35 km NW Ebolowa
CAS 153596		Pipidae	Xenopus	fraseri	1981	Negative			Cameroon	South	Avundi: 35 km NW Ebolowa
CAS 153597		Pipidae	Xenopus	fraseri	1981	Negative			Cameroon	South	Avundi: 35 km NW Ebolowa
CAS 153598		Pipidae	Xenopus	fraseri	1981	Negative			Cameroon	South	Avundi: 35 km NW Ebolowa
CAS 153561		Ptychadenidae	Ptychadena	bibroni	1981	Negative			Cameroon	South	Nyabessan, 157 km S.W. Ebolowa
CAS 153562		Ptychadenidae	Ptychadena	bibroni	1981	Negative			Cameroon	South	Nyabessan, 157 km S.W. Ebolowa
CAS 153568		Ptychadenidae	Ptychadena	mascareniensis	1981	Negative			Cameroon	South	Ebolowa
CAS 153569		Ptychadenidae	Ptychadena	mascareniensis	1981	Negative			Cameroon	South	Ebolowa
CAS 153570		Ptychadenidae	Ptychadena	mascareniensis	1981	Negative			Cameroon	South	Ebolowa
CAS 153571		Ptychadenidae	Ptychadena	mascareniensis	1981	Negative			Cameroon	South	Ebolowa
CAS 199334		Arthroleptidae	Arthroleptis	cf. adelphus	1994	Negative			Cameroon	East	Dja Reserve, Boumir Camp
CAS 199337		Arthroleptidae	Arthroleptis	cf. variabilis	1994	Negative			Cameroon	East	Dja Reserve, Boumir Camp
CAS 199338		Arthroleptidae	Arthroleptis	cf. variabilis	1994	Negative			Cameroon	East	Dja Reserve, Boumir Camp
CAS 197889		Arthroleptidae	Arthroleptis	poecilonotus	1994	Negative			Cameroon	East	Dja Reserve, edge of Boumir Rochette
CAS 197890		Arthroleptidae	Arthroleptis	poecilonotus	1994	Negative			Cameroon	East	Dja Reserve, edge of Boumir Rochette
CAS 199356		Arthroleptidae	Arthroleptis	poecilonotus	1994	Negative			Cameroon	East	Dja Reserve, Boumir Camp
CAS 199357		Arthroleptidae	Arthroleptis	poecilonotus	1994	Negative			Cameroon	East	Dja Reserve, Boumir Camp
CAS 199358		Arthroleptidae	Arthroleptis	poecilonotus	1994	Negative			Cameroon	East	Dja Reserve, Boumir Camp
CAS 199359		Arthroleptidae	Arthroleptis	poecilonotus	1994	Negative			Cameroon	East	Dja Reserve, Boumir Camp
CAS 199333		Arthroleptidae	Arthroleptis	sylvaticus	1994	Negative			Cameroon	East	Dja Reserve, Boumir Camp
CAS 199360		Arthroleptidae	Arthroleptis	sylvaticus	1994	Negative			Cameroon	East	Dja Reserve, Boumir Camp
CAS 199361		Arthroleptidae	Arthroleptis	sylvaticus	1994	Negative			Cameroon	East	Dja Reserve, Boumir Camp
CAS 199362		Arthroleptidae	Arthroleptis	sylvaticus	1994	Negative			Cameroon	East	Dja Reserve, Boumir Camp
CAS 199363		Arthroleptidae	Arthroleptis	sylvaticus	1994	Negative			Cameroon	East	Dja Reserve, Boumir Camp
CAS 199364		Arthroleptidae	Arthroleptis	sylvaticus	1994	Negative			Cameroon	East	Dja Reserve, Boumir Camp
CAS 199365		Arthroleptidae	Arthroleptis	sylvaticus	1994	Negative			Cameroon	East	Dja Reserve, Boumir Camp
CAS 199366		Arthroleptidae	Arthroleptis	sylvaticus	1994	Negative			Cameroon	East	Dja Reserve, Boumir Camp
CAS 199367		Arthroleptidae	Arthroleptis	sylvaticus	1994	Negative			Cameroon	East	Dja Reserve, Boumir Camp
CAS 199368		Arthroleptidae	Arthroleptis	sylvaticus	1994	Negative			Cameroon	East	Dja Reserve, Boumir Camp
CAS 199149		Arthroleptidae	Arthroleptis	variabilis	1994	Negative			Cameroon	East	Dja Reserve, Boumir Camp
CAS 199150		Arthroleptidae	Arthroleptis	variabilis	1994	Negative			Cameroon	East	Dja Reserve, Boumir Camp
CAS 199151		Arthroleptidae	Arthroleptis	variabilis	1994	Negative			Cameroon	East	Dja Reserve, Boumir Camp
CAS 199152		Arthroleptidae	Arthroleptis	variabilis	1994	Negative			Cameroon	East	Dja Reserve, Boumir Camp
CAS 199153		Arthroleptidae	Arthroleptis	variabilis	1994	Negative			Cameroon	East	Dja Reserve, Boumir Camp
CAS 199154		Arthroleptidae	Arthroleptis	variabilis	1994	Negative			Cameroon	East	Dja Reserve, Boumir Camp
CAS 199155		Arthroleptidae	Arthroleptis	variabilis	1994	Negative			Cameroon	East	Dja Reserve, Boumir Camp
CAS 199156		Arthroleptidae	Arthroleptis	variabilis	1994	Negative			Cameroon	East	Dja Reserve, Boumir Camp
CAS 199300		Arthroleptidae	Leptopelis	calcaratus	1994	Negative			Cameroon	East	Dja Reserve, Boumir Camp
CAS 199301		Arthroleptidae	Leptopelis	calcaratus	1994	Negative			Cameroon	East	Dja Reserve, Boumir Camp
CAS 199302		Arthroleptidae	Leptopelis	calcaratus	1994	Negative			Cameroon	East	Dja Reserve, Boumir Camp
CAS 199136		Bufonidae	Amietophrynus	camerunensis	1994	Negative			Cameroon	East	Dja Reserve, Boumir Camp
CAS 199137		Bufonidae	Amietophrynus	camerunensis	1994	Negative			Cameroon	East	Dja Reserve, Boumir Camp
CAS 199138		Bufonidae	Amietophrynus	camerunensis	1994	Negative			Cameroon	East	Dja Reserve, Boumir Camp
CAS 199139		Bufonidae	Amietophrynus	camerunensis	1994	Negative			Cameroon	East	Dja Reserve, Boumir Camp
CAS 199140		Bufonidae	Amietophrynus	camerunensis	1994	Negative			Cameroon	East	Dja Reserve, Boumir Camp
CAS 199141		Bufonidae	Amietophrynus	camerunensis	1994	Negative			Cameroon	East	Dja Reserve, Boumir Camp
CAS 199142		Bufonidae	Amietophrynus	camerunensis	1994	Negative			Cameroon	East	Dja Reserve, Boumir Camp
CAS 199143		Bufonidae	Amietophrynus	camerunensis	1994	Negative			Cameroon	East	Dja Reserve, Boumir Camp
CAS 199144		Bufonidae	Amietophrynus	camerunensis	1994	Negative			Cameroon	East	Dja Reserve, Boumir Camp
CAS 199145		Bufonidae	Amietophrynus	camerunensis	1994	Negative			Cameroon	East	Dja Reserve, Boumir Camp
CAS 199146		Bufonidae	Amietophrynus	camerunensis	1994	Negative			Cameroon	East	Dja Reserve, Boumir Camp
CAS 199147		Bufonidae	Amietophrynus	sp.	1994	Negative			Cameroon	East	Dja Reserve, Boumir Camp
CAS 199148		Bufonidae	Amietophrynus	sp.	1994	Negative			Cameroon	East	Dja Reserve, Boumir Camp
CAS 199199		Hyperoliidae	Afrixalus	fulvovittatus	1994	Negative			Cameroon	East	Dja Reserve, Boumir Camp
CAS 199200		Hyperoliidae	Afrixalus	fulvovittatus	1994	Negative			Cameroon	East	Dja Reserve, Boumir Camp
CAS 199201		Hyperoliidae	Afrixalus	fulvovittatus	1994	Negative			Cameroon	East	Dja Reserve, Boumir Camp
CAS 199202		Hyperoliidae	Afrixalus	fulvovittatus	1994	Negative			Cameroon	East	Dja Reserve, Boumir Camp
CAS 199203		Hyperoliidae	Afrixalus	fulvovittatus	1994	Negative			Cameroon	East	Dja Reserve, Boumir Camp
CAS 199204		Hyperoliidae	Afrixalus	fulvovittatus	1994	Negative			Cameroon	East	Dja Reserve, Boumir Camp
CAS 199205		Hyperoliidae	Afrixalus	fulvovittatus	1994	Negative			Cameroon	East	Dja Reserve, Boumir Camp
CAS 199206		Hyperoliidae	Afrixalus	fulvovittatus	1994	Negative			Cameroon	East	Dja Reserve, Boumir Camp
CAS 199355		Hyperoliidae	Hyperolius	cinnamomeoventris	1994	Negative			Cameroon	East	Dja Reserve, Boumir Camp
CAS 199193		Hyperoliidae	Hyperolius	ocellatus	1994	Negative			Cameroon	East	Dja Reserve, Boumir Camp
CAS 199194		Hyperoliidae	Hyperolius	ocellatus	1994	Negative			Cameroon	East	Dja Reserve, Boumir Camp
CAS 199195		Hyperoliidae	Hyperolius	ocellatus	1994	Negative			Cameroon	East	Dja Reserve, Boumir Camp
CAS 199207		Hyperoliidae	Hyperolius	ocellatus	1994	Negative			Cameroon	East	Dja Reserve, Boumir Camp
CAS 199208		Hyperoliidae	Hyperolius	ocellatus	1994	Negative			Cameroon	East	Dja Reserve, Boumir Camp
CAS 199209		Hyperoliidae	Hyperolius	ocellatus	1994	Negative			Cameroon	East	Dja Reserve, Boumir Camp
CAS 199210		Hyperoliidae	Hyperolius	ocellatus	1994	Negative			Cameroon	East	Dja Reserve, Boumir Camp
CAS 199211		Hyperoliidae	Hyperolius	ocellatus	1994	Negative			Cameroon	East	Dja Reserve, Boumir Camp
CAS 199212		Hyperoliidae	Hyperolius	ocellatus	1994	Negative			Cameroon	East	Dja Reserve, Boumir Camp
CAS 199213		Hyperoliidae	Hyperolius	ocellatus	1994	Negative			Cameroon	East	Dja Reserve, Boumir Camp
CAS 199214		Hyperoliidae	Hyperolius	ocellatus	1994	Negative			Cameroon	East	Dja Reserve, Boumir Camp
CAS 199215		Hyperoliidae	Hyperolius	ocellatus	1994	Negative			Cameroon	East	Dja Reserve, Boumir Camp
CAS 199216		Hyperoliidae	Hyperolius	ocellatus	1994	Negative			Cameroon	East	Dja Reserve, Boumir Camp
CAS 199217		Hyperoliidae	Hyperolius	ocellatus	1994	Negative			Cameroon	East	Dja Reserve, Boumir Camp
CAS 199218		Hyperoliidae	Hyperolius	ocellatus	1994	Negative			Cameroon	East	Dja Reserve, Boumir Camp
CAS 199219		Hyperoliidae	Hyperolius	ocellatus	1994	Negative			Cameroon	East	Dja Reserve, Boumir Camp
CAS 199220		Hyperoliidae	Hyperolius	ocellatus	1994	Negative			Cameroon	East	Dja Reserve, Boumir Camp
CAS 199221		Hyperoliidae	Hyperolius	ocellatus	1994	Negative			Cameroon	East	Dja Reserve, Boumir Camp
CAS 199222		Hyperoliidae	Hyperolius	ocellatus	1994	Negative			Cameroon	East	Dja Reserve, Boumir Camp
CAS 199223		Hyperoliidae	Hyperolius	ocellatus	1994	Negative			Cameroon	East	Dja Reserve, Boumir Camp
CAS 199224		Hyperoliidae	Hyperolius	ocellatus	1994	Negative			Cameroon	East	Dja Reserve, Boumir Camp
CAS 199225		Hyperoliidae	Hyperolius	ocellatus	1994	Negative			Cameroon	East	Dja Reserve, Boumir Camp
CAS 199226		Hyperoliidae	Hyperolius	ocellatus	1994	Negative			Cameroon	East	Dja Reserve, Boumir Camp
CAS 199227		Hyperoliidae	Hyperolius	ocellatus	1994	Negative			Cameroon	East	Dja Reserve, Boumir Camp
CAS 199228		Hyperoliidae	Hyperolius	ocellatus	1994	Negative			Cameroon	East	Dja Reserve, Boumir Camp
CAS 199229		Hyperoliidae	Hyperolius	ocellatus	1994	Negative			Cameroon	East	Dja Reserve, Boumir Camp
CAS 199230		Hyperoliidae	Hyperolius	ocellatus	1994	Negative			Cameroon	East	Dja Reserve, Boumir Camp
CAS 199231		Hyperoliidae	Hyperolius	ocellatus	1994	Negative			Cameroon	East	Dja Reserve, Boumir Camp
CAS 199232		Hyperoliidae	Hyperolius	ocellatus	1994	Negative			Cameroon	East	Dja Reserve, Boumir Camp
CAS 199233		Hyperoliidae	Hyperolius	ocellatus	1994	Negative			Cameroon	East	Dja Reserve, Boumir Camp
CAS 199234		Hyperoliidae	Hyperolius	ocellatus	1994	Negative			Cameroon	East	Dja Reserve, Boumir Camp
CAS 199235		Hyperoliidae	Hyperolius	ocellatus	1994	Negative			Cameroon	East	Dja Reserve, Boumir Camp
CAS 199236		Hyperoliidae	Hyperolius	ocellatus	1994	Negative			Cameroon	East	Dja Reserve, Boumir Camp
CAS 199237		Hyperoliidae	Hyperolius	ocellatus	1994	Negative			Cameroon	East	Dja Reserve, Boumir Camp
CAS 199238		Hyperoliidae	Hyperolius	ocellatus	1994	Negative			Cameroon	East	Dja Reserve, Boumir Camp
CAS 199239		Hyperoliidae	Hyperolius	ocellatus	1994	Negative			Cameroon	East	Dja Reserve, Boumir Camp
CAS 199240		Hyperoliidae	Hyperolius	ocellatus	1994	Negative			Cameroon	East	Dja Reserve, Boumir Camp
CAS 199241		Hyperoliidae	Hyperolius	ocellatus	1994	Negative			Cameroon	East	Dja Reserve, Boumir Camp
CAS 199242		Hyperoliidae	Hyperolius	ocellatus	1994	Negative			Cameroon	East	Dja Reserve, Boumir Camp
CAS 199243		Hyperoliidae	Hyperolius	ocellatus	1994	Negative			Cameroon	East	Dja Reserve, Boumir Camp
CAS 199244		Hyperoliidae	Hyperolius	ocellatus	1994	Negative			Cameroon	East	Dja Reserve, Boumir Camp
CAS 199245		Hyperoliidae	Hyperolius	ocellatus	1994	Negative			Cameroon	East	Dja Reserve, Boumir Camp
CAS 199246		Hyperoliidae	Hyperolius	ocellatus	1994	Negative			Cameroon	East	Dja Reserve, Boumir Camp
CAS 199247		Hyperoliidae	Hyperolius	ocellatus	1994	Negative			Cameroon	East	Dja Reserve, Boumir Camp
CAS 199248		Hyperoliidae	Hyperolius	ocellatus	1994	Negative			Cameroon	East	Dja Reserve, Boumir Camp
CAS 199249		Hyperoliidae	Hyperolius	ocellatus	1994	Negative			Cameroon	East	Dja Reserve, Boumir Camp
CAS 199250		Hyperoliidae	Hyperolius	ocellatus	1994	Negative			Cameroon	East	Dja Reserve, Boumir Camp
CAS 199251		Hyperoliidae	Hyperolius	ocellatus	1994	Negative			Cameroon	East	Dja Reserve, Boumir Camp
CAS 199252		Hyperoliidae	Hyperolius	ocellatus	1994	Negative			Cameroon	East	Dja Reserve, Boumir Camp
CAS 199253		Hyperoliidae	Hyperolius	ocellatus	1994	Negative			Cameroon	East	Dja Reserve, Boumir Camp
CAS 199254		Hyperoliidae	Hyperolius	ocellatus	1994	Negative			Cameroon	East	Dja Reserve, Boumir Camp
CAS 199255		Hyperoliidae	Hyperolius	ocellatus	1994	Negative			Cameroon	East	Dja Reserve, Boumir Camp
CAS 199256		Hyperoliidae	Hyperolius	ocellatus	1994	Negative			Cameroon	East	Dja Reserve, Boumir Camp
CAS 199257		Hyperoliidae	Hyperolius	ocellatus	1994	Negative			Cameroon	East	Dja Reserve, Boumir Camp
CAS 199258		Hyperoliidae	Hyperolius	ocellatus	1994	Negative			Cameroon	East	Dja Reserve, Boumir Camp
CAS 199259		Hyperoliidae	Hyperolius	ocellatus	1994	Negative			Cameroon	East	Dja Reserve, Boumir Camp
CAS 199260		Hyperoliidae	Hyperolius	ocellatus	1994	Negative			Cameroon	East	Dja Reserve, Boumir Camp
CAS 199261		Hyperoliidae	Hyperolius	ocellatus	1994	Negative			Cameroon	East	Dja Reserve, Boumir Camp
CAS 199262		Hyperoliidae	Hyperolius	ocellatus	1994	Negative			Cameroon	East	Dja Reserve, Boumir Camp
CAS 199263		Hyperoliidae	Hyperolius	ocellatus	1994	Negative			Cameroon	East	Dja Reserve, Boumir Camp
CAS 199264		Hyperoliidae	Hyperolius	ocellatus	1994	Negative			Cameroon	East	Dja Reserve, Boumir Camp
CAS 199266		Hyperoliidae	Hyperolius	ocellatus	1994	Negative			Cameroon	East	Dja Reserve, Boumir Camp
CAS 199349		Hyperoliidae	Hyperolius	platyceps	1994	Negative			Cameroon	East	Dja Reserve, Boumir Camp
CAS 199350		Hyperoliidae	Hyperolius	platyceps	1994	Negative			Cameroon	East	Dja Reserve, Boumir Camp
CAS 199351		Hyperoliidae	Hyperolius	platyceps	1994	Negative			Cameroon	East	Dja Reserve, Boumir Camp
CAS 199352		Hyperoliidae	Hyperolius	platyceps	1994	Negative			Cameroon	East	Dja Reserve, Boumir Camp
CAS 199353		Hyperoliidae	Hyperolius	platyceps	1994	Negative			Cameroon	East	Dja Reserve, Boumir Camp
CAS 199354		Hyperoliidae	Hyperolius	platyceps	1994	Negative			Cameroon	East	Dja Reserve, Boumir Camp
CAS 208544		Hyperoliidae	Hyperolius	platyceps pleurotaenia	1994	Negative			Cameroon	East	Dja Reserve, Boumir Camp
CAS 208545		Hyperoliidae	Hyperolius	platyceps pleurotaenia	1994	Negative			Cameroon	East	Dja Reserve, Boumir Camp
CAS 208546		Hyperoliidae	Hyperolius	platyceps pleurotaenia	1994	Negative			Cameroon	East	Dja Reserve, Boumir Camp
CAS 208547		Hyperoliidae	Hyperolius	platyceps pleurotaenia	1994	Negative			Cameroon	East	Dja Reserve, Boumir Camp
CAS 199191		Hyperoliidae	Hyperolius	tuberculatus	1994	Negative			Cameroon	East	Dja Reserve, Boumir Camp
CAS 199192		Hyperoliidae	Hyperolius	tuberculatus	1994	Negative			Cameroon	East	Dja Reserve, Boumir Camp
CAS 199173		Ptychadenidae	Ptychadena	aequiplicata	1994	Negative			Cameroon	East	Dja Reserve, Boumir Camp
CAS 199174		Ptychadenidae	Ptychadena	aequiplicata	1994	Negative			Cameroon	East	Dja Reserve, Boumir Camp
CAS 199175		Ptychadenidae	Ptychadena	aequiplicata	1994	Negative			Cameroon	East	Dja Reserve, Boumir Camp
CAS 199176		Ptychadenidae	Ptychadena	aequiplicata	1994	Negative			Cameroon	East	Dja Reserve, Boumir Camp
CAS 199177		Ptychadenidae	Ptychadena	aequiplicata	1994	Negative			Cameroon	East	Dja Reserve, Boumir Camp
CAS 199178		Ptychadenidae	Ptychadena	aequiplicata	1994	Negative			Cameroon	East	Dja Reserve, Boumir Camp
CAS 199179		Ptychadenidae	Ptychadena	aequiplicata	1994	Negative			Cameroon	East	Dja Reserve, Boumir Camp
CAS 199180		Ptychadenidae	Ptychadena	aequiplicata	1994	Negative			Cameroon	East	Dja Reserve, Boumir Camp
CAS 199181		Ptychadenidae	Ptychadena	aequiplicata	1994	Negative			Cameroon	East	Dja Reserve, Boumir Camp
CAS 199182		Ptychadenidae	Ptychadena	aequiplicata	1994	Negative			Cameroon	East	Dja Reserve, Boumir Camp
CAS 199183		Ptychadenidae	Ptychadena	aequiplicata	1994	Negative			Cameroon	East	Dja Reserve, Boumir Camp
CAS 199184		Ptychadenidae	Ptychadena	aequiplicata	1994	Negative			Cameroon	East	Dja Reserve, Boumir Camp
CAS 199196		Ptychadenidae	Ptychadena	perreti	1994	Negative			Cameroon	East	Dja Reserve, Boumir Camp
CAS 199197		Ptychadenidae	Ptychadena	perreti	1994	Negative			Cameroon	East	Dja Reserve, Boumir Camp
CAS 199198		Ptychadenidae	Ptychadena	perreti	1994	Negative			Cameroon	East	Dja Reserve, Boumir Camp
CAS 199321		Ranidae	Hylarana	albolabris	1994	Negative			Cameroon	East	Dja Reserve, Boumir Camp
CAS 199322		Ranidae	Hylarana	albolabris	1994	Negative			Cameroon	East	Dja Reserve, Boumir Camp
CAS 199323		Ranidae	Hylarana	albolabris	1994	Negative			Cameroon	East	Dja Reserve, Boumir Camp
CAS 199324		Ranidae	Hylarana	albolabris	1994	Negative			Cameroon	East	Dja Reserve, Boumir Camp
CAS 199325		Ranidae	Hylarana	albolabris	1994	Negative			Cameroon	East	Dja Reserve, Boumir Camp
CAS 199326		Ranidae	Hylarana	albolabris	1994	Negative			Cameroon	East	Dja Reserve, Boumir Camp
CAS 199327		Ranidae	Hylarana	albolabris	1994	Negative			Cameroon	East	Dja Reserve, Boumir Camp
CAS 199328		Ranidae	Hylarana	albolabris	1994	Negative			Cameroon	East	Dja Reserve, Boumir Camp
MCZ A-136744		Arthroleptidae	Arthroleptis	variabilis	2004	Negative			Cameroon	Southwest	near Etome, Small Mt. Cameroon
MCZ A-136772		Arthroleptidae	Arthroleptis	variabilis	2004	Negative			Cameroon	Southwest	E of Ntale Village, Banyang Mbo Forest Reserve, N/NW of Ntale Plateau
MCZ A-136773		Arthroleptidae	Arthroleptis	variabilis	2004	Negative			Cameroon	Southwest	E of Ntale Village, Banyang Mbo Forest Reserve, N/NW of Ntale Plateau
MCZ A-136774		Arthroleptidae	Arthroleptis	variabilis	2004	Negative			Cameroon	Southwest	E of Ntale Village, Banyang Mbo Forest Reserve, N/NW of Ntale Plateau
MCZ A-136775		Arthroleptidae	Arthroleptis	variabilis	2004	Negative			Cameroon	Southwest	E of Ntale Village, Banyang Mbo Forest Reserve, N/NW of Ntale Plateau
MCZ A-136776		Arthroleptidae	Arthroleptis	variabilis	2004	Negative			Cameroon	Southwest	E of Ntale Village, Banyang Mbo Forest Reserve, N/NW of Ntale Plateau
MCZ A-136777		Arthroleptidae	Arthroleptis	variabilis	2004	Negative			Cameroon	Southwest	E of Ntale Village, Banyang Mbo Forest Reserve, N/NW of Ntale Plateau
MCZ A-136778		Arthroleptidae	Arthroleptis	variabilis	2004	Negative			Cameroon	Southwest	E of Ntale Village, Banyang Mbo Forest Reserve, N/NW of Ntale Plateau
MCZ A-136779		Arthroleptidae	Arthroleptis	variabilis	2004	Negative			Cameroon	Southwest	E of Ntale Village, Banyang Mbo Forest Reserve, N/NW of Ntale Plateau
MCZ A-136780		Arthroleptidae	Arthroleptis	variabilis	2004	Negative			Cameroon	Southwest	E of Ntale Village, Banyang Mbo Forest Reserve, N/NW of Ntale Plateau
MCZ A-136820		Arthroleptidae	Arthroleptis	variabilis	2004	Negative			Cameroon	Southwest	Ekoneman Awa, Ejagham Forest Reserve
MCZ A-136821		Arthroleptidae	Arthroleptis	variabilis	2004	Negative			Cameroon	Southwest	Ekoneman Awa, Ejagham Forest Reserve
MCZ A-136822		Arthroleptidae	Arthroleptis	variabilis	2004	Negative			Cameroon	Southwest	Ekoneman Awa, Ejagham Forest Reserve
MCZ A-136823		Arthroleptidae	Arthroleptis	variabilis	2004	Negative			Cameroon	Southwest	Ekoneman Awa, Ejagham Forest Reserve
MCZ A-136824		Arthroleptidae	Arthroleptis	variabilis	2004	Negative			Cameroon	Southwest	Ekoneman Awa, Ejagham Forest Reserve
MCZ A-136825		Arthroleptidae	Arthroleptis	variabilis	2004	Negative			Cameroon	Southwest	Ekoneman Awa, Ejagham Forest Reserve
MCZ A-136826		Arthroleptidae	Arthroleptis	variabilis	2004	Negative			Cameroon	Southwest	Ekoneman Awa, Ejagham Forest Reserve
MCZ A-136827		Arthroleptidae	Arthroleptis	variabilis	2004	Negative			Cameroon	Southwest	Ekoneman Awa, Ejagham Forest Reserve
MCZ A-136828		Arthroleptidae	Arthroleptis	variabilis	2004	Negative			Cameroon	Southwest	Ekoneman Awa, Ejagham Forest Reserve
MCZ A-136829		Arthroleptidae	Arthroleptis	variabilis	2004	Negative			Cameroon	Southwest	Ekoneman Awa, Ejagham Forest Reserve
MCZ A-136830		Arthroleptidae	Arthroleptis	variabilis	2004	Negative			Cameroon	Southwest	Ekoneman Awa, Ejagham Forest Reserve
MCZ A-136931		Arthroleptidae	Arthroleptis	variabilis	2004	Negative			Cameroon	Littoral	Mt. Manengouba
MCZ A-136932		Arthroleptidae	Arthroleptis	variabilis	2004	Negative			Cameroon	Littoral	Mt. Manengouba
MCZ A-136852		Arthroleptidae	Astylosternus	ranoides	2004	Negative			Cameroon	Northwest	Ekoneman Awa, Ejagham Forest Reserve
MCZ A-136934		Arthroleptidae	Astylosternus	rheophilus	2004	Negative			Cameroon	Littoral	Mt. Manengouba
MCZ A-136933		Arthroleptidae	Cardioglossa	manengouba	2004	Negative			Cameroon	Littoral	Mt. Manengouba
MCZ A-136884		Arthroleptidae	Leptodactylodon	axillaris	2004	Negative			Cameroon	West	Mt. Bamboutos summit
MCZ A-136885		Arthroleptidae	Leptodactylodon	axillaris	2004	Negative			Cameroon	West	Mt. Bamboutos summit
MCZ A-136886		Arthroleptidae	Leptodactylodon	axillaris	2004	Negative			Cameroon	West	Mt. Bamboutos summit
MCZ A-136887		Arthroleptidae	Leptodactylodon	axillaris	2004	Negative			Cameroon	West	Mt. Bamboutos summit
MCZ A-136890		Arthroleptidae	Leptodactylodon	axillaris	2004	Negative			Cameroon	West	Mt. Bamboutos summit
MCZ A-136922		Bufonidae	Amietophrynus	cf. maculatus	2004	Negative			Cameroon	Littoral	Mt. Manengouba
MCZ A-136765		Bufonidae	Amietophrynus	maculatus	2004	Negative			Cameroon	Southwest	Efolofo, N slope of Mt. Cameroon
MCZ A-136766		Bufonidae	Amietophrynus	maculatus	2004	Negative			Cameroon	Southwest	Efolofo, N slope of Mt. Cameroon
MCZ A-136767		Bufonidae	Amietophrynus	maculatus	2004	Negative			Cameroon	Southwest	Efolofo, N slope of Mt. Cameroon
MCZ A-136893		Bufonidae	Amietophrynus	villiersi	2004	Negative			Cameroon	West	Mt. Bamboutos summit
MCZ A-136926		Bufonidae	Amietophrynus	villiersi	2004	Negative			Cameroon	Littoral	Mt. Manengouba
MCZ A-136902		Bufonidae	Werneria	bambutensis	2004	Negative			Cameroon	West	Mt. Bamboutos summit
MCZ A-136896		Bufonidae	Wolterstorffina	mirei	2004	Negative			Cameroon	West	Mt. Bamboutos summit
MCZ A-136897		Bufonidae	Wolterstorffina	mirei	2004	Negative			Cameroon	West	Mt. Bamboutos summit
MCZ A-136899		Bufonidae	Wolterstorffina	mirei	2004	Negative			Cameroon	West	Mt. Bamboutos summit
MCZ A-136900		Bufonidae	Wolterstorffina	mirei	2004	Negative			Cameroon	West	Mt. Bamboutos summit
MCZ A-136901		Bufonidae	Wolterstorffina	mirei	2004	Negative			Cameroon	West	Mt. Bamboutos summit
MCZ A-136915		Hyperoliidae	Hyperolius	balfouri viridistriatus	2004	Negative			Cameroon	Littoral	Mt. Manengouba
MCZ A-136916		Hyperoliidae	Hyperolius	balfouri viridistriatus	2004	Negative			Cameroon	Littoral	Mt. Manengouba
MCZ A-136917		Hyperoliidae	Hyperolius	balfouri viridistriatus	2004	Negative			Cameroon	Littoral	Mt. Manengouba
MCZ A-136918		Hyperoliidae	Hyperolius	balfouri viridistriatus	2004	Negative			Cameroon	Littoral	Mt. Manengouba
MCZ A-136919		Hyperoliidae	Hyperolius	balfouri viridistriatus	2004	Negative			Cameroon	Littoral	Mt. Manengouba
MCZ A-136921		Hyperoliidae	Hyperolius	guttulatus	2004	Negative			Cameroon	Littoral	Mt. Manengouba
MCZ A-136910		Hyperoliidae	Kassina	decorata	2004	Negative			Cameroon	Littoral	Mt. Manengouba
MCZ A-136911		Hyperoliidae	Kassina	decorata	2004	Negative			Cameroon	Littoral	Mt. Manengouba
MCZ A-136912		Hyperoliidae	Kassina	decorata	2004	Negative			Cameroon	Littoral	Mt. Manengouba
MCZ A-136913		Hyperoliidae	Kassina	decorata	2004	Negative			Cameroon	Littoral	Mt. Manengouba
MCZ A-136914		Hyperoliidae	Kassina	decorata	2004	Negative			Cameroon	Littoral	Mt. Manengouba
MCZ A-136923		Phrynobatrachidae	Phrynobatrachus	manengoubensis	2004	Negative			Cameroon	Littoral	Mt. Manengouba
MCZ A-136875		Phrynobatrachidae	Phrynobatrachus	steindachneri	2004	Negative			Cameroon	Northwest	Lake Oku
MCZ A-136876		Phrynobatrachidae	Phrynobatrachus	steindachneri	2004	Negative			Cameroon	Northwest	Lake Oku
MCZ A-136877		Phrynobatrachidae	Phrynobatrachus	steindachneri	2004	Negative			Cameroon	Northwest	Lake Oku
MCZ A-136878		Phrynobatrachidae	Phrynobatrachus	steindachneri	2004	Negative			Cameroon	Northwest	Lake Oku
MCZ A-136879		Phrynobatrachidae	Phrynobatrachus	steindachneri	2004	Negative			Cameroon	Northwest	Lake Oku
MCZ A-136880		Phrynobatrachidae	Phrynobatrachus	steindachneri	2004	Negative			Cameroon	Northwest	Lake Oku
MCZ A-136881		Phrynobatrachidae	Phrynobatrachus	steindachneri	2004	Negative			Cameroon	Northwest	Lake Oku
MCZ A-136882		Phrynobatrachidae	Phrynobatrachus	steindachneri	2004	Negative			Cameroon	Northwest	Lake Oku
MCZ A-136891		Phrynobatrachidae	Phrynobatrachus	steindachneri	2004	Negative			Cameroon	West	Mt. Bamboutos summit
MCZ A-136892		Phrynobatrachidae	Phrynobatrachus	steindachneri	2004	Negative			Cameroon	West	Mt. Bamboutos summit
MCZ A-136903		Phrynobatrachidae	Phrynobatrachus	steindachneri	2004	Negative			Cameroon	West	below Mt. Bamboutos summit
MCZ A-136904		Phrynobatrachidae	Phrynobatrachus	steindachneri	2004	Negative			Cameroon	West	below Mt. Bamboutos summit
MCZ A-136905		Phrynobatrachidae	Phrynobatrachus	steindachneri	2004	Negative			Cameroon	West	below Mt. Bamboutos summit
MCZ A-136907		Phrynobatrachidae	Phrynobatrachus	steindachneri	2004	Negative			Cameroon	West	below Mt. Bamboutos summit
MCZ A-136908		Phrynobatrachidae	Phrynobatrachus	steindachneri	2004	Negative			Cameroon	West	below Mt. Bamboutos summit
MCZ A-136909		Phrynobatrachidae	Phrynobatrachus	steindachneri	2004	Negative			Cameroon	West	below Mt. Bamboutos summit
MCZ A-136927		Phrynobatrachidae	Phrynobatrachus	steindachneri	2004	Negative			Cameroon	Littoral	Mt. Manengouba
MCZ A-136928		Phrynobatrachidae	Phrynobatrachus	steindachneri	2004	Negative			Cameroon	Littoral	Mt. Manengouba
MCZ A-136929		Phrynobatrachidae	Phrynobatrachus	steindachneri	2004	Negative			Cameroon	Littoral	Mt. Manengouba
MCZ A-136930		Phrynobatrachidae	Phrynobatrachus	steindachneri	2004	Negative			Cameroon	Littoral	Mt. Manengouba
MCZ A-136853		Pipidae	Xenopus	longipes	2004	Negative			Cameroon	Northwest	Lake Oku
MCZ A-136854		Pipidae	Xenopus	longipes	2004	Negative			Cameroon	Northwest	Lake Oku
MCZ A-136855		Pipidae	Xenopus	longipes	2004	Negative			Cameroon	Northwest	Lake Oku
MCZ A-136856		Pipidae	Xenopus	longipes	2004	Negative			Cameroon	Northwest	Lake Oku
MCZ A-136858		Pipidae	Xenopus	longipes	2004	Negative			Cameroon	Northwest	Lake Oku
MCZ A-136859		Pipidae	Xenopus	longipes	2004	Negative			Cameroon	Northwest	Lake Oku
MCZ A-136860		Pipidae	Xenopus	longipes	2004	Negative			Cameroon	Northwest	Lake Oku
MCZ A-136861		Pipidae	Xenopus	longipes	2004	Negative			Cameroon	Northwest	Lake Oku
MCZ A-136862		Pipidae	Xenopus	longipes	2004	Negative			Cameroon	Northwest	Lake Oku
MCZ A-136863		Pipidae	Xenopus	longipes	2004	Negative			Cameroon	Northwest	Lake Oku
MCZ A-136864		Pipidae	Xenopus	longipes	2004	Negative			Cameroon	Northwest	Lake Oku
MCZ A-136865		Pipidae	Xenopus	longipes	2004	Negative			Cameroon	Northwest	Lake Oku
MCZ A-136866		Pipidae	Xenopus	longipes	2004	Negative			Cameroon	Northwest	Lake Oku
MCZ A-136867		Pipidae	Xenopus	longipes	2004	Negative			Cameroon	Northwest	Lake Oku
MCZ A-136868		Pipidae	Xenopus	longipes	2004	Negative			Cameroon	Northwest	Lake Oku
MCZ A-136869		Pipidae	Xenopus	longipes	2004	Negative			Cameroon	Northwest	Lake Oku
MCZ A-136870		Pipidae	Xenopus	longipes	2004	Negative			Cameroon	Northwest	Lake Oku
MCZ A-136872		Pipidae	Xenopus	longipes	2004	Negative			Cameroon	Northwest	Lake Oku
MCZ A-136873		Pipidae	Xenopus	longipes	2004	Negative			Cameroon	Northwest	Lake Oku
MCZ A-136874		Pipidae	Xenopus	longipes	2004	Negative			Cameroon	Northwest	Lake Oku
	34	Arthroleptidae	Arthroleptis	adelphus	2006	Negative			Cameroon	Northwest	Elemighong
	280	Arthroleptidae	Arthroleptis	adelphus	2006	Negative			Cameroon	Northwest	Elemighong
	323	Arthroleptidae	Arthroleptis	adelphus	2006	Negative			Cameroon	Northwest	Elemighong
	28	Arthroleptidae	Arthroleptis	cf. poecilonotus	2006	Negative			Cameroon	Northwest	Anyajua Waterfall
	231	Arthroleptidae	Arthroleptis	cf. poecilonotus	2006	Negative			Cameroon	Northwest	Abuh
MCZ A-137983		Arthroleptidae	Arthroleptis	palava	2006	Negative			Cameroon	Northwest	Elak Oku Village
	277	Arthroleptidae	Arthroleptis	palava	2006	Negative			Cameroon	Northwest	Elemighong
	82	Arthroleptidae	Arthroleptis	poecilonotos	2006	Negative			Cameroon	Northwest	Elemighong
	86	Arthroleptidae	Arthroleptis	poecilonotos	2006	Negative			Cameroon	Northwest	Elemighong
	204	Arthroleptidae	Arthroleptis	poecilonotos	2006	Negative			Cameroon	Northwest	Elemighong
	206	Arthroleptidae	Arthroleptis	poecilonotos	2006	Negative			Cameroon	Northwest	Elemighong
	251	Arthroleptidae	Arthroleptis	poecilonotos	2006	Negative			Cameroon	Northwest	Elemighong
	276	Arthroleptidae	Arthroleptis	poecilonotos	2006	Negative			Cameroon	Northwest	Elemighong
	283	Arthroleptidae	Arthroleptis	poecilonotos	2006	Negative			Cameroon	Northwest	Elemighong
MCZ A-137982		Arthroleptidae	Arthroleptis	poecilonotus	2006	Negative			Cameroon	Northwest	Obang
MCZ A-137984		Arthroleptidae	Arthroleptis	poecilonotus	2006	Negative			Cameroon	Northwest	Elak Oku Village
MCZ A-137978		Arthroleptidae	Arthroleptis	variabilis	2006	Negative			Cameroon	Littoral	Mt. Manengouba, Nsoung
MCZ A-137979		Arthroleptidae	Arthroleptis	variabilis	2006	Negative			Cameroon	Littoral	Mt. Manengouba, Nsoung
MCZ A-137980		Arthroleptidae	Arthroleptis	variabilis	2006	Negative			Cameroon	Littoral	Mt. Manengouba
MCZ A-137981		Arthroleptidae	Arthroleptis	variabilis	2006	Negative			Cameroon	Littoral	Mt. Manengouba
	83	Arthroleptidae	Arthroleptis	variabilis	2006	Negative			Cameroon	Northwest	Elemighong
	279	Arthroleptidae	Arthroleptis	variabilis	2006	Negative			Cameroon	Northwest	Elemighong
MCZ A-137938		Arthroleptidae	Astylosternus	perreti	2006	Negative			Cameroon	Littoral	Mt. Manengouba, Nsoung
MCZ A-137939		Arthroleptidae	Astylosternus	perreti	2006	Negative			Cameroon	Littoral	Mt. Manengouba, Nsoung
MCZ A-137941		Arthroleptidae	Astylosternus	perreti	2006	Negative			Cameroon	Littoral	Mt. Manengouba, Nsoung
	17	Arthroleptidae	Astylosternus	ranoides	2006	Negative			Cameroon	Northwest	Anyafouma Forest
	94	Arthroleptidae	Astylosternus	ranoides	2006	Negative			Cameroon	Northwest	Anyafouma Forest
MCZ A-137937		Arthroleptidae	Astylosternus	rheophilus	2006	Negative			Cameroon	Littoral	Mt. Manengouba, Nsoung
MCZ A-137953		Arthroleptidae	Astylosternus	rheophilus	2006	Negative			Cameroon	Littoral	Mt. Manengouba
MCZ A-137963		Arthroleptidae	Astylosternus	rheophilus	2006	Negative			Cameroon	Littoral	Mt. Mbam
MCZ A-137964		Arthroleptidae	Astylosternus	rheophilus	2006	Negative			Cameroon	Littoral	Mt. Mbam
MCZ A-137965		Arthroleptidae	Astylosternus	rheophilus	2006	Negative			Cameroon	Littoral	Mt. Mbam
MCZ A-137966		Arthroleptidae	Astylosternus	rheophilus	2006	Negative			Cameroon	Littoral	Mt. Mbam
MCZ A-137967		Arthroleptidae	Astylosternus	rheophilus	2006	Negative			Cameroon	Littoral	Mt. Mbam
MCZ A-137968		Arthroleptidae	Astylosternus	rheophilus	2006	Negative			Cameroon	Littoral	Mt. Mbam
MCZ A-137969		Arthroleptidae	Astylosternus	rheophilus	2006	Negative			Cameroon	Littoral	Mt. Mbam
MCZ A-137971		Arthroleptidae	Astylosternus	rheophilus	2006	Negative			Cameroon	West	Mt. Bamboutos
MCZ A-137974		Arthroleptidae	Astylosternus	rheophilus	2006	Negative			Cameroon	Northwest	Lake Awing
MCZ A-137975		Arthroleptidae	Astylosternus	rheophilus	2006	Negative			Cameroon	Northwest	Elak Oku Village
MCZ A-137976		Arthroleptidae	Astylosternus	rheophilus	2006	Negative			Cameroon	Northwest	Elak Oku Village
	103	Arthroleptidae	Astylosternus	rheophilus	2006	Negative			Cameroon	Northwest	Anyafouma Forest
	228	Arthroleptidae	Astylosternus	rheophilus	2006	Negative			Cameroon	Northwest	Anyafouma Forest
	271	Arthroleptidae	Astylosternus	rheophilus	2006	Negative			Cameroon	Northwest	Elemighong
	278	Arthroleptidae	Astylosternus	rheophilus	2006	Negative			Cameroon	Northwest	Anyafouma Forest
MCZ A-137942		Arthroleptidae	Astylosternus	sp.	2006	Negative			Cameroon	Littoral	Mt. Manengouba, Nsoung
MCZ A-137943		Arthroleptidae	Astylosternus	sp.	2006	Negative			Cameroon	Littoral	Mt. Manengouba, Nsoung
MCZ A-137949		Arthroleptidae	Astylosternus	sp.	2006	Negative			Cameroon	Littoral	Mt. Manengouba, Nsoung
MCZ A-137950		Arthroleptidae	Astylosternus	sp.	2006	Negative			Cameroon	Littoral	Mt. Manengouba, Nsoung
MCZ A-137908		Arthroleptidae	Cardioglossa	manengouba	2006	Negative			Cameroon	Littoral	Mt. Manengouba
MCZ A-137909		Arthroleptidae	Cardioglossa	manengouba	2006	Negative			Cameroon	Littoral	Mt. Manengouba
MCZ A-137910		Arthroleptidae	Cardioglossa	manengouba	2006	Negative			Cameroon	Littoral	Mt. Manengouba
MCZ A-137906		Arthroleptidae	Cardioglossa	melanogaster	2006	Negative			Cameroon	Littoral	Mt. Manengouba, Nsoung
MCZ A-137907		Arthroleptidae	Cardioglossa	melanogaster	2006	Negative			Cameroon	Littoral	Mt. Manengouba, Nsoung
MCZ A-137919		Arthroleptidae	Cardioglossa	oreas	2006	Negative			Cameroon	West	Mt. Bamboutos
MCZ A-137920		Arthroleptidae	Cardioglossa	oreas	2006	Negative			Cameroon	West	Mt. Bamboutos
MCZ A-137921		Arthroleptidae	Cardioglossa	oreas	2006	Negative			Cameroon	West	Mt. Bamboutos
MCZ A-137922		Arthroleptidae	Cardioglossa	oreas	2006	Negative			Cameroon	West	near Bamboutos summit
MCZ A-137927		Arthroleptidae	Cardioglossa	oreas	2006	Negative			Cameroon	Northwest	Mt. Oku, forest reserve northwest of summit
MCZ A-137928		Arthroleptidae	Cardioglossa	oreas	2006	Negative			Cameroon	Northwest	Lake Oku
	73	Arthroleptidae	Cardioglossa	oreas	2006	Negative			Cameroon	Northwest	Anyafouma Forest
	79	Arthroleptidae	Cardioglossa	oreas	2006	Negative			Cameroon	Northwest	Anyafouma Forest
	91	Arthroleptidae	Cardioglossa	oreas	2006	Negative			Cameroon	Northwest	Anyafouma Forest
	275	Arthroleptidae	Cardioglossa	oreas	2006	Negative			Cameroon	Northwest	Anyafouma Forest
	313	Arthroleptidae	Cardioglossa	oreas	2006	Negative			Cameroon	Northwest	Anyafouma Forest
MCZ A-137916		Arthroleptidae	Cardioglossa	pulchra	2006	Negative			Cameroon	West	Mt. Bamboutos
MCZ A-137917		Arthroleptidae	Cardioglossa	pulchra	2006	Negative			Cameroon	West	Mt. Bamboutos
MCZ A-137918		Arthroleptidae	Cardioglossa	pulchra	2006	Negative			Cameroon	West	Mt. Bamboutos
MCZ A-137924		Arthroleptidae	Cardioglossa	pulchra	2006	Negative			Cameroon	Northwest	Elak Oku Village
MCZ A-137925		Arthroleptidae	Cardioglossa	pulchra	2006	Negative			Cameroon	Northwest	Elak Oku Village
	337	Arthroleptidae	Cardioglossa	pulchra	2006	Negative			Cameroon	Northwest	Fundong
MCZ A-137911		Arthroleptidae	Cardioglossa	schioetzi	2006	Negative			Cameroon	Littoral	village at Mt. Mbam
MCZ A-137912		Arthroleptidae	Cardioglossa	schioetzi	2006	Negative			Cameroon	Littoral	village at Mt. Mbam
MCZ A-137913		Arthroleptidae	Cardioglossa	schioetzi	2006	Negative			Cameroon	Littoral	village at Mt. Mbam
MCZ A-137914		Arthroleptidae	Cardioglossa	schioetzi	2006	Negative			Cameroon	Littoral	village at Mt. Mbam
MCZ A-137915		Arthroleptidae	Cardioglossa	schioetzi	2006	Negative			Cameroon	Littoral	village at Mt. Mbam
MCZ A-137926		Arthroleptidae	Cardioglossa	schioetzi	2006	Negative			Cameroon	Northwest	Elak Oku Village
	36	Arthroleptidae	Leptodactylodon	bicolor	2006	Negative			Cameroon	Northwest	Elemighong
	211	Arthroleptidae	Leptodactylodon	bicolor	2006	Negative			Cameroon	Northwest	Elemighong
	21 (263???????)	Arthroleptidae	Leptodactylodon	bicolor	2006	Negative			Cameroon	Northwest	Elemighong
MCZ A-137940		Arthroleptidae	Leptodactylodon	mertensi	2006	Negative			Cameroon	Littoral	Mt. Manengouba, Nsoung
MCZ A-137944		Arthroleptidae	Leptodactylodon	mertensi	2006	Negative			Cameroon	Littoral	Mt. Manengouba, Nsoung
MCZ A-137945		Arthroleptidae	Leptodactylodon	mertensi	2006	Negative			Cameroon	Littoral	Mt. Manengouba, Nsoung
MCZ A-137946		Arthroleptidae	Leptodactylodon	mertensi	2006	Negative			Cameroon	Littoral	Mt. Manengouba, Nsoung
MCZ A-137947		Arthroleptidae	Leptodactylodon	mertensi	2006	Negative			Cameroon	Littoral	Mt. Manengouba, Nsoung
MCZ A-137948		Arthroleptidae	Leptodactylodon	mertensi	2006	Negative			Cameroon	Littoral	Mt. Manengouba, Nsoung
MCZ A-137952		Arthroleptidae	Leptodactylodon	mertensi	2006	Negative			Cameroon	Littoral	Mt. Manengouba, Nsoung
MCZ A-137956		Arthroleptidae	Leptodactylodon	perreti	2006	Negative			Cameroon	Littoral	Mt. Mbam
MCZ A-137957		Arthroleptidae	Leptodactylodon	perreti	2006	Negative			Cameroon	Littoral	Mt. Mbam
MCZ A-137958		Arthroleptidae	Leptodactylodon	perreti	2006	Negative			Cameroon	Littoral	Mt. Mbam
MCZ A-137959		Arthroleptidae	Leptodactylodon	perreti	2006	Negative			Cameroon	Littoral	Mt. Mbam
MCZ A-137960		Arthroleptidae	Leptodactylodon	perreti	2006	Negative			Cameroon	Littoral	Mt. Mbam
MCZ A-137961		Arthroleptidae	Leptodactylodon	perreti	2006	Negative			Cameroon	Littoral	Mt. Mbam
MCZ A-137962		Arthroleptidae	Leptodactylodon	perreti	2006	Negative			Cameroon	Littoral	Mt. Mbam
	71	Arthroleptidae	Leptodactylodon	perreti	2006	Negative			Cameroon	Northwest	Anyafouma forest by waterfall drift fences
	108	Arthroleptidae	Leptodactylodon	perreti	2006	Negative			Cameroon	Northwest	Anyafouma Forest
	263	Arthroleptidae	Leptodactylodon	perreti	2006	Negative			Cameroon	Northwest	Anyafouma Forest
	309	Arthroleptidae	Leptodactylodon	perreti	2006	Negative			Cameroon	Northwest	Anyafouma Forest
MCZ A-138024		Arthroleptidae	Leptopelis	sp.	2006	Negative			Cameroon	Littoral	Mt. Manengouba, Nsoung
	325	Arthroleptidae	Trichobatrachus	robustus	2006	Negative			Cameroon	Northwest	Elemighong
	87	Arthroleptidae	Trichobatracus	robustus	2006	Negative			Cameroon	Northwest	Elemighong
MCZ A-137994		Bufonidae	Amietophrynus	maculatus	2006	Negative			Cameroon	Littoral	Mt. Mbam
MCZ A-137996		Bufonidae	Amietophrynus	maculatus	2006	Negative			Cameroon	West	Mt. Bamboutos
MCZ A-137997		Bufonidae	Amietophrynus	maculatus	2006	Negative			Cameroon	West	Mt. Bamboutos
MCZ A-138003		Bufonidae	Amietophrynus	maculatus	2006	Negative			Cameroon	Adamaoua	Sambolabbo
MCZ A-138004		Bufonidae	Amietophrynus	maculatus	2006	Negative			Cameroon	Adamaoua	Sambolabbo
MCZ A-138005		Bufonidae	Amietophrynus	maculatus	2006	Negative			Cameroon	Adamaoua	Sambolabbo
MCZ A-138006		Bufonidae	Amietophrynus	maculatus	2006	Negative			Cameroon	Northwest	Lake Wum, Wum
MCZ A-138007		Bufonidae	Amietophrynus	maculatus	2006	Negative			Cameroon	Northwest	Lake Wum, Wum
MCZ A-138008		Bufonidae	Amietophrynus	maculatus	2006	Negative			Cameroon	Northwest	Lake Wum, Wum
MCZ A-138009		Bufonidae	Amietophrynus	maculatus	2006	Negative			Cameroon	Northwest	Wum, Wum Council Compound
MCZ A-138010		Bufonidae	Amietophrynus	maculatus	2006	Negative			Cameroon	Northwest	Obang
	90	Bufonidae	Amietophrynus	maculatus	2006	Negative			Cameroon	Northwest	Elemighong
	241	Bufonidae	Amietophrynus	maculatus	2006	Negative			Cameroon	Northwest	Abuh
MCZ A-137998		Bufonidae	Werneria	bambutensis	2006	Negative			Cameroon	West	Mt. Bamboutos
MCZ A-138002		Bufonidae	Werneria	bambutensis	2006	Negative			Cameroon	West	Bamboutos
	80	Bufonidae	Werneria	bambutensis	2006	Negative			Cameroon	Northwest	Anyafouma forest
MCZ A-137992		Bufonidae	Werneria	tandyi	2006	Negative			Cameroon	Littoral	Mt. Manengouba, Nsoung
MCZ A-137993		Bufonidae	Werneria	tandyi	2006	Negative			Cameroon	Littoral	Mt. Manengouba, Nsoung
MCZ A-137995		Bufonidae	Wolterstorffina	mirei	2006	Negative			Cameroon	West	Mt. Bamboutos
	295	Hyperoliidae	Afrixalus	fulvovittatus	2006	Negative			Cameroon	Northwest	Elemighong
	296	Hyperoliidae	Afrixalus	fulvovittatus	2006	Negative			Cameroon	Northwest	Elemighong
	306	Hyperoliidae	Afrixalus	fulvovittatus	2006	Negative			Cameroon	Northwest	Elemighong
	248, 252	Hyperoliidae	Afrixalus	fulvovittatus	2006	Negative			Cameroon	Northwest	Elemighong
	255, 254	Hyperoliidae	Afrixalus	fulvovittatus	2006	Negative			Cameroon	Northwest	Elemighong
	256, 266	Hyperoliidae	Afrixalus	fulvovittatus	2006	Negative			Cameroon	Northwest	Elemighong
	123	Hyperoliidae	Hyperolius	riggenbachi	2006	Negative			Cameroon	Northwest	Elemighong
	214	Hyperoliidae	Hyperolius	riggenbachi	2006	Negative			Cameroon	Northwest	Elemighong
	226	Hyperoliidae	Hyperolius	riggenbachi	2006	Negative			Cameroon	Northwest	Elemighong
	247	Hyperoliidae	Hyperolius	riggenbachi	2006	Negative			Cameroon	Northwest	Elemighong
	249	Hyperoliidae	Hyperolius	riggenbachi	2006	Negative			Cameroon	Northwest	Elemighong
	258	Hyperoliidae	Hyperolius	riggenbachi	2006	Negative			Cameroon	Northwest	Elemighong
	261	Hyperoliidae	Hyperolius	riggenbachi	2006	Negative			Cameroon	Northwest	Elemighong
	262	Hyperoliidae	Hyperolius	riggenbachi	2006	Negative			Cameroon	Northwest	Elemighong
	274	Hyperoliidae	Hyperolius	riggenbachi	2006	Negative			Cameroon	Northwest	Elemighong
	298	Hyperoliidae	Hyperolius	riggenbachi	2006	Negative			Cameroon	Northwest	Elemighong
	111, 104	Hyperoliidae	Hyperolius	riggenbachi	2006	Negative			Cameroon	Northwest	Elemighong
	117, 113	Hyperoliidae	Hyperolius	riggenbachi	2006	Negative			Cameroon	Northwest	Elemighong
	268, 257	Hyperoliidae	Hyperolius	riggenbachi	2006	Negative			Cameroon	Northwest	Elemighong
	33, 41	Hyperoliidae	Hyperolius	riggenbachi	2006	Negative			Cameroon	Northwest	Elemighong
	40, 47	Hyperoliidae	Hyperolius	riggenbachi	2006	Negative			Cameroon	Northwest	Elemighong
	43, 37	Hyperoliidae	Hyperolius	riggenbachi	2006	Negative			Cameroon	Northwest	Elemighong
	53, 51	Hyperoliidae	Hyperolius	riggenbachi	2006	Negative			Cameroon	Northwest	Elemighong
	55, 52	Hyperoliidae	Hyperolius	riggenbachi	2006	Negative			Cameroon	Northwest	Elemighong
	56, 35	Hyperoliidae	Hyperolius	riggenbachi	2006	Negative			Cameroon	Northwest	Elemighong
	57, 54	Hyperoliidae	Hyperolius	riggenbachi	2006	Negative			Cameroon	Northwest	Elemighong
MCZ A-138032		Hyperoliidae	Kassina	decorata	2006	Negative			Cameroon	Littoral	Mt. Manengouba
MCZ A-138033		Hyperoliidae	Kassina	decorata	2006	Negative			Cameroon	Littoral	Mt. Manengouba
MCZ A-138042		Hyperoliidae	Kassina	decorata	2006	Negative			Cameroon	Littoral	Mt. Manengouba
MCZ A-138029		Petropedetidae	Petropedetes	perreti	2006	Negative			Cameroon	Littoral	Mt. Manengouba, Nsoung
	246	Phrynobatrachidae	Phrynobatrachus	cf. natalensis	2006	Negative			Cameroon	Northwest	Anyafouma Forest
	18	Phrynobatrachidae	Phrynobatrachus	cf. steindachneri	2006	Negative			Cameroon	Northwest	Lake Oku
	21	Phrynobatrachidae	Phrynobatrachus	cf. steindachneri	2006	Negative			Cameroon	Northwest	Lake Oku
	22	Phrynobatrachidae	Phrynobatrachus	cf. steindachneri	2006	Negative			Cameroon	Northwest	Lake Oku
	39	Phrynobatrachidae	Phrynobatrachus	cf. steindachneri	2006	Negative			Cameroon	Northwest	Anyafouma Forest
	45	Phrynobatrachidae	Phrynobatrachus	cf. steindachneri	2006	Negative			Cameroon	Northwest	Anyafouma Forest
	59	Phrynobatrachidae	Phrynobatrachus	cf. steindachneri	2006	Negative			Cameroon	Northwest	Anyafouma Forest
	107	Phrynobatrachidae	Phrynobatrachus	cf. steindachneri	2006	Negative			Cameroon	Northwest	Anyafouma Forest
	120	Phrynobatrachidae	Phrynobatrachus	cf. steindachneri	2006	Negative			Cameroon	Northwest	Kilum-Ijim Plantlife Sanctuary
	127	Phrynobatrachidae	Phrynobatrachus	cf. steindachneri	2006	Negative			Cameroon	Northwest	Kilum-Ijim Plantlife Sanctuary
	129	Phrynobatrachidae	Phrynobatrachus	cf. steindachneri	2006	Negative			Cameroon	Northwest	Kilum-Ijim Plantlife Sanctuary
	130	Phrynobatrachidae	Phrynobatrachus	cf. steindachneri	2006	Negative			Cameroon	Northwest	Kilum-Ijim Plantlife Sanctuary
	131	Phrynobatrachidae	Phrynobatrachus	cf. steindachneri	2006	Negative			Cameroon	Northwest	Kilum-Ijim Plantlife Sanctuary
	132	Phrynobatrachidae	Phrynobatrachus	cf. steindachneri	2006	Negative			Cameroon	Northwest	Kilum-Ijim Plantlife Sanctuary
	133	Phrynobatrachidae	Phrynobatrachus	cf. steindachneri	2006	Negative			Cameroon	Northwest	Kilum-Ijim Plantlife Sanctuary
	134	Phrynobatrachidae	Phrynobatrachus	cf. steindachneri	2006	Negative			Cameroon	Northwest	Anyafouma Forest
	136	Phrynobatrachidae	Phrynobatrachus	cf. steindachneri	2006	Negative			Cameroon	Northwest	Kilum-Ijim Plantlife Sanctuary
	138	Phrynobatrachidae	Phrynobatrachus	cf. steindachneri	2006	Negative			Cameroon	Northwest	Kilum-Ijim Plantlife Sanctuary
	162	Phrynobatrachidae	Phrynobatrachus	cf. steindachneri	2006	Negative			Cameroon	Northwest	Kilum-Ijim Plantlife Sanctuary
	209	Phrynobatrachidae	Phrynobatrachus	cf. steindachneri	2006	Negative			Cameroon	Northwest	Anyafouma Forest
	213	Phrynobatrachidae	Phrynobatrachus	cf. steindachneri	2006	Negative			Cameroon	Northwest	Anyafouma Forest
	237	Phrynobatrachidae	Phrynobatrachus	cf. steindachneri	2006	Negative			Cameroon	Northwest	near forest
	260	Phrynobatrachidae	Phrynobatrachus	cf. steindachneri	2006	Negative			Cameroon	Northwest	Anyafouma Forest
	264	Phrynobatrachidae	Phrynobatrachus	cf. steindachneri	2006	Negative			Cameroon	Northwest	Anyafouma Forest
	265	Phrynobatrachidae	Phrynobatrachus	cf. steindachneri	2006	Negative			Cameroon	Northwest	Anyafouma Forest
	272	Phrynobatrachidae	Phrynobatrachus	cf. steindachneri	2006	Negative			Cameroon	Northwest	Anyafouma Forest
	289	Phrynobatrachidae	Phrynobatrachus	cf. steindachneri	2006	Negative			Cameroon	Northwest	Kilum-Ijim Plantlife Sanctuary
	293	Phrynobatrachidae	Phrynobatrachus	cf. steindachneri	2006	Negative			Cameroon	Northwest	Kilum-Ijim Plantlife Sanctuary
	294	Phrynobatrachidae	Phrynobatrachus	cf. steindachneri	2006	Negative			Cameroon	Northwest	Kilum-Ijim Plantlife Sanctuary
	331	Phrynobatrachidae	Phrynobatrachus	cf. steindachneri	2006	Negative			Cameroon	Northwest	Anyafouma Forest
	332	Phrynobatrachidae	Phrynobatrachus	cf. steindachneri	2006	Negative			Cameroon	Northwest	Anyafouma Forest
	334	Phrynobatrachidae	Phrynobatrachus	cf. steindachneri	2006	Negative			Cameroon	Northwest	Abuh Forest
	336	Phrynobatrachidae	Phrynobatrachus	cf. steindachneri	2006	Negative			Cameroon	Northwest	Abuh Forest
	29	Phrynobatrachidae	Phrynobatrachus	cf. werneri	2006	Negative			Cameroon	Northwest	Anyafouma Forest
	58	Phrynobatrachidae	Phrynobatrachus	cf. werneri	2006	Negative			Cameroon	Northwest	Anyafouma Forest
	60	Phrynobatrachidae	Phrynobatrachus	cf. werneri	2006	Negative			Cameroon	Northwest	Anyafouma Forest
	61	Phrynobatrachidae	Phrynobatrachus	cf. werneri	2006	Negative			Cameroon	Northwest	Anyafouma Forest
	62	Phrynobatrachidae	Phrynobatrachus	cf. werneri	2006	Negative			Cameroon	Northwest	Anyafouma Forest
	64	Phrynobatrachidae	Phrynobatrachus	cf. werneri	2006	Negative			Cameroon	Northwest	Anyafouma Forest
	81	Phrynobatrachidae	Phrynobatrachus	cf. werneri	2006	Negative			Cameroon	Northwest	Anyafouma Forest
	85	Phrynobatrachidae	Phrynobatrachus	cf. werneri	2006	Negative			Cameroon	Northwest	Anyafouma Forest
	89	Phrynobatrachidae	Phrynobatrachus	cf. werneri	2006	Negative			Cameroon	Northwest	Anyafouma Forest
	92	Phrynobatrachidae	Phrynobatrachus	cf. werneri	2006	Negative			Cameroon	Northwest	Anyafouma Forest
	94	Phrynobatrachidae	Phrynobatrachus	cf. werneri	2006	Negative			Cameroon	Northwest	Anyafouma Forest
	100	Phrynobatrachidae	Phrynobatrachus	cf. werneri	2006	Negative			Cameroon	Northwest	Anyafouma Forest
	109	Phrynobatrachidae	Phrynobatrachus	cf. werneri	2006	Negative			Cameroon	Northwest	Anyafouma Forest
	152	Phrynobatrachidae	Phrynobatrachus	cf. werneri	2006	Negative			Cameroon	Northwest	Anyafouma Forest
	206	Phrynobatrachidae	Phrynobatrachus	cf. werneri	2006	Negative			Cameroon	Northwest	Anyafouma Forest
	258	Phrynobatrachidae	Phrynobatrachus	cf. werneri	2006	Negative			Cameroon	Northwest	Anyafouma Forest
	267	Phrynobatrachidae	Phrynobatrachus	cf. werneri	2006	Negative			Cameroon	Northwest	Anyafouma Forest
	270	Phrynobatrachidae	Phrynobatrachus	cf. werneri	2006	Negative			Cameroon	Northwest	Abuh Forest
	273	Phrynobatrachidae	Phrynobatrachus	cf. werneri	2006	Negative			Cameroon	Northwest	Anyafouma Forest
	281	Phrynobatrachidae	Phrynobatrachus	cf. werneri	2006	Negative			Cameroon	Northwest	Abuh Forest
	284	Phrynobatrachidae	Phrynobatrachus	cf. werneri	2006	Negative			Cameroon	Northwest	Abuh Forest
	285	Phrynobatrachidae	Phrynobatrachus	cf. werneri	2006	Negative			Cameroon	Northwest	Abuh Forest
	288	Phrynobatrachidae	Phrynobatrachus	cf. werneri	2006	Negative			Cameroon	Northwest	Anyafouma Forest
	297	Phrynobatrachidae	Phrynobatrachus	cf. werneri	2006	Negative			Cameroon	Northwest	Elemighong
	304	Phrynobatrachidae	Phrynobatrachus	cf. werneri	2006	Negative			Cameroon	Northwest	Elemighong
	308	Phrynobatrachidae	Phrynobatrachus	cf. werneri	2006	Negative			Cameroon	Northwest	Anyafouma Forest
	310	Phrynobatrachidae	Phrynobatrachus	cf. werneri	2006	Negative			Cameroon	Northwest	Anyafouma Forest
	311	Phrynobatrachidae	Phrynobatrachus	cf. werneri	2006	Negative			Cameroon	Northwest	Anyafouma Forest
	314	Phrynobatrachidae	Phrynobatrachus	cf. werneri	2006	Negative			Cameroon	Northwest	Anyafouma Forest
	318	Phrynobatrachidae	Phrynobatrachus	cf. werneri	2006	Negative			Cameroon	Northwest	Anyafouma Forest
	335	Phrynobatrachidae	Phrynobatrachus	cf. werneri	2006	Negative			Cameroon	Northwest	Anyafouma Forest
	391	Phrynobatrachidae	Phrynobatrachus	cf. werneri	2006	Negative			Cameroon	Northwest	Elemighong
MCZ A-138124		Phrynobatrachidae	Phrynobatrachus	chukuchuku	2006	Negative			Cameroon	Northwest	Mt. Oku, near summit
MCZ A-138125		Phrynobatrachidae	Phrynobatrachus	chukuchuku	2006	Negative			Cameroon	Northwest	Mt. Oku, near summit
MCZ A-138126		Phrynobatrachidae	Phrynobatrachus	chukuchuku	2006	Negative			Cameroon	Northwest	Mt. Oku, near summit
MCZ A-138127		Phrynobatrachidae	Phrynobatrachus	chukuchuku	2006	Negative			Cameroon	Northwest	Mt. Oku, near summit
MCZ A-138128		Phrynobatrachidae	Phrynobatrachus	chukuchuku	2006	Negative			Cameroon	Northwest	Mt. Oku, near summit
MCZ A-138129		Phrynobatrachidae	Phrynobatrachus	chukuchuku	2006	Negative			Cameroon	Northwest	Mt. Oku, near summit
MCZ A-138130		Phrynobatrachidae	Phrynobatrachus	chukuchuku	2006	Negative			Cameroon	Northwest	Mt. Oku, near summit
MCZ A-138131		Phrynobatrachidae	Phrynobatrachus	chukuchuku	2006	Negative			Cameroon	Northwest	Mt. Oku, near summit
MCZ A-138132		Phrynobatrachidae	Phrynobatrachus	chukuchuku	2006	Negative			Cameroon	Northwest	Mt. Oku, near summit
MCZ A-138133		Phrynobatrachidae	Phrynobatrachus	chukuchuku	2006	Negative			Cameroon	Northwest	Mt. Oku, near summit
MCZ A-138134		Phrynobatrachidae	Phrynobatrachus	chukuchuku	2006	Negative			Cameroon	Northwest	Mt. Oku, near summit
MCZ A-138030		Phrynobatrachidae	Phrynobatrachus	cricogaster	2006	Negative			Cameroon	Littoral	Mt. Manengouba, Nsoung
	324	Phrynobatrachidae	Phrynobatrachus	schioetzi	2006	Negative			Cameroon	Northwest	Elemighong
	335	Phrynobatrachidae	Phrynobatrachus	schioetzi	2006	Negative			Cameroon	Northwest	Abuh Forest
MCZ A-138046		Phrynobatrachidae	Phrynobatrachus	sp.	2006	Negative			Cameroon	Littoral	Mt. Manengouba
MCZ A-138074		Phrynobatrachidae	Phrynobatrachus	sp.	2006	Negative			Cameroon	West	Mt. Bamboutos
	65	Phrynobatrachidae	Phrynobatrachus	sp.	2006	Negative			Cameroon	Northwest	Anyafouma Forest
	96	Phrynobatrachidae	Phrynobatrachus	sp.	2006	Negative			Cameroon	Northwest	Anyafouma Forest
	102	Phrynobatrachidae	Phrynobatrachus	sp.	2006	Negative			Cameroon	Northwest	Anyafouma Forest
	282	Phrynobatrachidae	Phrynobatrachus	sp.	2006	Negative			Cameroon	Northwest	Abuh Forest
	286	Phrynobatrachidae	Phrynobatrachus	sp.	2006	Negative			Cameroon	Northwest	Abuh Forest
	307	Phrynobatrachidae	Phrynobatrachus	sp.	2006	Negative			Cameroon	Northwest	Anyafouma Forest
	319	Phrynobatrachidae	Phrynobatrachus	sp.	2006	Negative			Cameroon	Northwest	Elemighong
	327	Phrynobatrachidae	Phrynobatrachus	steinadachneri	2006	Negative			Cameroon	Northwest	Anyafouma Forest
MCZ A-138021		Phrynobatrachidae	Phrynobatrachus	steindachneri	2006	Negative			Cameroon	Littoral	Mt. Manengouba, Nsoung
MCZ A-138051		Phrynobatrachidae	Phrynobatrachus	steindachneri	2006	Negative			Cameroon	Littoral	Mt. Manengouba
MCZ A-138052		Phrynobatrachidae	Phrynobatrachus	steindachneri	2006	Negative			Cameroon	Littoral	Mt. Manengouba
MCZ A-138053		Phrynobatrachidae	Phrynobatrachus	steindachneri	2006	Negative			Cameroon	Littoral	Mt. Manengouba
MCZ A-138056		Phrynobatrachidae	Phrynobatrachus	steindachneri	2006	Negative			Cameroon	Littoral	village at Mt. Mbam
MCZ A-138057		Phrynobatrachidae	Phrynobatrachus	steindachneri	2006	Negative			Cameroon	Littoral	village at Mt. Mbam
MCZ A-138058		Phrynobatrachidae	Phrynobatrachus	steindachneri	2006	Negative			Cameroon	Littoral	village at Mt. Mbam
MCZ A-138059		Phrynobatrachidae	Phrynobatrachus	steindachneri	2006	Negative			Cameroon	Littoral	village at Mt. Mbam
MCZ A-138060		Phrynobatrachidae	Phrynobatrachus	steindachneri	2006	Negative			Cameroon	Littoral	village at Mt. Mbam
MCZ A-138064		Phrynobatrachidae	Phrynobatrachus	steindachneri	2006	Negative			Cameroon	West	Mt. Bamboutos
MCZ A-138065		Phrynobatrachidae	Phrynobatrachus	steindachneri	2006	Negative			Cameroon	West	Mt. Bamboutos
MCZ A-138066		Phrynobatrachidae	Phrynobatrachus	steindachneri	2006	Negative			Cameroon	West	Mt. Bamboutos
MCZ A-138067		Phrynobatrachidae	Phrynobatrachus	steindachneri	2006	Negative			Cameroon	West	Mt. Bamboutos
MCZ A-138068		Phrynobatrachidae	Phrynobatrachus	steindachneri	2006	Negative			Cameroon	West	Mt. Bamboutos
MCZ A-138069		Phrynobatrachidae	Phrynobatrachus	steindachneri	2006	Negative			Cameroon	West	Mt. Bamboutos
MCZ A-138070		Phrynobatrachidae	Phrynobatrachus	steindachneri	2006	Negative			Cameroon	West	Mt. Bamboutos
MCZ A-138071		Phrynobatrachidae	Phrynobatrachus	steindachneri	2006	Negative			Cameroon	West	Mt. Bamboutos
MCZ A-138072		Phrynobatrachidae	Phrynobatrachus	steindachneri	2006	Negative			Cameroon	West	Mt. Bamboutos
MCZ A-138073		Phrynobatrachidae	Phrynobatrachus	steindachneri	2006	Negative			Cameroon	West	Mt. Bamboutos
MCZ A-138075		Phrynobatrachidae	Phrynobatrachus	steindachneri	2006	Negative			Cameroon	West	Bamboutos summit
MCZ A-138076		Phrynobatrachidae	Phrynobatrachus	steindachneri	2006	Negative			Cameroon	West	Bamboutos summit
MCZ A-138077		Phrynobatrachidae	Phrynobatrachus	steindachneri	2006	Negative			Cameroon	Northwest	Lake Awing
MCZ A-138078		Phrynobatrachidae	Phrynobatrachus	steindachneri	2006	Negative			Cameroon	Northwest	Lake Awing
MCZ A-138079		Phrynobatrachidae	Phrynobatrachus	steindachneri	2006	Negative			Cameroon	Northwest	Lake Awing
MCZ A-138080		Phrynobatrachidae	Phrynobatrachus	steindachneri	2006	Negative			Cameroon	Northwest	Lake Awing
MCZ A-138081		Phrynobatrachidae	Phrynobatrachus	steindachneri	2006	Negative			Cameroon	Northwest	Lake Awing
MCZ A-138104		Phrynobatrachidae	Phrynobatrachus	steindachneri	2006	Negative			Cameroon	Northwest	Elak Oku Village
MCZ A-138105		Phrynobatrachidae	Phrynobatrachus	steindachneri	2006	Negative			Cameroon	Northwest	Elak Oku Village
MCZ A-138106		Phrynobatrachidae	Phrynobatrachus	steindachneri	2006	Negative			Cameroon	Northwest	Elak Oku Village
MCZ A-138107		Phrynobatrachidae	Phrynobatrachus	steindachneri	2006	Negative			Cameroon	Northwest	Elak Oku Village
MCZ A-138108		Phrynobatrachidae	Phrynobatrachus	steindachneri	2006	Negative			Cameroon	Northwest	Elak Oku Village
MCZ A-138109		Phrynobatrachidae	Phrynobatrachus	steindachneri	2006	Negative			Cameroon	Northwest	Elak Oku Village
MCZ A-138110		Phrynobatrachidae	Phrynobatrachus	steindachneri	2006	Negative			Cameroon	Northwest	Elak Oku Village
MCZ A-138111		Phrynobatrachidae	Phrynobatrachus	steindachneri	2006	Negative			Cameroon	Northwest	Elak Oku Village
MCZ A-138112		Phrynobatrachidae	Phrynobatrachus	steindachneri	2006	Negative			Cameroon	Northwest	Elak Oku Village
MCZ A-138113		Phrynobatrachidae	Phrynobatrachus	steindachneri	2006	Negative			Cameroon	Northwest	Elak Oku Village
MCZ A-138114		Phrynobatrachidae	Phrynobatrachus	steindachneri	2006	Negative			Cameroon	Northwest	Elak Oku Village
MCZ A-138116		Phrynobatrachidae	Phrynobatrachus	steindachneri	2006	Negative			Cameroon	Northwest	Elak Oku Village
MCZ A-138117		Phrynobatrachidae	Phrynobatrachus	steindachneri	2006	Negative			Cameroon	Northwest	Elak Oku Village
MCZ A-138118		Phrynobatrachidae	Phrynobatrachus	steindachneri	2006	Negative			Cameroon	Northwest	Mt. Oku, forest reserve northeast of summit
MCZ A-138119		Phrynobatrachidae	Phrynobatrachus	steindachneri	2006	Negative			Cameroon	Northwest	Mt. Oku, forest reserve northeast of summit
MCZ A-138120		Phrynobatrachidae	Phrynobatrachus	steindachneri	2006	Negative			Cameroon	Northwest	Mt. Oku, forest reserve northeast of summit
MCZ A-138121		Phrynobatrachidae	Phrynobatrachus	steindachneri	2006	Negative			Cameroon	Northwest	Mt. Oku, forest reserve northeast of summit
MCZ A-138122		Phrynobatrachidae	Phrynobatrachus	steindachneri	2006	Negative			Cameroon	Northwest	Mt. Oku, forest reserve northeast of summit
MCZ A-138123		Phrynobatrachidae	Phrynobatrachus	steindachneri	2006	Negative			Cameroon	Northwest	Mt. Oku, near summit
MCZ A-138135		Phrynobatrachidae	Phrynobatrachus	steindachneri	2006	Negative			Cameroon	Northwest	Lake Oku
MCZ A-138136		Phrynobatrachidae	Phrynobatrachus	steindachneri	2006	Negative			Cameroon	Northwest	Lake Oku
MCZ A-138137		Phrynobatrachidae	Phrynobatrachus	steindachneri	2006	Negative			Cameroon	Northwest	Lake Oku
MCZ A-138138		Phrynobatrachidae	Phrynobatrachus	steindachneri	2006	Negative			Cameroon	Northwest	Lake Oku
MCZ A-138139		Phrynobatrachidae	Phrynobatrachus	steindachneri	2006	Negative			Cameroon	Northwest	Lake Oku
MCZ A-138140		Phrynobatrachidae	Phrynobatrachus	steindachneri	2006	Negative			Cameroon	Northwest	Lake Oku
	20	Phrynobatrachidae	Phrynobatrachus	steindachneri	2006	Negative			Cameroon	Northwest	Anyafouma Forest
	25	Phrynobatrachidae	Phrynobatrachus	steindachneri	2006	Negative			Cameroon	Northwest	Anyafouma Forest
	32	Phrynobatrachidae	Phrynobatrachus	steindachneri	2006	Negative			Cameroon	Northwest	Elemighong
	38	Phrynobatrachidae	Phrynobatrachus	steindachneri	2006	Negative			Cameroon	Northwest	Anyafouma Forest
	42	Phrynobatrachidae	Phrynobatrachus	steindachneri	2006	Negative			Cameroon	Northwest	Anyafouma Forest
	48	Phrynobatrachidae	Phrynobatrachus	steindachneri	2006	Negative			Cameroon	Northwest	Anyafouma Forest
	50	Phrynobatrachidae	Phrynobatrachus	steindachneri	2006	Negative			Cameroon	Northwest	Anyafouma Forest
	66	Phrynobatrachidae	Phrynobatrachus	steindachneri	2006	Negative			Cameroon	Northwest	Anyafouma Forest
	72	Phrynobatrachidae	Phrynobatrachus	steindachneri	2006	Negative			Cameroon	Northwest	Anyafouma Forest
	75	Phrynobatrachidae	Phrynobatrachus	steindachneri	2006	Negative			Cameroon	Northwest	Anyafouma Forest
	76	Phrynobatrachidae	Phrynobatrachus	steindachneri	2006	Negative			Cameroon	Northwest	Anyafouma Forest
	77	Phrynobatrachidae	Phrynobatrachus	steindachneri	2006	Negative			Cameroon	Northwest	Anyafouma Forest
	78	Phrynobatrachidae	Phrynobatrachus	steindachneri	2006	Negative			Cameroon	Northwest	Anyafouma Forest
	93	Phrynobatrachidae	Phrynobatrachus	steindachneri	2006	Negative			Cameroon	Northwest	Anyafouma Forest
	106	Phrynobatrachidae	Phrynobatrachus	steindachneri	2006	Negative			Cameroon	Northwest	Anyafouma Forest
	110	Phrynobatrachidae	Phrynobatrachus	steindachneri	2006	Negative			Cameroon	Northwest	Anyafouma Forest
	112	Phrynobatrachidae	Phrynobatrachus	steindachneri	2006	Negative			Cameroon	Northwest	Anyafouma Forest
	116	Phrynobatrachidae	Phrynobatrachus	steindachneri	2006	Negative			Cameroon	Northwest	Anyafouma Forest
	118	Phrynobatrachidae	Phrynobatrachus	steindachneri	2006	Negative			Cameroon	Northwest	Anyafouma Forest
	125	Phrynobatrachidae	Phrynobatrachus	steindachneri	2006	Negative			Cameroon	Northwest	Anyafouma Forest
	137	Phrynobatrachidae	Phrynobatrachus	steindachneri	2006	Negative			Cameroon	Northwest	Anyafouma Forest
	138	Phrynobatrachidae	Phrynobatrachus	steindachneri	2006	Negative			Cameroon	Northwest	Anyafouma Forest
	207	Phrynobatrachidae	Phrynobatrachus	steindachneri	2006	Negative			Cameroon	Northwest	Anyafouma Forest
	212	Phrynobatrachidae	Phrynobatrachus	steindachneri	2006	Negative			Cameroon	Northwest	Anyafouma Forest
	215	Phrynobatrachidae	Phrynobatrachus	steindachneri	2006	Negative			Cameroon	Northwest	Anyafouma Forest
	250	Phrynobatrachidae	Phrynobatrachus	steindachneri	2006	Negative			Cameroon	Northwest	Anyafouma Forest
	291	Phrynobatrachidae	Phrynobatrachus	steindachneri	2006	Negative			Cameroon	Northwest	Anyafouma Forest
	292	Phrynobatrachidae	Phrynobatrachus	steindachneri	2006	Negative			Cameroon	Northwest	Anyafouma Forest
	312	Phrynobatrachidae	Phrynobatrachus	steindachneri	2006	Negative			Cameroon	Northwest	Anyafouma Forest
	315	Phrynobatrachidae	Phrynobatrachus	steindachneri	2006	Negative			Cameroon	Northwest	Anyafouma Forest
	316	Phrynobatrachidae	Phrynobatrachus	steindachneri	2006	Negative			Cameroon	Northwest	Anyafouma Forest
	317	Phrynobatrachidae	Phrynobatrachus	steindachneri	2006	Negative			Cameroon	Northwest	Anyafouma Forest
	319	Phrynobatrachidae	Phrynobatrachus	steindachneri	2006	Negative			Cameroon	Northwest	Anyafouma Forest
	328	Phrynobatrachidae	Phrynobatrachus	steindachneri	2006	Negative			Cameroon	Northwest	Anyafouma Forest
	330	Phrynobatrachidae	Phrynobatrachus	steindachneri	2006	Negative			Cameroon	Northwest	Anyafouma Forest
	14	Phrynobatrachidae	Phrynobatrachus	werneri	2006	Negative			Cameroon	Northwest	Elemighong
	16	Phrynobatrachidae	Phrynobatrachus	werneri	2006	Negative			Cameroon	Northwest	Elemighong
	44	Phrynobatrachidae	Phrynobatrachus	werneri	2006	Negative			Cameroon	Northwest	Elemighong
	74	Phrynobatrachidae	Phrynobatrachus	werneri	2006	Negative			Cameroon	Northwest	Elemighong
	203	Phrynobatrachidae	Phrynobatrachus	werneri	2006	Negative			Cameroon	Northwest	Elemighong
	222	Phrynobatrachidae	Phrynobatrachus	werneri	2006	Negative			Cameroon	Northwest	Elemighong
	69	Pipidae	Xenopus	amieti	2006	Negative			Cameroon	Northwest	Elemighong
	219	Pipidae	Xenopus	amieti	2006	Negative			Cameroon	Northwest	Elemighong
	287	Pipidae	Xenopus	amieti	2006	Negative			Cameroon	Northwest	Elemighong
	290	Pipidae	Xenopus	amieti	2006	Negative			Cameroon	Northwest	Elemighong
	297	Pipidae	Xenopus	amieti	2006	Negative			Cameroon	Northwest	Elemighong
	179	Pipidae	Xenopus	laevis sudanensis	2006	Negative			Cameroon	Northwest	Elemighong
MCZ A-138018		Pipidae	Xenopus	longipes	2006	Negative			Cameroon	Northwest	Lake Oku
MCZ A-138019		Pipidae	Xenopus	longipes	2006	Negative			Cameroon	Northwest	Lake Oku
MCZ A-138020		Pipidae	Xenopus	longipes	2006	Negative			Cameroon	Northwest	Lake Oku
MCZ A-140474		Pipidae	Xenopus	longipes	2006	Negative			Cameroon	Northwest	Lake Oku
MCZ A-140475		Pipidae	Xenopus	longipes	2006	Negative			Cameroon	Northwest	Lake Oku
MCZ A-140476		Pipidae	Xenopus	longipes	2006	Negative			Cameroon	Northwest	Lake Oku
	9	Pipidae	Xenopus	longipes	2006	Negative			Cameroon	Northwest	Mt. Oku, Lake Oku
	19	Pipidae	Xenopus	longipes	2006	Negative			Cameroon	Northwest	Mt. Oku, Lake Oku
	23	Pipidae	Xenopus	longipes	2006	Negative			Cameroon	Northwest	Mt. Oku, Lake Oku
	24	Pipidae	Xenopus	longipes	2006	Negative			Cameroon	Northwest	Mt. Oku, Lake Oku
	26	Pipidae	Xenopus	longipes	2006	Negative			Cameroon	Northwest	Mt. Oku, Lake Oku
	27	Pipidae	Xenopus	longipes	2006	Negative			Cameroon	Northwest	Mt. Oku, Lake Oku
	30	Pipidae	Xenopus	longipes	2006	Negative			Cameroon	Northwest	Mt. Oku, Lake Oku
	31	Pipidae	Xenopus	longipes	2006	Negative			Cameroon	Northwest	Mt. Oku, Lake Oku
	141	Pipidae	Xenopus	longipes	2006	Negative			Cameroon	Northwest	Mt. Oku, Lake Oku
	142	Pipidae	Xenopus	longipes	2006	Negative			Cameroon	Northwest	Mt. Oku, Lake Oku
	143	Pipidae	Xenopus	longipes	2006	Negative			Cameroon	Northwest	Mt. Oku, Lake Oku
	144	Pipidae	Xenopus	longipes	2006	Negative			Cameroon	Northwest	Mt. Oku, Lake Oku
	145	Pipidae	Xenopus	longipes	2006	Negative			Cameroon	Northwest	Mt. Oku, Lake Oku
	146	Pipidae	Xenopus	longipes	2006	Negative			Cameroon	Northwest	Mt. Oku, Lake Oku
	147	Pipidae	Xenopus	longipes	2006	Negative			Cameroon	Northwest	Mt. Oku, Lake Oku
	148	Pipidae	Xenopus	longipes	2006	Negative			Cameroon	Northwest	Mt. Oku, Lake Oku
	149	Pipidae	Xenopus	longipes	2006	Negative			Cameroon	Northwest	Mt. Oku, Lake Oku
	150	Pipidae	Xenopus	longipes	2006	Negative			Cameroon	Northwest	Mt. Oku, Lake Oku
	151	Pipidae	Xenopus	longipes	2006	Negative			Cameroon	Northwest	Mt. Oku, Lake Oku
	153	Pipidae	Xenopus	longipes	2006	Negative			Cameroon	Northwest	Mt. Oku, Lake Oku
	154	Pipidae	Xenopus	longipes	2006	Negative			Cameroon	Northwest	Mt. Oku, Lake Oku
	155	Pipidae	Xenopus	longipes	2006	Negative			Cameroon	Northwest	Mt. Oku, Lake Oku
	156	Pipidae	Xenopus	longipes	2006	Negative			Cameroon	Northwest	Mt. Oku, Lake Oku
	157	Pipidae	Xenopus	longipes	2006	Negative			Cameroon	Northwest	Mt. Oku, Lake Oku
	158	Pipidae	Xenopus	longipes	2006	Negative			Cameroon	Northwest	Mt. Oku, Lake Oku
	159	Pipidae	Xenopus	longipes	2006	Negative			Cameroon	Northwest	Mt. Oku, Lake Oku
	160	Pipidae	Xenopus	longipes	2006	Negative			Cameroon	Northwest	Mt. Oku, Lake Oku
	161	Pipidae	Xenopus	longipes	2006	Negative			Cameroon	Northwest	Mt. Oku, Lake Oku
	163	Pipidae	Xenopus	longipes	2006	Negative			Cameroon	Northwest	Mt. Oku, Lake Oku
	164	Pipidae	Xenopus	longipes	2006	Negative			Cameroon	Northwest	Mt. Oku, Lake Oku
	165	Pipidae	Xenopus	longipes	2006	Negative			Cameroon	Northwest	Mt. Oku, Lake Oku
	166	Pipidae	Xenopus	longipes	2006	Negative			Cameroon	Northwest	Mt. Oku, Lake Oku
	167	Pipidae	Xenopus	longipes	2006	Negative			Cameroon	Northwest	Mt. Oku, Lake Oku
	168	Pipidae	Xenopus	longipes	2006	Negative			Cameroon	Northwest	Mt. Oku, Lake Oku
	169	Pipidae	Xenopus	longipes	2006	Negative			Cameroon	Northwest	Mt. Oku, Lake Oku
	170	Pipidae	Xenopus	longipes	2006	Negative			Cameroon	Northwest	Mt. Oku, Lake Oku
	171	Pipidae	Xenopus	longipes	2006	Negative			Cameroon	Northwest	Mt. Oku, Lake Oku
	172	Pipidae	Xenopus	longipes	2006	Negative			Cameroon	Northwest	Mt. Oku, Lake Oku
	173	Pipidae	Xenopus	longipes	2006	Negative			Cameroon	Northwest	Mt. Oku, Lake Oku
	174	Pipidae	Xenopus	longipes	2006	Negative			Cameroon	Northwest	Mt. Oku, Lake Oku
	175	Pipidae	Xenopus	longipes	2006	Negative			Cameroon	Northwest	Mt. Oku, Lake Oku
	176	Pipidae	Xenopus	longipes	2006	Negative			Cameroon	Northwest	Mt. Oku, Lake Oku
	177	Pipidae	Xenopus	longipes	2006	Negative			Cameroon	Northwest	Mt. Oku, Lake Oku
	178	Pipidae	Xenopus	longipes	2006	Negative			Cameroon	Northwest	Mt. Oku, Lake Oku
	180	Pipidae	Xenopus	longipes	2006	Negative			Cameroon	Northwest	Mt. Oku, Lake Oku
	182	Pipidae	Xenopus	longipes	2006	Negative			Cameroon	Northwest	Mt. Oku, Lake Oku
	183	Pipidae	Xenopus	longipes	2006	Negative			Cameroon	Northwest	Mt. Oku, Lake Oku
	184	Pipidae	Xenopus	longipes	2006	Negative			Cameroon	Northwest	Mt. Oku, Lake Oku
	185	Pipidae	Xenopus	longipes	2006	Negative			Cameroon	Northwest	Mt. Oku, Lake Oku
	186	Pipidae	Xenopus	longipes	2006	Negative			Cameroon	Northwest	Mt. Oku, Lake Oku
	187	Pipidae	Xenopus	longipes	2006	Negative			Cameroon	Northwest	Mt. Oku, Lake Oku
	188	Pipidae	Xenopus	longipes	2006	Negative			Cameroon	Northwest	Mt. Oku, Lake Oku
	189	Pipidae	Xenopus	longipes	2006	Negative			Cameroon	Northwest	Mt. Oku, Lake Oku
	190	Pipidae	Xenopus	longipes	2006	Negative			Cameroon	Northwest	Mt. Oku, Lake Oku
	191	Pipidae	Xenopus	longipes	2006	Negative			Cameroon	Northwest	Mt. Oku, Lake Oku
	192	Pipidae	Xenopus	longipes	2006	Negative			Cameroon	Northwest	Mt. Oku, Lake Oku
	193	Pipidae	Xenopus	longipes	2006	Negative			Cameroon	Northwest	Mt. Oku, Lake Oku
	194	Pipidae	Xenopus	longipes	2006	Negative			Cameroon	Northwest	Mt. Oku, Lake Oku
	195	Pipidae	Xenopus	longipes	2006	Negative			Cameroon	Northwest	Mt. Oku, Lake Oku
	196	Pipidae	Xenopus	longipes	2006	Negative			Cameroon	Northwest	Mt. Oku, Lake Oku
	197	Pipidae	Xenopus	longipes	2006	Negative			Cameroon	Northwest	Mt. Oku, Lake Oku
	199	Pipidae	Xenopus	longipes	2006	Negative			Cameroon	Northwest	Mt. Oku, Lake Oku
	200	Pipidae	Xenopus	longipes	2006	Negative			Cameroon	Northwest	Mt. Oku, Lake Oku
	124	Pipidae	Xenopus	sp.	2006	Negative			Cameroon	Northwest	Elemighong
	259	Pipidae	Xenopus	sp.	2006	Negative			Cameroon	Northwest	Elemighong
	320	Ptychadenidae	Ptychadena	sp.	2006	Negative			Cameroon	Northwest	Elemighong
	301, 305	Scolecomorphidae	Crotaphatrema	lamottei	2006	Negative			Cameroon	Northwest	Anyafouma Forest
	139	Unknown	Unidentified	sp.	2006	Negative			Cameroon	Northwest	Anyafouma Forest
	198	Unknown	Unidentified	sp.	2006	Negative			Cameroon	Northwest	Anyafouma Forest
	CA2008 5	Arthroleptidae	Astylosternus	ranoides	2008	Negative			Cameroon	Northwest	Lake Oku Crater
	field samples	Arthroleptidae	Arthroleptis	cf. adelphus	2007/2008	Negative			Cameroon	Littoral/Southwest	Mt. Manengouba
	field samples	Arthroleptidae	Arthroleptis	perreti	2007/2008	Negative			Cameroon	Littoral/Southwest	Mt. Manengouba
	field samples	Arthroleptidae	Arthroleptis	sp.	2007/2008	Negative			Cameroon	Littoral/Southwest	Mt. Manengouba
	field samples	Arthroleptidae	Arthroleptis	variabilis	2007/2008	Negative			Cameroon	Littoral/Southwest	Mt. Manengouba
	field samples	Arthroleptidae	Astylosternus	montanus	2007/2008	Negative			Cameroon	Littoral/Southwest	Mt. Manengouba
	field samples	Arthroleptidae	Astylosternus	perreti	2007/2008	Negative			Cameroon	Littoral/Southwest	Mt. Manengouba
	field samples	Arthroleptidae	Astylosternus	rheophilus	2007/2008	Negative			Cameroon	Littoral/Southwest	Mt. Manengouba
	field samples	Arthroleptidae	Astylosternus	sp.	2007/2008	Negative			Cameroon	Littoral/Southwest	Mt. Manengouba
	field samples	Arthroleptidae	Cardioglossa	elegans	2007/2008	Negative			Cameroon	Littoral/Southwest	Mt. Manengouba
	field samples	Arthroleptidae	Cardioglossa	manengouba	2007/2008	Negative			Cameroon	Littoral/Southwest	Mt. Manengouba
	field samples	Arthroleptidae	Cardioglossa	melanogaster	2007/2008	Negative			Cameroon	Littoral/Southwest	Mt. Manengouba
	field samples	Arthroleptidae	Cardioglossa	trifasciata	2007/2008	Negative			Cameroon	Littoral/Southwest	Mt. Manengouba
	field samples	Arthroleptidae	Cardioglossa	venusta	2007/2008	Negative			Cameroon	Littoral/Southwest	Mt. Manengouba
	field samples	Arthroleptidae	Leptodactylodon	cf. boulengeri	2007/2008	Negative			Cameroon	Littoral/Southwest	Mt. Manengouba
	field samples	Arthroleptidae	Leptodactylodon	erythrogaster	2007/2008	Negative			Cameroon	Littoral/Southwest	Mt. Manengouba
	field samples	Arthroleptidae	Leptodactylodon	mertensi	2007/2008	Negative			Cameroon	Littoral/Southwest	Mt. Manengouba
	field samples	Arthroleptidae	Leptopelis	modestus	2007/2008	Negative			Cameroon	Littoral/Southwest	Mt. Manengouba
	field samples	Arthroleptidae	Trichobatrachus	robbustus	2007/2008	Negative			Cameroon	Littoral/Southwest	Mt. Manengouba
	field samples	Bufonidae	Amietophrynus	villiersi	2007/2008	Negative			Cameroon	Littoral/Southwest	Mt. Manengouba
	field samples	Bufonidae	Werneria	bambutensis	2007/2008	Negative			Cameroon	Littoral/Southwest	Mt. Manengouba
	field samples	Bufonidae	Werneria	mertensiana	2007/2008	Negative			Cameroon	Littoral/Southwest	Mt. Manengouba
	field samples	Bufonidae	Werneria	tandyi	2007/2008	Negative			Cameroon	Littoral/Southwest	Mt. Manengouba
	field samples	Bufonidae	Wolterstorffina	parvipalmata	2007/2008	Negative			Cameroon	Littoral/Southwest	Mt. Manengouba
	field samples	Conrauidae	Conraua	robusta	2007/2008	Negative			Cameroon	Littoral/Southwest	Mt. Manengouba
	field samples	Hyperoliidae	Afrixalus	lacteus	2007/2008	Negative			Cameroon	Littoral/Southwest	Mt. Manengouba
	field samples	Hyperoliidae	Afrixalus	paradorsalis	2007/2008	Negative			Cameroon	Littoral/Southwest	Mt. Manengouba
	field samples	Hyperoliidae	Afrixalus	paradorsalis manengoubensis	2007/2008	Negative			Cameroon	Littoral/Southwest	Mt. Manengouba
	field samples	Hyperoliidae	Hyperolius	adametzi	2007/2008	Negative			Cameroon	Littoral/Southwest	Mt. Manengouba
	field samples	Hyperoliidae	Hyperolius	camerunensis	2007/2008	Negative			Cameroon	Littoral/Southwest	Mt. Manengouba
	field samples	Hyperoliidae	Hyperolius	sp. 1	2007/2008	Negative			Cameroon	Littoral/Southwest	Mt. Manengouba
	field samples	Hyperoliidae	Hyperolius	viridistriatus	2007/2008	Negative			Cameroon	Littoral/Southwest	Mt. Manengouba
	field samples	Hyperoliidae	Kassina	decorata	2007/2008	Negative			Cameroon	Littoral/Southwest	Mt. Manengouba
	field samples	Petropedetidae	Petropedetes	perreti	2007/2008	Negative			Cameroon	Littoral/Southwest	Mt. Manengouba
	field samples	Phrynobatrachidae	Phrynobatrachus	batesii	2007/2008	Negative			Cameroon	Littoral/Southwest	Mt. Manengouba
	field samples	Phrynobatrachidae	Phrynobatrachus	cf. sandersoni	2007/2008	Negative			Cameroon	Littoral/Southwest	Mt. Manengouba
	field samples	Phrynobatrachidae	Phrynobatrachus	cricogaster	2007/2008	Negative			Cameroon	Littoral/Southwest	Mt. Manengouba
	field samples	Phrynobatrachidae	Phrynobatrachus	manengoubensis	2007/2008	Negative			Cameroon	Littoral/Southwest	Mt. Manengouba
	field samples	Phrynobatrachidae	Phrynobatrachus	sp.	2007/2008	Negative			Cameroon	Littoral/Southwest	Mt. Manengouba
	field samples	Phrynobatrachidae	Phrynobatrachus	steindachneri	2007/2008	Negative			Cameroon	Littoral/Southwest	Mt. Manengouba
	field samples	Phrynobatrachidae	Phrynobatrachus	africanus	2007/2008	Negative			Cameroon	Littoral/Southwest	Mt. Manengouba
	field samples	Pipidae	Xenopus	amieti	2007/2008	Negative			Cameroon	Littoral/Southwest	Mt. Manengouba
	field samples	Ptychadenidae	Ptychadena	sp.	2007/2008	Negative			Cameroon	Littoral/Southwest	Mt. Manengouba
	field samples	Ranidae	Hylarana	sp.	2007/2008	Negative			Cameroon	Littoral/Southwest	Mt. Manengouba
	CA2008 2	Arthroleptidae	Astylosternus	ranoides	2008	Positive	30.9127	0.386409	Cameroon	Northwest	Lake Oku Crater
	CA2008 3	Arthroleptidae	Trichobatrachus	robustus	2008	Negative			Cameroon	Northwest	Mbam-Oku
	CA2008 4	Bufonidae	Amietophrynus		2008	Negative			Cameroon	Northwest	Jikijem
	CA2008 181	Bufonidae	Wolsterstorffina	mirei	2008	Positive	721.198	9.01498	Cameroon	Northwest	near Lake Oku
	CA2008 182	Hyperoliidae	Hyperolius	riggenbachi	2008	Positive	142.02	1.77525	Cameroon	Northwest	Anyajua
	CA2008 185	Hyperoliidae	Hyperolius	riggenbachi	2008	Positive	295.498	3.69373	Cameroon	Northwest	Anyajua
	CA2008 17	Phrynobatrachidae	Phrynobatrachus	cf. steindachneri	2008	Negative			Cameroon	Northwest	Lake Oku Crater
	CA2008 172	Phrynobatrachidae	Phrynobatrachus	cf. steindachneri	2008	Negative			Cameroon	Northwest	stream in farmland
	CA2008 174	Phrynobatrachidae	Phrynobatrachus	cf. steindachneri	2008	Negative			Cameroon	Northwest	Lake Oku Crater
	CA2008 18	Phrynobatrachidae	Phrynobatrachus	cf. steindachneri	2008	Negative			Cameroon	Northwest	Lake Oku Crater
	CA2008 25	Phrynobatrachidae	Phrynobatrachus	cf. steindachneri	2008	Negative			Cameroon	Northwest	stream in farmland
	CA2008 26	Phrynobatrachidae	Phrynobatrachus	cf. steindachneri	2008	Negative			Cameroon	Northwest	Lake Oku Crater
	CA2008 38	Phrynobatrachidae	Phrynobatrachus	cf. steindachneri	2008	Negative			Cameroon	Northwest	Lake Oku Crater
	CA2008 55	Phrynobatrachidae	Phrynobatrachus	cf. steindachneri	2008	Negative			Cameroon	Northwest	Lake Oku Crater
	CA2008 65	Phrynobatrachidae	Phrynobatrachus	cf. steindachneri	2008	Negative			Cameroon	Northwest	Lake Oku Crater
	CA2008 164	Phrynobatrachidae	Phrynobatrachus	cf. steindachneri	2008	Positive	84	1.05	Cameroon	Northwest	stream in farmland
	CA2008 169	Phrynobatrachidae	Phrynobatrachus	cf. steindachneri	2008	Positive	615.429	7.69286	Cameroon	Northwest	stream in farmland
	CA2008 183	Phrynobatrachidae	Phrynobatrachus	cf. steindachneri	2008	Positive	71.068	0.88835	Cameroon	Northwest	stream in farmland
	CA2008 188	Phrynobatrachidae	Phrynobatrachus	cf. steindachneri	2008	Positive	133.532	1.66915	Cameroon	Northwest	stream in farmland
	CA2008 45	Phrynobatrachidae	Phrynobatrachus	cf. steindachneri	2008	Positive	1.192	0.0149	Cameroon	Northwest	Lake Oku Crater
	CA2008 47	Phrynobatrachidae	Phrynobatrachus	cf. steindachneri	2008	Positive	13.0513	0.163141	Cameroon	Northwest	Lake Oku Crater
	CA2008 61	Phrynobatrachidae	Phrynobatrachus	cf. steindachneri	2008	Positive	451.766	5.64708	Cameroon	Northwest	Lake Oku Crater
	CA2008 6	Phrynobatrachidae	Phrynobatrachus	cf. werneri	2008	Negative			Cameroon	Northwest	Lake Oku Crater
	CA2008 167	Phrynobatrachidae	Phrynobatrachus	sp.	2008	Positive	148.552	1.8569	Cameroon	Northwest	stream in farmland
	CA2008 43	Phrynobatrachidae	Phrynobatrachus	sp.	2008	Positive	3.47163	0.0433954	Cameroon	Northwest	Lake Oku Crater
	174	Phrynobatrachidae	Phrynobatrachus	steindachneri	2008	Negative			Cameroon	Northwest	Mt. Oku, Lake Oku
	CA2008 1	Phrynobatrachidae	Phrynobatrachus	steindachneri	2008	Negative			Cameroon	Northwest	Elak-Oku
	CA2008 166	Phrynobatrachidae	Phrynobatrachus	werneri	2008	Negative			Cameroon	Northwest	Anyajua
	CA2008 168	Phrynobatrachidae	Phrynobatrachus	werneri	2008	Positive	744.278	9.30347	Cameroon	Northwest	Anyajua
	CA2008 170	Phrynobatrachidae	Phrynobatrachus	werneri	2008	Positive	429.873	5.37341	Cameroon	Northwest	Anyajua
	CA2008 186	Phrynobatrachidae	Phrynobatrachus	werneri	2008	Positive	127.287	1.59109	Cameroon	Northwest	Anyajua
	CA2008 187	Phrynobatrachidae	Phrynobatrachus	werneri	2008	Positive	152.142	1.90177	Cameroon	Northwest	Anyajua
BMNH 2008.441		Pipidae	Xenopus	longipes	2008	Negative			Cameroon	Northwest	Mt. Oku, Lake Oku
	4562	Pipidae	Xenopus	longipes	2008	Negative			Cameroon	Northwest	Mt. Oku, Lake Oku
	4563	Pipidae	Xenopus	longipes	2008	Negative			Cameroon	Northwest	Mt. Oku, Lake Oku
	4565	Pipidae	Xenopus	longipes	2008	Negative			Cameroon	Northwest	Mt. Oku, Lake Oku
	4568	Pipidae	Xenopus	longipes	2008	Negative			Cameroon	Northwest	Mt. Oku, Lake Oku
	4569	Pipidae	Xenopus	longipes	2008	Negative			Cameroon	Northwest	Mt. Oku, Lake Oku
	4570	Pipidae	Xenopus	longipes	2008	Negative			Cameroon	Northwest	Mt. Oku, Lake Oku
	4571	Pipidae	Xenopus	longipes	2008	Negative			Cameroon	Northwest	Mt. Oku, Lake Oku
	4572	Pipidae	Xenopus	longipes	2008	Negative			Cameroon	Northwest	Mt. Oku, Lake Oku
	4573	Pipidae	Xenopus	longipes	2008	Negative			Cameroon	Northwest	Mt. Oku, Lake Oku
	4581	Pipidae	Xenopus	longipes	2008	Negative			Cameroon	Northwest	Mt. Oku, Lake Oku
	4582	Pipidae	Xenopus	longipes	2008	Negative			Cameroon	Northwest	Mt. Oku, Lake Oku
	4583	Pipidae	Xenopus	longipes	2008	Negative			Cameroon	Northwest	Mt. Oku, Lake Oku
	4584	Pipidae	Xenopus	longipes	2008	Negative			Cameroon	Northwest	Mt. Oku, Lake Oku
	4585	Pipidae	Xenopus	longipes	2008	Negative			Cameroon	Northwest	Mt. Oku, Lake Oku
	4588	Pipidae	Xenopus	longipes	2008	Negative			Cameroon	Northwest	Mt. Oku, Lake Oku
	4589	Pipidae	Xenopus	longipes	2008	Negative			Cameroon	Northwest	Mt. Oku, Lake Oku
	4590	Pipidae	Xenopus	longipes	2008	Negative			Cameroon	Northwest	Mt. Oku, Lake Oku
	5725	Pipidae	Xenopus	longipes	2008	Negative			Cameroon	Northwest	Mt. Oku, Lake Oku
	5726	Pipidae	Xenopus	longipes	2008	Negative			Cameroon	Northwest	Mt. Oku, Lake Oku
	5727	Pipidae	Xenopus	longipes	2008	Negative			Cameroon	Northwest	Mt. Oku, Lake Oku
	5742	Pipidae	Xenopus	longipes	2008	Negative			Cameroon	Northwest	Mt. Oku, Lake Oku
	5743	Pipidae	Xenopus	longipes	2008	Negative			Cameroon	Northwest	Mt. Oku, Lake Oku
	5745	Pipidae	Xenopus	longipes	2008	Negative			Cameroon	Northwest	Mt. Oku, Lake Oku
	5746	Pipidae	Xenopus	longipes	2008	Negative			Cameroon	Northwest	Mt. Oku, Lake Oku
	5747	Pipidae	Xenopus	longipes	2008	Negative			Cameroon	Northwest	Mt. Oku, Lake Oku
	5748	Pipidae	Xenopus	longipes	2008	Negative			Cameroon	Northwest	Mt. Oku, Lake Oku
	5749	Pipidae	Xenopus	longipes	2008	Negative			Cameroon	Northwest	Mt. Oku, Lake Oku
	5750	Pipidae	Xenopus	longipes	2008	Negative			Cameroon	Northwest	Mt. Oku, Lake Oku
	5884	Pipidae	Xenopus	longipes	2008	Negative			Cameroon	Northwest	Mt. Oku, Lake Oku
	5885	Pipidae	Xenopus	longipes	2008	Negative			Cameroon	Northwest	Mt. Oku, Lake Oku
	5907	Pipidae	Xenopus	longipes	2008	Negative			Cameroon	Northwest	Mt. Oku, Lake Oku
	5909	Pipidae	Xenopus	longipes	2008	Negative			Cameroon	Northwest	Mt. Oku, Lake Oku
	5910	Pipidae	Xenopus	longipes	2008	Negative			Cameroon	Northwest	Mt. Oku, Lake Oku
	5911	Pipidae	Xenopus	longipes	2008	Negative			Cameroon	Northwest	Mt. Oku, Lake Oku
	5912	Pipidae	Xenopus	longipes	2008	Negative			Cameroon	Northwest	Mt. Oku, Lake Oku
	XL08-1	Pipidae	Xenopus	longipes	2008	Negative			Cameroon	Northwest	Mt. Oku, Lake Oku
	XL08-2	Pipidae	Xenopus	longipes	2008	Negative			Cameroon	Northwest	Mt. Oku, Lake Oku
	XL08-3	Pipidae	Xenopus	longipes	2008	Negative			Cameroon	Northwest	Mt. Oku, Lake Oku
	CD 574	Pipidae	Xenopus	longipes	2008	Negative			Cameroon	Northwest	Mt. Oku, Lake Oku
	CD 575	Pipidae	Xenopus	longipes	2008	Negative			Cameroon	Northwest	Mt. Oku, Lake Oku
	CD 656	Pipidae	Xenopus	longipes	2008	Negative			Cameroon	Northwest	Mt. Oku, Lake Oku
	CD 657	Pipidae	Xenopus	longipes	2008	Negative			Cameroon	Northwest	Mt. Oku, Lake Oku
	CD 658	Pipidae	Xenopus	longipes	2008	Negative			Cameroon	Northwest	Mt. Oku, Lake Oku
	CD 659	Pipidae	Xenopus	longipes	2008	Negative			Cameroon	Northwest	Mt. Oku, Lake Oku
	CD 660	Pipidae	Xenopus	longipes	2008	Negative			Cameroon	Northwest	Mt. Oku, Lake Oku
	CD 661	Pipidae	Xenopus	longipes	2008	Negative			Cameroon	Northwest	Mt. Oku, Lake Oku
	CD 662	Pipidae	Xenopus	longipes	2008	Negative			Cameroon	Northwest	Mt. Oku, Lake Oku
	CD 663	Pipidae	Xenopus	longipes	2008	Negative			Cameroon	Northwest	Mt. Oku, Lake Oku
	CD 664	Pipidae	Xenopus	longipes	2008	Negative			Cameroon	Northwest	Mt. Oku, Lake Oku
	CD 665	Pipidae	Xenopus	longipes	2008	Negative			Cameroon	Northwest	Mt. Oku, Lake Oku
	CD 666	Pipidae	Xenopus	longipes	2008	Negative			Cameroon	Northwest	Mt. Oku, Lake Oku
	CD 667	Pipidae	Xenopus	longipes	2008	Negative			Cameroon	Northwest	Mt. Oku, Lake Oku
	CD 668	Pipidae	Xenopus	longipes	2008	Negative			Cameroon	Northwest	Mt. Oku, Lake Oku
	CD 669	Pipidae	Xenopus	longipes	2008	Negative			Cameroon	Northwest	Mt. Oku, Lake Oku
	CD 670	Pipidae	Xenopus	longipes	2008	Negative			Cameroon	Northwest	Mt. Oku, Lake Oku
	CD 671	Pipidae	Xenopus	longipes	2008	Negative			Cameroon	Northwest	Mt. Oku, Lake Oku
	CD 672	Pipidae	Xenopus	longipes	2008	Negative			Cameroon	Northwest	Mt. Oku, Lake Oku
	CD 673	Pipidae	Xenopus	longipes	2008	Negative			Cameroon	Northwest	Mt. Oku, Lake Oku
	CD 674	Pipidae	Xenopus	longipes	2008	Negative			Cameroon	Northwest	Mt. Oku, Lake Oku
	CD 675	Pipidae	Xenopus	longipes	2008	Negative			Cameroon	Northwest	Mt. Oku, Lake Oku
	CD 676	Pipidae	Xenopus	longipes	2008	Negative			Cameroon	Northwest	Mt. Oku, Lake Oku
	CD 677	Pipidae	Xenopus	longipes	2008	Negative			Cameroon	Northwest	Mt. Oku, Lake Oku
	CD 678	Pipidae	Xenopus	longipes	2008	Negative			Cameroon	Northwest	Mt. Oku, Lake Oku
	CD 679	Pipidae	Xenopus	longipes	2008	Negative			Cameroon	Northwest	Mt. Oku, Lake Oku
	CD 680	Pipidae	Xenopus	longipes	2008	Negative			Cameroon	Northwest	Mt. Oku, Lake Oku
	CD 681	Pipidae	Xenopus	longipes	2008	Negative			Cameroon	Northwest	Mt. Oku, Lake Oku
	CD 682	Pipidae	Xenopus	longipes	2008	Negative			Cameroon	Northwest	Mt. Oku, Lake Oku
	CD 683	Pipidae	Xenopus	longipes	2008	Negative			Cameroon	Northwest	Mt. Oku, Lake Oku
	CD 684	Pipidae	Xenopus	longipes	2008	Negative			Cameroon	Northwest	Mt. Oku, Lake Oku
	CD 685	Pipidae	Xenopus	longipes	2008	Negative			Cameroon	Northwest	Mt. Oku, Lake Oku
	CD 686	Pipidae	Xenopus	longipes	2008	Negative			Cameroon	Northwest	Mt. Oku, Lake Oku
	CD 687	Pipidae	Xenopus	longipes	2008	Negative			Cameroon	Northwest	Mt. Oku, Lake Oku
	CD 688	Pipidae	Xenopus	longipes	2008	Negative			Cameroon	Northwest	Mt. Oku, Lake Oku
	CD 689	Pipidae	Xenopus	longipes	2008	Negative			Cameroon	Northwest	Mt. Oku, Lake Oku
	CD 690	Pipidae	Xenopus	longipes	2008	Negative			Cameroon	Northwest	Mt. Oku, Lake Oku
	CD 691	Pipidae	Xenopus	longipes	2008	Negative			Cameroon	Northwest	Mt. Oku, Lake Oku
	CD 692	Pipidae	Xenopus	longipes	2008	Negative			Cameroon	Northwest	Mt. Oku, Lake Oku
	CA2008 12	Pipidae	Xenopus	sp. nov.	2008	Negative			Cameroon	Northwest	Elak-Oku
	CA2008 15	Pipidae	Xenopus	sp. nov.	2008	Negative			Cameroon	Northwest	Elak-Oku
	CA2008 16	Pipidae	Xenopus	sp. nov.	2008	Negative			Cameroon	Northwest	Elak-Oku
	CA2008 171	Pipidae	Xenopus	sp. nov.	2008	Negative			Cameroon	Northwest	Anyajua
	CA2008 21	Pipidae	Xenopus	sp. nov.	2008	Negative			Cameroon	Northwest	Elak-Oku
	CA2008 24	Pipidae	Xenopus	sp. nov.	2008	Negative			Cameroon	Northwest	Elak-Oku
	CA2008 28	Pipidae	Xenopus	sp. nov.	2008	Negative			Cameroon	Northwest	Elak-Oku
	CA2008 30	Pipidae	Xenopus	sp. nov.	2008	Negative			Cameroon	Northwest	Elak-Oku
	CA2008 34	Pipidae	Xenopus	sp. nov.	2008	Negative			Cameroon	Northwest	Elak-Oku
	CA2008 35	Pipidae	Xenopus	sp. nov.	2008	Negative			Cameroon	Northwest	Elak-Oku
	CA2008 36	Pipidae	Xenopus	sp. nov.	2008	Negative			Cameroon	Northwest	Elak-Oku
	CA2008 37	Pipidae	Xenopus	sp. nov.	2008	Negative			Cameroon	Northwest	Elak-Oku
	CA2008 39	Pipidae	Xenopus	sp. nov.	2008	Negative			Cameroon	Northwest	Elak-Oku
	CA2008 40	Pipidae	Xenopus	sp. nov.	2008	Negative			Cameroon	Northwest	Elak-Oku
	CA2008 41	Pipidae	Xenopus	sp. nov.	2008	Negative			Cameroon	Northwest	Elak-Oku
	CA2008 42	Pipidae	Xenopus	sp. nov.	2008	Negative			Cameroon	Northwest	Elak-Oku
	CA2008 46	Pipidae	Xenopus	sp. nov.	2008	Negative			Cameroon	Northwest	Elak-Oku
	CA2008 7	Pipidae	Xenopus	sp. nov.	2008	Negative			Cameroon	Northwest	Elak-Oku
	CA2008 8	Pipidae	Xenopus	sp. nov.	2008	Negative			Cameroon	Northwest	Elak-Oku
	CA2008 9	Pipidae	Xenopus	sp. nov.	2008	Negative			Cameroon	Northwest	Elak-Oku
	CA2008 CAXAO	Pipidae	Xenopus	sp. nov.	2008	Negative			Cameroon	Northwest	Anyajua
	CA2008 158	Pipidae	Xenopus	sp. nov.	2008	Positive	226.4	2.83	Cameroon	Northwest	Anyajua
	CA2008 178	Pipidae	Xenopus	sp. nov.	2008	Positive	756.159	9.45199	Cameroon	Northwest	Anyajua
	CA2008 25	Pipidae	Xenopus	sp. nov.	2008	Positive	2.12975	0.0266219	Cameroon	Northwest	Elak-Oku
	CA2008 33	Pipidae	Xenopus	sp. nov.	2008	Positive	0.332722	0.00415903	Cameroon	Northwest	Elak-Oku
	CA2008 50	Pipidae	Xenopus	sp. nov.	2008	Positive	659.793	8.24741	Cameroon	Northwest	Elak-Oku
	CA2008 52	Pipidae	Xenopus	sp. nov.	2008	Positive	928.304	11.6038	Cameroon	Northwest	Elak-Oku
	CA2008 56	Pipidae	Xenopus	sp. nov.	2008	Positive	531.614	6.64518	Cameroon	Northwest	Elak-Oku
	CA2008 57	Pipidae	Xenopus	sp. nov.	2008	Positive	498.671	6.23339	Cameroon	Northwest	Elak-Oku
	CA2008 58	Pipidae	Xenopus	sp. nov.	2008	Positive	824.928	10.3116	Cameroon	Northwest	Elak-Oku
	CA2008 59	Pipidae	Xenopus	sp. nov.	2008	Positive	603.985	7.54981	Cameroon	Northwest	Elak-Oku
	CA2008 19	Scolecomorphidae	Crotaphatrema	lamoteii	2008	Negative			Cameroon	Northwest	Kissotin
	CA2008 23	Scolecomorphidae	Crotaphatrema	lamoteii	2008	Negative			Cameroon	Northwest	Oku
	CA2008 51	Scolecomorphidae	Crotaphatrema	lamoteii	2008	Negative			Cameroon	Northwest	In farm on forest edge, 731m from lake
	CA2008 54	Scolecomorphidae	Crotaphatrema	lamoteii	2008	Negative			Cameroon	Northwest	farm near forest by Lake
	CA2008 20	Scolecomorphidae	Crotaphatrema	lamoteii	2008	Positive	5.7457	0.0718212	Cameroon	Northwest	Kissotin
	CA2008 48	Scolecomorphidae	Crotaphatrema	lamoteii	2008	Positive	497.203	6.21504	Cameroon	Northwest	farm near forest by Lake
	CA2009 84	Arthroleptidae	Astylosternus	montanus	2009	Negative			Cameroon	Northwest	Afua Swamp
	CA2009 125	Arthroleptidae	Astylosternus	ranoides	2009	Negative			Cameroon	Northwest	Kilum-Ijim Plantlife Sanctuary
	CA2009 114	Arthroleptidae	Leptodactylodon	perreti	2009	Negative			Cameroon	Northwest	near Mt. Oku summit
	CA2009 98	Bufonidae	Wolterstorffina	mirei	2009	Negative			Cameroon	Northwest	Ijim Forest (community forest)
	"XLD 7"	Pipidae	Xenopus	longipes	2009	Negative			Cameroon	Northwest	Mt. Oku, Lake Oku
	XLD 1	Pipidae	Xenopus	longipes	2009	Negative			Cameroon	Northwest	Mt. Oku, Lake Oku
	XLD 2	Pipidae	Xenopus	longipes	2009	Negative			Cameroon	Northwest	Mt. Oku, Lake Oku
	XLD 3	Pipidae	Xenopus	longipes	2009	Negative			Cameroon	Northwest	Mt. Oku, Lake Oku
	XLD 4	Pipidae	Xenopus	longipes	2009	Negative			Cameroon	Northwest	Mt. Oku, Lake Oku
	XLD 5	Pipidae	Xenopus	longipes	2009	Negative			Cameroon	Northwest	Mt. Oku, Lake Oku
	XLD 6	Pipidae	Xenopus	longipes	2009	Negative			Cameroon	Northwest	Mt. Oku, Lake Oku
	XLD 7	Pipidae	Xenopus	longipes	2009	Negative			Cameroon	Northwest	Mt. Oku, Lake Oku
	XLD 8	Pipidae	Xenopus	longipes	2009	Negative			Cameroon	Northwest	Mt. Oku, Lake Oku
	1 XLD 9	Pipidae	Xenopus	longipes	2009	Negative			Cameroon	Northwest	Mt. Oku, Lake Oku
	CA2009 120	Ptychadenidae	Ptychadena	sp.	2009	Negative			Cameroon	Northwest	Afua Swamp
	CA2009 124	Ptychadenidae	Ptychadena	sp.	2009	Negative			Cameroon	Northwest	Kissotin
	MM104	Arthroleptidae	Arthroleptis	perreti	2011	Negative			Cameroon	Littoral	Mt. Manengouba
	MM26	Arthroleptidae	Arthroleptis	perreti	2011	Negative			Cameroon	Littoral	Mt. Manengouba
	MM27	Arthroleptidae	Arthroleptis	perreti	2011	Negative			Cameroon	Littoral	Mt. Manengouba
	MM29	Arthroleptidae	Arthroleptis	perreti	2011	Negative			Cameroon	Littoral	Mt. Manengouba
	MM30	Arthroleptidae	Arthroleptis	perreti	2011	Negative			Cameroon	Littoral	Mt. Manengouba
	MM33	Arthroleptidae	Arthroleptis	perreti	2011	Negative			Cameroon	Littoral	Mt. Manengouba
	MM34	Arthroleptidae	Arthroleptis	perreti	2011	Negative			Cameroon	Littoral	Mt. Manengouba
	MM37	Arthroleptidae	Arthroleptis	perreti	2011	Negative			Cameroon	Littoral	Mt. Manengouba
	MM39	Arthroleptidae	Arthroleptis	perreti	2011	Negative			Cameroon	Littoral	Mt. Manengouba
	MM40	Arthroleptidae	Arthroleptis	perreti	2011	Negative			Cameroon	Littoral	Mt. Manengouba
	MM41	Arthroleptidae	Arthroleptis	perreti	2011	Negative			Cameroon	Littoral	Mt. Manengouba
	MM42	Arthroleptidae	Arthroleptis	perreti	2011	Negative			Cameroon	Littoral	Mt. Manengouba
	MM43	Arthroleptidae	Arthroleptis	perreti	2011	Negative			Cameroon	Littoral	Mt. Manengouba
	MM45	Arthroleptidae	Arthroleptis	perreti	2011	Negative			Cameroon	Littoral	Mt. Manengouba
	MM101	Arthroleptidae	Arthroleptis	perreti	2011	Positive	1.98997	0.0248746	Cameroon	Littoral	Mt. Manengouba
	MM25	Arthroleptidae	Arthroleptis	perreti	2011	Positive	1.34345	0.0167931	Cameroon	Littoral	Mt. Manengouba
	MM97	Arthroleptidae	Arthroleptis	perreti	2011	Positive	30.7758	0.384697	Cameroon	Littoral	Mt. Manengouba
	MM98	Arthroleptidae	Arthroleptis	perreti	2011	Positive	48.193	0.602412	Cameroon	Littoral	Mt. Manengouba
CAS 249960		Arthroleptidae	Arthroleptis	sp.	2011	Negative			Cameroon	Center	Yaounde, University of Yaounde Campus
CAS 249962		Arthroleptidae	Arthroleptis	sp.	2011	Negative			Cameroon	Center	old rd' W of Yaounde to Douala
CAS 249963		Arthroleptidae	Arthroleptis	sp.	2011	Negative			Cameroon	Center	old rd' W of Yaounde to Douala
CAS 249972		Arthroleptidae	Arthroleptis	sp.	2011	Negative			Cameroon	Center	pond on Trail near Megangme
CAS 250039		Arthroleptidae	Arthroleptis	sp.	2011	Negative			Cameroon	Northwest	Lake Nios, 06 20 9.42 N, 10 02 6.48 E
CAS 250011		Arthroleptidae	Arthroleptis	sp.	2011	Positive	41396.8	517.46	Cameroon	Northwest	06 32 55.02 N, 10 45 35.94 E
	MM87	Arthroleptidae	Arthroleptis	tuberosus	2011	Negative			Cameroon	Southwest	Mt. Manengouba, Nkack
	MM86	Arthroleptidae	Arthroleptis	tuberosus	2011	Positive	1.55962	0.0194952	Cameroon	Southwest	Mt. Manengouba, Nkack
	MM100	Arthroleptidae	Astylosternus	cf. montanus	2011	Negative			Cameroon	Littoral	Mt. Manengouba
	MM82	Arthroleptidae	Astylosternus	cf. montanus	2011	Negative			Cameroon	Southwest	Mt. Manengouba, Ebonemin
	MM85	Arthroleptidae	Astylosternus	diadematus	2011	Negative			Cameroon	Southwest	Mt. Manengouba, Nkack
	MM90	Arthroleptidae	Astylosternus	diadematus	2011	Negative			Cameroon	Southwest	Mt. Manengouba, Nkack
	MM93	Arthroleptidae	Astylosternus	diadematus	2011	Negative			Cameroon	Southwest	Mt. Manengouba, Nkack
	MM94	Arthroleptidae	Astylosternus	diadematus	2011	Negative			Cameroon	Southwest	Mt. Manengouba, Nkack
	MM105	Arthroleptidae	Astylosternus	perreti	2011	Negative			Cameroon	Southwest	Pola
	MM106	Arthroleptidae	Astylosternus	perreti	2011	Negative			Cameroon	Southwest	Nkikoh
	MM107	Arthroleptidae	Astylosternus	perreti	2011	Negative			Cameroon	Southwest	Nkikoh
	MM83	Arthroleptidae	Astylosternus	perreti	2011	Negative			Cameroon	Southwest	Mt. Manengouba, Ebonemin
	MM102	Arthroleptidae	Astylosternus	rheophilus	2011	Negative			Cameroon	Littoral	Mt. Manengouba
	MM99	Arthroleptidae	Astylosternus	rheophilus	2011	Negative			Cameroon	Littoral	Mt. Manengouba
	MM58	Arthroleptidae	Astylosternus	sp. 2	2011	Negative			Cameroon	Southwest	Mt. Manengouba, Ebonemin
	MM59	Arthroleptidae	Astylosternus	sp. 2	2011	Negative			Cameroon	Southwest	Mt. Manengouba, Ebonemin
	MM62	Arthroleptidae	Astylosternus	sp. 2	2011	Negative			Cameroon	Southwest	Mt. Manengouba, Ebonemin
	MM66	Arthroleptidae	Astylosternus	sp. 2	2011	Negative			Cameroon	Southwest	Mt. Manengouba, Ebonemin
	MM68	Arthroleptidae	Astylosternus	sp. 2	2011	Negative			Cameroon	Southwest	Mt. Manengouba, Ebonemin
	MM76	Arthroleptidae	Astylosternus	sp. 2	2011	Negative			Cameroon	Southwest	Mt. Manengouba, Ebonemin
	MM10	Arthroleptidae	Astylosternus	sp. 3	2011	Negative			Cameroon	Littoral	Manengouba village
	MM14	Arthroleptidae	Astylosternus	sp. 3	2011	Negative			Cameroon	Littoral	Manengouba village
	MM3	Arthroleptidae	Astylosternus	sp. 3	2011	Negative			Cameroon	Littoral	Manengouba village
	MM4	Arthroleptidae	Astylosternus	sp. 3	2011	Negative			Cameroon	Littoral	Manengouba village
	MM5	Arthroleptidae	Astylosternus	sp. 3	2011	Negative			Cameroon	Littoral	Manengouba village
	MM52	Arthroleptidae	Astylosternus	sp. 3	2011	Negative			Cameroon	Southwest	Mt. Manengouba, Ebonemin
	MM55	Arthroleptidae	Astylosternus	sp. 3	2011	Negative			Cameroon	Southwest	Mt. Manengouba, Ebonemin
	MM56	Arthroleptidae	Astylosternus	sp. 3	2011	Negative			Cameroon	Southwest	Mt. Manengouba, Ebonemin
	MM57	Arthroleptidae	Astylosternus	sp. 3	2011	Negative			Cameroon	Southwest	Mt. Manengouba, Ebonemin
	MM6	Arthroleptidae	Astylosternus	sp. 3	2011	Negative			Cameroon	Littoral	Manengouba village
	MM60	Arthroleptidae	Astylosternus	sp. 3	2011	Negative			Cameroon	Southwest	Mt. Manengouba, Ebonemin
	MM63	Arthroleptidae	Astylosternus	sp. 3	2011	Negative			Cameroon	Southwest	Mt. Manengouba, Ebonemin
	MM64	Arthroleptidae	Astylosternus	sp. 3	2011	Negative			Cameroon	Southwest	Mt. Manengouba, Ebonemin
	MM69	Arthroleptidae	Astylosternus	sp. 3	2011	Negative			Cameroon	Southwest	Mt. Manengouba, Ebonemin
	MM70	Arthroleptidae	Astylosternus	sp. 3	2011	Negative			Cameroon	Southwest	Mt. Manengouba, Ebonemin
	MM75	Arthroleptidae	Astylosternus	sp. 3	2011	Negative			Cameroon	Southwest	Mt. Manengouba, Ebonemin
	MM24	Arthroleptidae	Astylosternus	sp. 4	2011	Negative			Cameroon	Littoral	Mt. Manengouba
	MM77	Arthroleptidae	Astylosternus	sp. 5	2011	Negative			Cameroon	Southwest	Mt. Manengouba, Ebonemin
	MM1	Arthroleptidae	Cardioglossa	gracilis	2011	Negative			Cameroon	Littoral	Manengouba village
	MM47	Arthroleptidae	Cardioglossa	gracilis	2011	Negative			Cameroon	Littoral	Mt. Manengouba
	MM9	Arthroleptidae	Cardioglossa	gracilis	2011	Negative			Cameroon	Littoral	Manengouba village
	MM19	Arthroleptidae	Cardioglossa	gracilis	2011	Positive	35.9174	0.448968	Cameroon	Littoral	Mt. Manengouba
	MM20	Arthroleptidae	Cardioglossa	gracilis	2011	Positive	26.9554	0.336943	Cameroon	Littoral	Mt. Manengouba
	MM21	Arthroleptidae	Cardioglossa	gracilis	2011	Positive	6843.26	85.5407	Cameroon	Littoral	Mt. Manengouba
	MM22	Arthroleptidae	Cardioglossa	gracilis	2011	Positive	226.22	2.82775	Cameroon	Littoral	Mt. Manengouba
	MM48	Arthroleptidae	Cardioglossa	melanogaster	2011	Negative			Cameroon	Littoral	Mt. Manengouba
	MM49	Arthroleptidae	Cardioglossa	melanogaster	2011	Negative			Cameroon	Littoral	Mt. Manengouba
	MM50a	Arthroleptidae	Cardioglossa	melanogaster	2011	Negative			Cameroon	Littoral	Mt. Manengouba
	MM91	Arthroleptidae	Cardioglossa	melanogaster	2011	Negative			Cameroon	Southwest	Mt. Manengouba, Nkack
	MM92	Arthroleptidae	Cardioglossa	melanogaster	2011	Negative			Cameroon	Southwest	Mt. Manengouba, Nkack
	MM23	Arthroleptidae	Cardioglossa	melanogaster	2011	Positive	9.42672	0.117834	Cameroon	Littoral	Mt. Manengouba
	MM7	Arthroleptidae	Cardioglossa	melanogaster	2011	Positive	29.3336	0.36667	Cameroon	Littoral	Manengouba village
	MM31	Arthroleptidae	Leptodactylodon	erythrogaster	2011	Negative			Cameroon	Littoral	Mt. Manengouba
	MM32	Arthroleptidae	Leptodactylodon	erythrogaster	2011	Negative			Cameroon	Littoral	Mt. Manengouba
	MM38	Arthroleptidae	Leptodactylodon	erythrogaster	2011	Negative			Cameroon	Littoral	Mt. Manengouba
	MM103	Arthroleptidae	Leptodactylodon	erythrogaster	2011	Positive	16.3631	0.204539	Cameroon	Littoral	Mt. Manengouba
	MM28	Arthroleptidae	Leptodactylodon	erythrogaster	2011	Positive	15.3237	0.191546	Cameroon	Littoral	Mt. Manengouba
	MM95	Arthroleptidae	Leptodactylodon	erythrogaster	2011	Positive	2.28356	0.0285445	Cameroon	Littoral	Mt. Manengouba
	M50	Arthroleptidae	Leptodactylodon	mertensi	2011	Negative			Cameroon	Southwest	Mt. Manengouba, Ebonemin
	MM17	Arthroleptidae	Leptodactylodon	mertensi	2011	Negative			Cameroon	Littoral	Manengouba village
	MM51	Arthroleptidae	Leptodactylodon	mertensi	2011	Negative			Cameroon	Southwest	Mt. Manengouba, Ebonemin
	MM67	Arthroleptidae	Leptodactylodon	mertensi	2011	Negative			Cameroon	Southwest	Mt. Manengouba, Ebonemin
	MM71	Arthroleptidae	Leptodactylodon	mertensi	2011	Negative			Cameroon	Southwest	Mt. Manengouba, Ebonemin
	MM73	Arthroleptidae	Leptodactylodon	mertensi	2011	Negative			Cameroon	Southwest	Mt. Manengouba, Ebonemin
	MM74	Arthroleptidae	Leptodactylodon	mertensi	2011	Negative			Cameroon	Southwest	Mt. Manengouba, Ebonemin
	MM78	Arthroleptidae	Leptodactylodon	mertensi	2011	Negative			Cameroon	Southwest	Mt. Manengouba, Ebonemin
	MM79	Arthroleptidae	Leptodactylodon	mertensi	2011	Negative			Cameroon	Southwest	Mt. Manengouba, Ebonemin
	MM8	Arthroleptidae	Leptodactylodon	mertensi	2011	Negative			Cameroon	Littoral	Manengouba village
	MM12	Arthroleptidae	Leptodactylodon	mertensi	2011	Positive	3.35243	0.0419054	Cameroon	Littoral	Manengouba village
	MM61	Arthroleptidae	Leptodactylodon	mertensi	2011	Positive	11.6452	0.145565	Cameroon	Southwest	Mt. Manengouba, Ebonemin
	MM53	Arthroleptidae	Leptopelis	brevirostris	2011	Positive	711.527	8.89409	Cameroon	Southwest	Mt. Manengouba, Ebonemin
	MM108	Arthroleptidae	Leptopelis	calcaratus	2011	Negative			Cameroon	Southwest	Nkikoh
	MM11	Arthroleptidae	Leptopelis	calcaratus	2011	Negative			Cameroon	Littoral	Manengouba village
	MM13	Arthroleptidae	Leptopelis	calcaratus	2011	Negative			Cameroon	Littoral	Manengouba village
	MM46	Arthroleptidae	Leptopelis	calcaratus	2011	Negative			Cameroon	Littoral	Mt. Manengouba
	MM65	Arthroleptidae	Leptopelis	calcaratus	2011	Negative			Cameroon	Southwest	Mt. Manengouba, Ebonemin
	MM80	Arthroleptidae	Leptopelis	calcaratus	2011	Negative			Cameroon	Southwest	Mt. Manengouba, Ebonemin
	MM15	Arthroleptidae	Leptopelis	calcaratus	2011	Positive	2.24073	0.0280091	Cameroon	Littoral	Manengouba village
	MM72	Arthroleptidae	Leptopelis	calcaratus	2011	Positive	2.45189	0.0306486	Cameroon	Southwest	Mt. Manengouba, Ebonemin
	MM44	Arthroleptidae	Leptopelis	modestus	2011	Negative			Cameroon	Littoral	Mt. Manengouba
	MM84	Arthroleptidae	Leptopelis	modestus	2011	Negative			Cameroon	Southwest	Mt. Manengouba, Ebonemin
	MM88	Arthroleptidae	Leptopelis	modestus	2011	Negative			Cameroon	Southwest	Mt. Manengouba, Nkack
	MM96	Arthroleptidae	Leptopelis	modestus	2011	Positive	27.2534	0.340667	Cameroon	Littoral	Mt. Manengouba
CAS 249976		Arthroleptidae	Leptopelis	sp.	2011	Negative			Cameroon	Center	Sanaga River Bank site
CAS 249977		Arthroleptidae	Leptopelis	sp.	2011	Negative			Cameroon	Center	Sanaga River Bank site
CAS 249978		Arthroleptidae	Leptopelis	sp.	2011	Negative			Cameroon	Center	Sanaga River Bank site
CAS 249980		Arthroleptidae	Leptopelis	sp.	2011	Negative			Cameroon	Center	Sanaga River Bank site
CAS 249981		Arthroleptidae	Leptopelis	sp.	2011	Negative			Cameroon	Center	Sanaga River Bank site
CAS 249982		Arthroleptidae	Leptopelis	sp.	2011	Negative			Cameroon	Center	Sanaga River Bank site
CAS 249983		Arthroleptidae	Leptopelis	sp.	2011	Negative			Cameroon	Center	Sanaga River Bank site
CAS 249984		Arthroleptidae	Leptopelis	sp.	2011	Negative			Cameroon	Center	Sanaga River Bank site
CAS 249979		Arthroleptidae	Leptopelis	sp.	2011	Positive	10.4	0.13	Cameroon	Center	Sanaga River Bank site
CAS 249959		Bufonidae	Amietophrynus	sp.	2011	Negative			Cameroon	Center	Yaounde, University of Yaounde Campus
CAS 250030		Bufonidae	Amietophrynus	sp.	2011	Negative			Cameroon	Northwest	Lower Bafut, 06 10 9.42 N, 10 04 28.44 E
CAS 250031		Bufonidae	Amietophrynus	sp.	2011	Negative			Cameroon	Northwest	Lower Bafut, 06 10 9.42 N, 10 04 28.44 E
MCZ A-148087		Bufonidae	Amietophrynus	sp.	2011	Negative			Cameroon	Center	Yaounde, University of Yaounde Campus
MCZ A-148088		Bufonidae	Amietophrynus	sp.	2011	Negative			Cameroon	Center	Yaounde, University of Yaounde Campus
MCZ A-148089		Bufonidae	Amietophrynus	sp.	2011	Negative			Cameroon	Center	Yaounde, University of Yaounde Campus
MCZ A-148091		Bufonidae	Amietophrynus	sp.	2011	Negative			Cameroon	Center	Sena, Nkoteng subdivision, Meganme Village, Senaga River
MCZ A-148092		Bufonidae	Amietophrynus	sp.	2011	Negative			Cameroon	Center	Sena, Nkoteng subdivision, Meganme Village, Senaga River
MCZ A-148116		Bufonidae	Amietophrynus	sp.	2011	Negative			Cameroon	Northwest	Lower Bafut
MCZ A-148117		Bufonidae	Amietophrynus	sp.	2011	Negative			Cameroon	Northwest	Lower Bafut
MCZ A-148118		Bufonidae	Amietophrynus	sp.	2011	Negative			Cameroon	Northwest	Lower Bafut
MCZ A-148119		Bufonidae	Amietophrynus	sp.	2011	Negative			Cameroon	West	Lac Mont Mbapit
MCZ A-148121		Bufonidae	Amietophrynus	sp.	2011	Negative			Cameroon	Northwest	Obang
MCZ A-148122		Bufonidae	Amietophrynus	sp.	2011	Negative			Cameroon	Northwest	dilapidated estate with fish ponds
MCZ A-148123		Bufonidae	Amietophrynus	sp.	2011	Negative			Cameroon	Northwest	dilapidated estate with fish ponds
MCZ A-148124		Bufonidae	Amietophrynus	sp.	2011	Negative			Cameroon	Northwest	dilapidated estate with fish ponds
MCZ A-148126		Bufonidae	Amietophrynus	sp.	2011	Negative			Cameroon	Northwest	Bamenda, ilapidated estate with fish ponds
CAS 249990		Bufonidae	Amietophrynus	sp.	2011	Positive	4628.8	57.86	Cameroon	Center	Sanaga River fisherman's camp
CAS 250037		Bufonidae	Amietophrynus	sp.	2011	Positive	196	2.45	Cameroon	Northwest	Lake Nios, 06 20 9.42 N, 10 02 6.48 E
MCZ A-148090		Bufonidae	Amietophrynus	sp.	2011	Positive	13.76	0.172	Cameroon	Center	Yaounde, University of Yaounde Campus
MCZ A-148093		Bufonidae	Amietophrynus	sp.	2011	Positive	62.24	0.778	Cameroon	Center	Sena, Nkoteng subdivision, Meganme Village, Senaga River
MCZ A-148120		Bufonidae	Amietophrynus	sp.	2011	Positive	0.02352	0.000294	Cameroon	Northwest	Obang
MCZ A-148125		Bufonidae	Amietophrynus	sp.	2011	Positive	0.02176	0.000272	Cameroon	Northwest	dilapidated estate with fish ponds
	MM81	Bufonidae	Wolterstorffina	cf. parvipalmata	2011	Negative			Cameroon	Southwest	Mt. Manengouba, Ebonemin
CAS 249882		Hyperoliidae	Afrixalus	fulvovittatus	2011	Negative			Cameroon	Northwest	Obang
CAS 249950		Hyperoliidae	Afrixalus	fulvovittatus	2011	Negative			Cameroon	Center	Yaounde, University of Yaounde Campus
CAS 249951		Hyperoliidae	Afrixalus	fulvovittatus	2011	Negative			Cameroon	Center	Yaounde, University of Yaounde Campus
CAS 249952		Hyperoliidae	Afrixalus	fulvovittatus	2011	Negative			Cameroon	Center	Yaounde, University of Yaounde Campus
CAS 249954		Hyperoliidae	Afrixalus	fulvovittatus	2011	Negative			Cameroon	Center	Yaounde, University of Yaounde Campus
CAS 249993		Hyperoliidae	Afrixalus	fulvovittatus	2011	Negative			Cameroon	West	05 06 31.98 N, 10 36 57.12 E
CAS 249994		Hyperoliidae	Afrixalus	fulvovittatus	2011	Negative			Cameroon	West	05 06 31.98 N, 10 36 57.12 E
CAS 249999		Hyperoliidae	Afrixalus	fulvovittatus	2011	Negative			Cameroon	West	Ngindom Coc
CAS 250001		Hyperoliidae	Afrixalus	fulvovittatus	2011	Negative			Cameroon	West	Lake Mont Mbapit [Lake Nfou]
CAS 250032		Hyperoliidae	Afrixalus	fulvovittatus	2011	Negative			Cameroon	Northwest	Lower Bafut, 06 10 9.42 N, 10 04 28.44 E
CAS 250033		Hyperoliidae	Afrixalus	fulvovittatus	2011	Negative			Cameroon	Northwest	Lower Bafut, 06 10 9.42 N, 10 04 28.44 E
CAS 249953		Hyperoliidae	Afrixalus	fulvovittatus	2011	Positive	3.2	0.04	Cameroon	Center	Yaounde, University of Yaounde Campus
CAS 249955		Hyperoliidae	Afrixalus	fulvovittatus	2011	Positive	73.28	0.916	Cameroon	Center	Yaounde, University of Yaounde Campus
CAS 249956		Hyperoliidae	Afrixalus	fulvovittatus	2011	Positive	1.944	0.0243	Cameroon	Center	Yaounde, University of Yaounde Campus
CAS 249957		Hyperoliidae	Afrixalus	fulvovittatus	2011	Positive	9.52	0.119	Cameroon	Center	Yaounde, University of Yaounde Campus
CAS 249958		Hyperoliidae	Afrixalus	fulvovittatus	2011	Positive	7.64	0.0955	Cameroon	Center	Yaounde, University of Yaounde Campus
CAS 249995		Hyperoliidae	Afrixalus	fulvovittatus	2011	Positive	3.656	0.0457	Cameroon	West	05 06 31.98 N, 10 36 57.12 E
CAS 250008		Hyperoliidae	Afrixalus	fulvovittatus	2011	Positive	70.72	0.884	Cameroon	Northwest	06 32 55.02 N, 10 45 35.94 E
CAS 250009		Hyperoliidae	Afrixalus	fulvovittatus	2011	Positive	37.36	0.467	Cameroon	Northwest	06 32 55.02 N, 10 45 35.94 E
MCZ A-148085		Hyperoliidae	Afrixalus	fulvovittatus	2011	Positive	96	1.2	Cameroon	Northwest	Nkambe
MCZ A-148086		Hyperoliidae	Afrixalus	fulvovittatus	2011	Positive	156.8	1.96	Cameroon	Northwest	Nkambe
MCZ A-148023		Hyperoliidae	Afrixalus	fulvovittatus type b	2011	Negative			Cameroon	Center	Yaounde, University of Yaounde campus
MCZ A-148024		Hyperoliidae	Afrixalus	fulvovittatus type b	2011	Positive	1.864	0.0233	Cameroon	Center	Yaounde, University of Yaounde campus
MCZ A-148025		Hyperoliidae	Afrixalus	fulvovittatus type b	2011	Positive	3.144	0.0393	Cameroon	Center	Yaounde, University of Yaounde Campus
CAS 249969		Hyperoliidae	Afrixalus	nigeriensis	2011	Negative			Cameroon	Center	pond on Trail near Megangme
CAS 250038		Hyperoliidae	Afrixalus	paradorsalis	2011	Positive	4.184	0.0523	Cameroon	Northwest	Lake Nios, 06 20 9.42 N, 10 02 6.48 E
CAS 249899		Hyperoliidae	Hyperolius	cf. balfouri	2011	Negative			Cameroon	Northwest	Bamenda fish pond farm
CAS 249893		Hyperoliidae	Hyperolius	cf. balfouri	2011	Positive	5.976	0.0747	Cameroon	Northwest	Bamenda, ilapidated estate with fish ponds
CAS 249894		Hyperoliidae	Hyperolius	cf. balfouri	2011	Positive	2.176	0.0272	Cameroon	Northwest	Bamenda, ilapidated estate with fish ponds
CAS 249895		Hyperoliidae	Hyperolius	cf. balfouri	2011	Positive	91.2	1.14	Cameroon	Northwest	Bamenda, ilapidated estate with fish ponds
CAS 250003		Hyperoliidae	Hyperolius	cf. balfouri	2011	Positive	50.56	0.632	Cameroon	Northwest	06 32 55.02 N, 10 45 35.94 E
CAS 250004		Hyperoliidae	Hyperolius	cf. balfouri	2011	Positive	131.2	1.64	Cameroon	Northwest	06 32 55.02 N, 10 45 35.94 E
CAS 250005		Hyperoliidae	Hyperolius	cf. balfouri	2011	Positive	624.8	7.81	Cameroon	Northwest	06 32 55.02 N, 10 45 35.94 E
CAS 250006		Hyperoliidae	Hyperolius	cf. balfouri	2011	Positive	16.08	0.201	Cameroon	Northwest	06 32 55.02 N, 10 45 35.94 E
CAS 250027		Hyperoliidae	Hyperolius	cf. balfouri	2011	Positive	72.88	0.911	Cameroon	Northwest	05 51 20.64 N, 10 09 30.72 E
CAS 250028		Hyperoliidae	Hyperolius	cf. balfouri	2011	Positive	21.36	0.267	Cameroon	Northwest	05 51 20.64 N, 10 09 30.72 E
MCZ A-148081		Hyperoliidae	Hyperolius	cf. balfouri	2011	Positive	1111.2	13.89	Cameroon	Northwest	Nkambe
MCZ A-148082		Hyperoliidae	Hyperolius	cf. balfouri	2011	Positive	47.92	0.599	Cameroon	Northwest	Nkambe
MCZ A-148083		Hyperoliidae	Hyperolius	cf. balfouri	2011	Positive	343.2	4.29	Cameroon	Northwest	Nkambe
MCZ A-148084		Hyperoliidae	Hyperolius	cf. balfouri	2011	Positive	84	1.05	Cameroon	Northwest	Nkambe
	BJE 3200	Hyperoliidae	Hyperolius	cf. nasutus	2011	Positive	5.904	0.0738	Cameroon	Northwest	Agricultural fish ponds next to boulder fields
	BJE 3201	Hyperoliidae	Hyperolius	cf. nasutus	2011	Positive	50.32	0.629	Cameroon	Northwest	Agricultural fish ponds next to boulder fields
CAS 249967		Hyperoliidae	Hyperolius	ocellatus	2011	Negative			Cameroon	Center	pond on Trail near Megangme
CAS 249968		Hyperoliidae	Hyperolius	ocellatus	2011	Negative			Cameroon	Center	pond on Trail near Megangme
CAS 249970		Hyperoliidae	Hyperolius	ocellatus purpurescens	2011	Negative			Cameroon	Center	pond on Trail near Megangme
CAS 249971		Hyperoliidae	Hyperolius	ocellatus purpurescens	2011	Negative			Cameroon	Center	pond on Trail near Megangme
CAS 249898		Hyperoliidae	Hyperolius	riggenbachi	2011	Negative			Cameroon	Northwest	Bamenda fish pond farm
CAS 249903		Hyperoliidae	Hyperolius	riggenbachi	2011	Negative			Cameroon	Northwest	Bamenda fish pond farm
CAS 249904		Hyperoliidae	Hyperolius	riggenbachi	2011	Negative			Cameroon	Northwest	Bamenda fish pond farm
CAS 250016		Hyperoliidae	Hyperolius	riggenbachi	2011	Negative			Cameroon	Northwest	05 51 20.64 N, 10 09 30.72 E
CAS 250017		Hyperoliidae	Hyperolius	riggenbachi	2011	Negative			Cameroon	Northwest	05 51 20.64 N, 10 09 30.72 E
CAS 250019		Hyperoliidae	Hyperolius	riggenbachi	2011	Negative			Cameroon	Northwest	05 51 20.64 N, 10 09 30.72 E
CAS 250020		Hyperoliidae	Hyperolius	riggenbachi	2011	Negative			Cameroon	Northwest	05 51 20.64 N, 10 09 30.72 E
CAS 249891		Hyperoliidae	Hyperolius	riggenbachi	2011	Positive	10.88	0.136	Cameroon	Northwest	Bamenda, ilapidated estate with fish ponds
CAS 249892		Hyperoliidae	Hyperolius	riggenbachi	2011	Positive	660.8	8.26	Cameroon	Northwest	Bamenda, ilapidated estate with fish ponds
CAS 249896		Hyperoliidae	Hyperolius	riggenbachi	2011	Positive	26.16	0.327	Cameroon	Northwest	Bamenda fish pond farm
CAS 249897		Hyperoliidae	Hyperolius	riggenbachi	2011	Positive	52.64	0.658	Cameroon	Northwest	Bamenda fish pond farm
CAS 250002		Hyperoliidae	Hyperolius	riggenbachi	2011	Positive	1112.8	13.91	Cameroon	Northwest	06 32 55.02 N, 10 45 35.94 E
CAS 250013		Hyperoliidae	Hyperolius	riggenbachi	2011	Positive	1418.4	17.73	Cameroon	Northwest	05 51 20.64 N, 10 09 30.72 E
CAS 250014		Hyperoliidae	Hyperolius	riggenbachi	2011	Positive	51.92	0.649	Cameroon	Northwest	05 51 20.64 N, 10 09 30.72 E
CAS 250015		Hyperoliidae	Hyperolius	riggenbachi	2011	Positive	142.4	1.78	Cameroon	Northwest	05 51 20.64 N, 10 09 30.72 E
CAS 250018		Hyperoliidae	Hyperolius	riggenbachi	2011	Positive	413.6	5.17	Cameroon	Northwest	05 51 20.64 N, 10 09 30.72 E
CAS 250021		Hyperoliidae	Hyperolius	riggenbachi	2011	Positive	60.16	0.752	Cameroon	Northwest	05 51 20.64 N, 10 09 30.72 E
CAS 250022		Hyperoliidae	Hyperolius	riggenbachi	2011	Positive	22.96	0.287	Cameroon	Northwest	05 51 20.64 N, 10 09 30.72 E
CAS 250023		Hyperoliidae	Hyperolius	riggenbachi	2011	Positive	3.272	0.0409	Cameroon	Northwest	05 51 20.64 N, 10 09 30.72 E
CAS 250024		Hyperoliidae	Hyperolius	riggenbachi	2011	Positive	3.208	0.0401	Cameroon	Northwest	05 51 20.64 N, 10 09 30.72 E
CAS 250025		Hyperoliidae	Hyperolius	riggenbachi	2011	Positive	8.72	0.109	Cameroon	Northwest	05 51 20.64 N, 10 09 30.72 E
CAS 250026		Hyperoliidae	Hyperolius	riggenbachi	2011	Positive	375.2	4.69	Cameroon	Northwest	05 51 20.64 N, 10 09 30.72 E
CAS 250029		Hyperoliidae	Hyperolius	riggenbachi	2011	Positive	367.2	4.59	Cameroon	Northwest	05 54 32.46 N, 10 09 40.56 E
MCZ A-148100		Hyperoliidae	Hyperolius	riggenbachi	2011	Positive	823.2	10.29	Cameroon	Northwest	Bamenda
MCZ A-148101		Hyperoliidae	Hyperolius	riggenbachi	2011	Positive	80.8	1.01	Cameroon	Northwest	Bamenda
MCZ A-148102		Hyperoliidae	Hyperolius	riggenbachi	2011	Positive	178.4	2.23	Cameroon	Northwest	Bamenda
MCZ A-148103		Hyperoliidae	Hyperolius	riggenbachi	2011	Positive	8.32	0.104	Cameroon	Northwest	Bamenda
MCZ A-148104		Hyperoliidae	Hyperolius	riggenbachi	2011	Positive	17.36	0.217	Cameroon	Northwest	Bamenda
MCZ A-148105		Hyperoliidae	Hyperolius	riggenbachi	2011	Positive	795.2	9.94	Cameroon	Northwest	Bamenda
CAS 249998		Hyperoliidae	Hyperolius	sp.	2011	Negative			Cameroon	West	Balaoungao
CAS 250000		Hyperoliidae	Hyperolius	sp.	2011	Negative			Cameroon	West	Lake Mont Mbapit [Lake Nfou]
CAS 250034		Hyperoliidae	Hyperolius	sp.	2011	Negative			Cameroon	Northwest	Lower Bafut, 06 10 9.42 N, 10 04 28.44 E
CAS 249988		Hyperoliidae	Hyperolius	tuberculatus	2011	Negative			Cameroon	Center	Sanaga River Bank site
CAS 249989		Hyperoliidae	Hyperolius	tuberculatus	2011	Negative			Cameroon	Center	Sanaga River Bank site
	MM36	Hyperoliidae	Hyperolius	viridistriatus	2011	Negative			Cameroon	Littoral	Mt. Manengouba
	MM54	Hyperoliidae	Hyperolius	viridistriatus	2011	Positive	852.76	10.6595	Cameroon	Southwest	Mt. Manengouba, Ebonemin
CAS 250010		Hyperoliidae	Kassina	cf. maculosa	2011	Positive	6.768	0.0846	Cameroon	Northwest	06 32 55.02 N, 10 45 35.94 E
	MM89	Phrynobatrachidae	Phrynobatrachus	cricogaster	2011	Positive	56.703	0.708788	Cameroon	Southwest	Mt. Manengouba, Nkack
	MM16	Phrynobatrachidae	Phrynobatrachus	sp.	2011	Negative			Cameroon	Littoral	Manengouba village
	MM18	Phrynobatrachidae	Phrynobatrachus	sp.	2011	Positive	5.53374	0.0691718	Cameroon	Littoral	Manengouba village
	MM35	Phrynobatrachidae	Phrynobatrachus	steindachneri	2011	Negative			Cameroon	Littoral	Mt. Manengouba
CAS 249965		Pipidae	Hymenochirus	sp.	2011	Negative			Cameroon	Center	pond on Trail near Megangme
CAS 249961		Pipidae	Xenopus	cf. fraseri	2011	Negative			Cameroon	Center	old rd' W of Yaounde to Douala
MCZ A-148029		Pipidae	Xenopus	cf. fraseri	2011	Negative			Cameroon	Center	Old Douala Road, ~20 minutes drive east of Yaounde
MCZ A-148034		Pipidae	Xenopus	cf. fraseri	2011	Negative			Cameroon	Center	Old Douala Road, ~20 minutes drive east of Yaounde
MCZ A-148036		Pipidae	Xenopus	cf. ruwenzoriensis	2011	Negative			Cameroon	Center	Sena, Nkoteng subdivision, Meganme village
MCZ A-148038		Pipidae	Xenopus	cf. ruwenzoriensis	2011	Negative			Cameroon	Center	Sena, Nkoteng subdivision, Meganme village
MCZ A-148061		Pipidae	Xenopus	cf. ruwenzoriensis	2011	Negative			Cameroon	West	Balaoungao
MCZ A-148065		Pipidae	Xenopus	cf. ruwenzoriensis	2011	Negative			Cameroon	West	Nuon Division, Ngindom Coc
MCZ A-148108		Pipidae	Xenopus	cf. sudanensis	2011	Negative			Cameroon	Northwest	Lower Bafut
CAS 249964		Pipidae	Xenopus	fraseri	2011	Negative			Cameroon	Center	pond on Trail near Megangme
CAS 249996		Pipidae	Xenopus	fraseri	2011	Negative			Cameroon	West	Balaoungao
CAS 249997		Pipidae	Xenopus	fraseri	2011	Negative			Cameroon	West	Balaoungao
MCZ A-148027		Pipidae	Xenopus	fraseri	2011	Negative			Cameroon	Center	Old Douala Road, ~20 minutes drive east of Yaounde
MCZ A-148028		Pipidae	Xenopus	fraseri	2011	Negative			Cameroon	Center	Old Douala Road, ~20 minutes drive east of Yaounde
MCZ A-148030		Pipidae	Xenopus	fraseri	2011	Negative			Cameroon	Center	Old Douala Road, ~20 minutes drive east of Yaounde
MCZ A-148031		Pipidae	Xenopus	fraseri	2011	Negative			Cameroon	Center	Old Douala Road, ~20 minutes drive east of Yaounde
MCZ A-148032		Pipidae	Xenopus	fraseri	2011	Negative			Cameroon	Center	Old Douala Road, ~20 minutes drive east of Yaounde
MCZ A-148033		Pipidae	Xenopus	fraseri	2011	Negative			Cameroon	Center	Old Douala Road, ~20 minutes drive east of Yaounde
MCZ A-148035		Pipidae	Xenopus	fraseri	2011	Negative			Cameroon	Center	Sena, Nkoteng subdivision, Meganme village
MCZ A-148037		Pipidae	Xenopus	fraseri	2011	Negative			Cameroon	Center	Sena, Nkoteng subdivision, Meganme village
MCZ A-148039		Pipidae	Xenopus	fraseri	2011	Negative			Cameroon	Center	Sena, Nkoteng subdivision, Meganme village
MCZ A-148059		Pipidae	Xenopus	fraseri	2011	Negative			Cameroon	West	Balaoungao
MCZ A-148060		Pipidae	Xenopus	fraseri	2011	Negative			Cameroon	West	Balaoungao
MCZ A-148062		Pipidae	Xenopus	fraseri	2011	Negative			Cameroon	West	Balaoungao
MCZ A-148063		Pipidae	Xenopus	fraseri	2011	Negative			Cameroon	West	Balaoungao
MCZ A-148064		Pipidae	Xenopus	fraseri	2011	Negative			Cameroon	West	Balaoungao
MCZ A-148066		Pipidae	Xenopus	fraseri	2011	Negative			Cameroon	West	Nuon Division, Ngindom Coc
MCZ A-148096		Pipidae	Xenopus	fraseri	2011	Negative			Cameroon	Northwest	East (~5 km) of Nkambe
MCZ A-148097		Pipidae	Xenopus	fraseri	2011	Negative			Cameroon	Northwest	East (~5 km) of Nkambe
MCZ A-148128		Pipidae	Xenopus	fraseri	2011	Negative			Cameroon	Northwest	Bamenda
MCZ A-148129		Pipidae	Xenopus	fraseri	2011	Negative			Cameroon	Northwest	Bamenda
MCZ A-148130		Pipidae	Xenopus	fraseri	2011	Negative			Cameroon	Northwest	Bamenda
MCZ A-148131		Pipidae	Xenopus	fraseri	2011	Negative			Cameroon	Northwest	Bamenda
	BJE 3073	Pipidae	Xenopus	fraseri	2011	Negative			Cameroon	Center	Pond on Trail near Megangme
MCZ A-148095		Pipidae	Xenopus	fraseri	2011	Positive	5.92	0.074	Cameroon	Northwest	East (~5 km) of Nkambe
MCZ A-148098		Pipidae	Xenopus	fraseri	2011	Positive	1.888	0.0236	Cameroon	Northwest	East (~5 km) of Nkambe
MCZ A-148099		Pipidae	Xenopus	fraseri	2011	Positive	52.48	0.656	Cameroon	Northwest	East (~5 km) of Nkambe
MCZ A-148076		Pipidae	Xenopus	longipes	2011	Negative			Cameroon	Northwest	Lake Oku
MCZ A-148077		Pipidae	Xenopus	longipes	2011	Negative			Cameroon	Northwest	Lake Oku
MCZ A-148078		Pipidae	Xenopus	longipes	2011	Negative			Cameroon	Northwest	Lake Oku
MCZ A-148071		Pipidae	Xenopus	longipes	2011	Positive	4.448	0.0556	Cameroon	Northwest	Lake Oku
MCZ A-148072		Pipidae	Xenopus	longipes	2011	Positive	20.16	0.252	Cameroon	Northwest	Lake Oku
MCZ A-148073		Pipidae	Xenopus	longipes	2011	Positive	37.36	0.467	Cameroon	Northwest	Lake Oku
MCZ A-148074		Pipidae	Xenopus	longipes	2011	Positive	4.56	0.057	Cameroon	Northwest	Lake Oku
MCZ A-148075		Pipidae	Xenopus	longipes	2011	Positive	6.168	0.0771	Cameroon	Northwest	Lake Oku
MCZ A-148079		Pipidae	Xenopus	longipes	2011	Positive	53.28	0.666	Cameroon	Northwest	Lake Oku
MCZ A-148080		Pipidae	Xenopus	longipes	2011	Positive	36.96	0.462	Cameroon	Northwest	Lake Oku
MCZ A-148106		Pipidae	Xenopus	sp.	2011	Negative			Cameroon	Northwest	Lower Bafut
MCZ A-148107		Pipidae	Xenopus	sp.	2011	Negative			Cameroon	Northwest	Lower Bafut
MCZ A-148109		Pipidae	Xenopus	sp.	2011	Negative			Cameroon	Northwest	Lower Bafut
MCZ A-148094		Pipidae	Xenopus	sp.	2011	Positive	29.2	0.365	Cameroon	Northwest	East (~5 km) of Nkambe
MCZ A-148127		Pipidae	Xenopus	sp.	2011	Positive	0.4032	0.00504	Cameroon	Northwest	Bamenda
	MM2	Ptychadenidae	Ptychadena	cf. perreti	2011	Negative			Cameroon	Littoral	Manengouba village
CAS 249900		Ptychadenidae	Ptychadena	sp.	2011	Negative			Cameroon	Northwest	Bamenda fish pond farm
CAS 249901		Ptychadenidae	Ptychadena	sp.	2011	Negative			Cameroon	Northwest	Bamenda fish pond farm
CAS 249902		Ptychadenidae	Ptychadena	sp.	2011	Negative			Cameroon	Northwest	Bamenda fish pond farm
CAS 249991		Ptychadenidae	Ptychadena	sp.	2011	Negative			Cameroon	Center	Sanaga River trail behind fisherman's camp
CAS 249992		Ptychadenidae	Ptychadena	sp.	2011	Negative			Cameroon	Center	Sanaga River trail behind fisherman's camp
CAS 250035		Ptychadenidae	Ptychadena	sp.	2011	Negative			Cameroon	Northwest	Lower Bafut, 06 10 9.42 N, 10 04 28.44 E
CAS 250036		Ptychadenidae	Ptychadena	sp.	2011	Negative			Cameroon	Northwest	Lower Bafut, 06 10 9.42 N, 10 04 28.44 E
MCZ A-148026		Ptychadenidae	Ptychadena	sp.	2011	Negative			Cameroon	Center	Yaounde, University of Yaounde Campus
MCZ A-148052		Ptychadenidae	Ptychadena	sp.	2011	Negative			Cameroon	Center	Sena, Nkoteng subdivision, Meganme village
MCZ A-148058		Ptychadenidae	Ptychadena	sp.	2011	Negative			Cameroon	Center	Sena, Nkoteng subdivision, Meganme village, Sanaga River
MCZ A-148110		Ptychadenidae	Ptychadena	sp.	2011	Negative			Cameroon	Northwest	Lower Bafut
MCZ A-148111		Ptychadenidae	Ptychadena	sp.	2011	Negative			Cameroon	Northwest	Lower Bafut
MCZ A-148112		Ptychadenidae	Ptychadena	sp.	2011	Negative			Cameroon	Northwest	Lower Bafut
MCZ A-148113		Ptychadenidae	Ptychadena	sp.	2011	Negative			Cameroon	Northwest	Lower Bafut
MCZ A-148114		Ptychadenidae	Ptychadena	sp.	2011	Negative			Cameroon	Northwest	Lower Bafut
CAS 249966		Ptychadenidae	Ptychadena	sp.	2011	Positive	192.8	2.41	Cameroon	Center	pond on Trail near Megangme
MCZ A-148051		Ptychadenidae	Ptychadena	sp.	2011	Positive	3.432	0.0429	Cameroon	Center	Sena, Nkoteng subdivision, Meganme village
MCZ A-148055		Ptychadenidae	Ptychadena	sp.	2011	Positive	0.05776	0.000722	Cameroon	Center	Sena, Nkoteng subdivision, Meganme village
MCZ A-148067		Ptychadenidae	Ptychadena	sp.	2011	Positive	14	0.175	Cameroon	West	Lac Mont Mbapit
CAS 249985		Ranidae	Hylarana	sp.	2011	Negative			Cameroon	Center	Sanaga River Bank site
CAS 249986		Ranidae	Hylarana	sp.	2011	Negative			Cameroon	Center	Sanaga River Bank site
MCZ A-148057		Ranidae	Hylarana	sp.	2011	Negative			Cameroon	Center	Sena, Nkoteng subdivision, Meganme village, Sanaga River bank
CAS 249987		Ranidae	Hylarana	sp.	2011	Positive	0.1568	0.00196	Cameroon	Center	Sanaga River Bank site
MCZ A-148056		Ranidae	Hylarana	sp.	2011	Positive	0.0216	0.00027	Cameroon	Center	Sena, Nkoteng subdivision, Meganme village, Sanaga River bank
CAS 249973		Rhacophoridae	Chiromantis	rufescens	2011	Negative			Cameroon	Center	pond on Trail near Megangme
CAS 249974		Rhacophoridae	Chiromantis	rufescens	2011	Negative			Cameroon	Center	pond on Trail near Megangme
CAS 249975		Rhacophoridae	Chiromantis	rufescens	2011	Negative			Cameroon	Center	pond on Trail near Megangme
MCZ A-148054		Rhacophoridae	Chiromantis	rufescens	2011	Negative			Cameroon	Center	Nkoteng subdivision, Meganme village
MCZ A-148053		Rhacophoridae	Chiromantis	rufescens	2011	Positive	7.008	0.0876	Cameroon	Center	Sena, Nkoteng subdivision, Meganme village
CAS 253360		Arthroleptidae	Arthroleptis	poecilonotus	2013	Negative			Cameroon	East	Mebam, community forest slow stream site 1
CAS 253867		Arthroleptidae	Arthroleptis	poecilonotus	2013	Negative			Cameroon	Littoral	Manjo Area, Manten, highway roadside ditches
n/a	DCB 472	Arthroleptidae	Arthroleptis	poecilonotus	2013	Negative			Cameroon	South	Metomassala, MINFOF Headquarters
CAS 253290		Arthroleptidae	Arthroleptis	poecilonotus	2013	Positive	0.912	0.0114	Cameroon	East	Zoulabot II, Path through community forest
CAS 253291		Arthroleptidae	Arthroleptis	poecilonotus	2013	Positive	3.448	0.0431	Cameroon	East	Zoulabot II, Path through community forest
CAS 253292		Arthroleptidae	Arthroleptis	poecilonotus	2013	Positive	8.72	0.109	Cameroon	East	Zoulabot II, Path through community forest
CAS 253293		Arthroleptidae	Arthroleptis	poecilonotus	2013	Positive	18.32	0.229	Cameroon	East	Zoulabot II, Path through community forest
CAS 253294		Arthroleptidae	Arthroleptis	poecilonotus	2013	Positive	566.4	7.08	Cameroon	East	Zoulabot II, Path through community forest
CAS 253295		Arthroleptidae	Arthroleptis	poecilonotus	2013	Positive	38	0.475	Cameroon	East	Zoulabot II, Path through community forest
CAS 253296		Arthroleptidae	Arthroleptis	poecilonotus	2013	Positive	2371.2	29.64	Cameroon	East	Zoulabot II, Path through community forest
CAS 253297		Arthroleptidae	Arthroleptis	poecilonotus	2013	Positive	2.84	0.0355	Cameroon	East	Zoulabot II, Path through community forest
CAS 253298		Arthroleptidae	Arthroleptis	poecilonotus	2013	Positive	108.8	1.36	Cameroon	East	Zoulabot II, Path through community forest
CAS 253299		Arthroleptidae	Arthroleptis	poecilonotus	2013	Positive	54.32	0.679	Cameroon	East	Zoulabot II, Path through community forest
CAS 253300		Arthroleptidae	Arthroleptis	poecilonotus	2013	Positive	3.008	0.0376	Cameroon	East	Zoulabot II, Path through community forest
CAS 253301		Arthroleptidae	Arthroleptis	poecilonotus	2013	Positive	24.16	0.302	Cameroon	East	Zoulabot II, Path through community forest
CAS 253319		Arthroleptidae	Arthroleptis	poecilonotus	2013	Positive	88	1.1	Cameroon	East	Zoulabot II, houses adjacent to community forest
CAS 253320		Arthroleptidae	Arthroleptis	poecilonotus	2013	Positive	3.456	0.0432	Cameroon	East	Ngoyla, GVFI project house
CAS 253321		Arthroleptidae	Arthroleptis	poecilonotus	2013	Positive	158.4	1.98	Cameroon	East	Ngoyla, GVFI project house
CAS 253487		Arthroleptidae	Arthroleptis	poecilonotus	2013	Positive	458.4	5.73	Cameroon	South	Sangmelima, Hotel L'afamba grounds
CAS 253344		Arthroleptidae	Arthroleptis	sp.	2013	Negative			Cameroon	East	Doumzok, community forest path to swampy area site 3
CAS 253381		Arthroleptidae	Arthroleptis	sp.	2013	Negative			Cameroon	East	Ngoyla, community forest river banks
CAS 253382		Arthroleptidae	Arthroleptis	sp.	2013	Negative			Cameroon	East	Ngoyla, community forest river banks
CAS 253383		Arthroleptidae	Arthroleptis	sp.	2013	Negative			Cameroon	East	Ngoyla, community forest river banks
CAS 253520		Arthroleptidae	Arthroleptis	sp.	2013	Negative			Cameroon	South	Mekas, Dja Reserve, Forest stream near camp
CAS 253521		Arthroleptidae	Arthroleptis	sp.	2013	Negative			Cameroon	South	Mekas, Dja Reserve, Forest stream near camp
CAS 253555		Arthroleptidae	Arthroleptis	sp.	2013	Negative			Cameroon	South	Mekas, Dja Reserve, campsite
CAS 254029		Arthroleptidae	Arthroleptis	sp.	2013	Negative			Cameroon	Littoral	Manjo Area, Manten, marsh and slow stream in banana plantation
CAS 254031		Arthroleptidae	Arthroleptis	sp.	2013	Negative			Cameroon	Littoral	Manjo Area, Manten, marsh and slow stream in banana plantation
CAS 254032		Arthroleptidae	Arthroleptis	sp.	2013	Negative			Cameroon	Littoral	Manjo Area, Manten, marsh and slow stream in banana plantation
CAS 254033		Arthroleptidae	Arthroleptis	sp.	2013	Negative			Cameroon	Littoral	Manjo Area, Manten, marsh and slow stream in banana plantation
CAS 254030		Arthroleptidae	Arthroleptis	sp.	2013	Positive	0.6088	0.00761	Cameroon	Littoral	Manjo Area, Manten, marsh and slow stream in banana plantation
CAS 253334		Arthroleptidae	Arthroleptis	sylvaticus	2013	Negative			Cameroon	East	Doumzok, community forest pools
CAS 253373		Arthroleptidae	Arthroleptis	sylvaticus	2013	Negative			Cameroon	East	Mebam, community forest slow stream site 1
CAS 253526		Arthroleptidae	Arthroleptis	sylvaticus	2013	Negative			Cameroon	South	Mekas, Dja Reserve, path through disturbed secondary forest
CAS 253552		Arthroleptidae	Arthroleptis	sylvaticus	2013	Negative			Cameroon	South	Mekas, Dja Reserve, campsite
CAS 253565		Arthroleptidae	Arthroleptis	sylvaticus	2013	Negative			Cameroon	South	Mekas, Dja Reserve, slow stream deep in secondary forest
CAS 253566		Arthroleptidae	Arthroleptis	sylvaticus	2013	Negative			Cameroon	South	Mekas, Dja Reserve, slow stream deep in secondary forest
CAS 253602		Arthroleptidae	Arthroleptis	sylvaticus	2013	Negative			Cameroon	South	Mekas, Dja Reserve, Forest stream near camp
n/a	DCB 337	Arthroleptidae	Arthroleptis	sylvaticus	2013	Negative			Cameroon	East	Mebam, community forest slow stream site 1
CAS 253340		Arthroleptidae	Arthroleptis	taeniatus	2013	Negative			Cameroon	East	Doumzok, community forest swampy area
CAS 253371		Arthroleptidae	Astylosternus	batesi	2013	Negative			Cameroon	East	Mebam, community forest slow stream site 1
CAS 253314		Arthroleptidae	Astylosternus	batesi	2013	Positive	33.12	0.414	Cameroon	East	Zoulabot II, community forest site 2
CAS 254089		Arthroleptidae	Astylosternus	cf. fallax	2013	Negative			Cameroon	Southwest	Ekenzu, Large stream
CAS 254114		Arthroleptidae	Astylosternus	cf. fallax	2013	Negative			Cameroon	Southwest	Edib Village, Large stream
CAS 254115		Arthroleptidae	Astylosternus	cf. fallax	2013	Negative			Cameroon	Southwest	Edib Village, Large stream
CAS 254118		Arthroleptidae	Astylosternus	cf. fallax	2013	Negative			Cameroon	Southwest	Edib Village, Large stream
CAS 254116		Arthroleptidae	Astylosternus	cf. fallax	2013	Positive	0.01672	0.000209	Cameroon	Southwest	Edib Village, Large stream
CAS 254117		Arthroleptidae	Astylosternus	cf. fallax	2013	Positive	12.56	0.157	Cameroon	Southwest	Edib Village, Large stream
CAS 254104		Arthroleptidae	Astylosternus	cf. montanus	2013	Negative			Cameroon	Southwest	Edib Village, watering hole and small stream
CAS 253832		Arthroleptidae	Astylosternus	cf. montanus	2013	Positive	8.8	0.11	Cameroon	Littoral	Manengouba II, large stream
CAS 254102		Arthroleptidae	Astylosternus	cf. montanus	2013	Positive	0.54	0.00675	Cameroon	Southwest	Edib Village, watering hole and small stream
CAS 254103		Arthroleptidae	Astylosternus	cf. montanus	2013	Positive	0.0356	0.000445	Cameroon	Southwest	Edib Village, watering hole and small stream
CAS 254105		Arthroleptidae	Astylosternus	cf. montanus	2013	Positive	1.88	0.0235	Cameroon	Southwest	Edib Village, watering hole and small stream
CAS 254106		Arthroleptidae	Astylosternus	cf. montanus	2013	Positive	98.4	1.23	Cameroon	Southwest	Edib Village, watering hole and small stream
CAS 253827		Arthroleptidae	Astylosternus	cf. perreti	2013	Negative			Cameroon	Littoral	Manengouba II, large stream
CAS 253830		Arthroleptidae	Astylosternus	cf. perreti	2013	Negative			Cameroon	Littoral	Manengouba II, large stream
CAS 253831		Arthroleptidae	Astylosternus	cf. perreti	2013	Negative			Cameroon	Littoral	Manengouba II, large stream
CAS 253835		Arthroleptidae	Astylosternus	cf. perreti	2013	Negative			Cameroon	Littoral	Manengouba II, large stream
CAS 254119		Arthroleptidae	Astylosternus	cf. perreti	2013	Negative			Cameroon	Southwest	Edib Village, Large stream
CAS 253822		Arthroleptidae	Astylosternus	cf. perreti	2013	Positive	615.2	7.69	Cameroon	Littoral	Manengouba II, large stream
CAS 253823		Arthroleptidae	Astylosternus	cf. perreti	2013	Positive	19.2	0.24	Cameroon	Littoral	Manengouba II, large stream
CAS 253824		Arthroleptidae	Astylosternus	cf. perreti	2013	Positive	14.32	0.179	Cameroon	Littoral	Manengouba II, large stream
CAS 253825		Arthroleptidae	Astylosternus	cf. perreti	2013	Positive	544	6.8	Cameroon	Littoral	Manengouba II, large stream
CAS 253826		Arthroleptidae	Astylosternus	cf. perreti	2013	Positive	9.12	0.114	Cameroon	Littoral	Manengouba II, large stream
CAS 253828		Arthroleptidae	Astylosternus	cf. perreti	2013	Positive	3.648	0.0456	Cameroon	Littoral	Manengouba II, large stream
CAS 253829		Arthroleptidae	Astylosternus	cf. perreti	2013	Positive	2.312	0.0289	Cameroon	Littoral	Manengouba II, large stream
CAS 253833		Arthroleptidae	Astylosternus	cf. perreti	2013	Positive	5.584	0.0698	Cameroon	Littoral	Manengouba II, large stream
CAS 254120		Arthroleptidae	Astylosternus	cf. perreti	2013	Positive	0.01712	0.000214	Cameroon	Southwest	Edib Village, Large stream
CAS 254122		Arthroleptidae	Astylosternus	diadematus	2013	Negative			Cameroon	Southwest	Edib Village, Large stream
CAS 254123		Arthroleptidae	Astylosternus	diadematus	2013	Negative			Cameroon	Southwest	Edib Village, Large stream
CAS 254124		Arthroleptidae	Astylosternus	diadematus	2013	Negative			Cameroon	Southwest	Edib Village, Large stream
CAS 254125		Arthroleptidae	Astylosternus	diadematus	2013	Negative			Cameroon	Southwest	Edib Village, Large stream
CAS 254126		Arthroleptidae	Astylosternus	diadematus	2013	Negative			Cameroon	Southwest	Edib Village, Large stream
CAS 254121		Arthroleptidae	Astylosternus	diadematus	2013	Positive	27.68	0.346	Cameroon	Southwest	Edib Village, Large stream
CAS 253834		Arthroleptidae	Astylosternus	sp.	2013	Negative			Cameroon	Littoral	Manengouba II, large stream
CAS 255430		Arthroleptidae	Astylosternus	sp.	2013	Positive	51.76	0.647	Cameroon	West	Bamboutos
CAS 254064		Arthroleptidae	Cardioglossa	elegans	2013	Positive	11.2	0.14	Cameroon	Littoral	Manjo Area, Manten, large stream adjacent to banana plantation
CAS 254065		Arthroleptidae	Cardioglossa	elegans	2013	Positive	38.24	0.478	Cameroon	Littoral	Manjo Area, Manten, large stream adjacent to banana plantation
CAS 253567		Arthroleptidae	Cardioglossa	gracilis	2013	Negative			Cameroon	South	Mekas, Dja Reserve, slow stream deep in secondary forest
CAS 253597		Arthroleptidae	Cardioglossa	gracilis	2013	Negative			Cameroon	South	Mekas, Dja Reserve, Forest stream near camp
CAS 254192		Arthroleptidae	Cardioglossa	gracilis	2013	Negative			Cameroon	West	Bangoua, medium-sized stream adjacent to camp
CAS 254193		Arthroleptidae	Cardioglossa	gracilis	2013	Negative			Cameroon	West	Bangoua, medium-sized stream adjacent to camp
CAS 253840		Arthroleptidae	Cardioglossa	gracilis	2013	Positive	22.24	0.278	Cameroon	Littoral	Manengouba II, large stream
CAS 254191		Arthroleptidae	Cardioglossa	gracilis	2013	Positive	3.968	0.0496	Cameroon	West	Bangoua, medium-sized stream adjacent to camp
CAS 254080		Arthroleptidae	Cardioglossa	leucomystax	2013	Negative			Cameroon	Littoral	Manjo Area, Manten, second marsh and slow stream in banana plantation
CAS 253933		Arthroleptidae	Leptodactylodon	ovatus orientalis	2013	Negative			Cameroon	Littoral	Manjo Area, Manten, marsh and slow stream in banana plantation
CAS 253384		Arthroleptidae	Leptopelis	aubryi	2013	Negative			Cameroon	East	Ngoyla, community forest river banks
CAS 253385		Arthroleptidae	Leptopelis	aubryi	2013	Negative			Cameroon	East	Ngoyla, community forest river banks
CAS 253749		Arthroleptidae	Leptopelis	aubryi	2013	Negative			Cameroon	Southwest	Small Koto, village area
CAS 253750		Arthroleptidae	Leptopelis	aubryi	2013	Negative			Cameroon	Southwest	Small Koto, village area
CAS 253751		Arthroleptidae	Leptopelis	aubryi	2013	Negative			Cameroon	Southwest	Small Koto, village area
CAS 253752		Arthroleptidae	Leptopelis	aubryi	2013	Negative			Cameroon	Southwest	Small Koto, village area
CAS 253753		Arthroleptidae	Leptopelis	aubryi	2013	Negative			Cameroon	Southwest	Small Koto, village area
CAS 253754		Arthroleptidae	Leptopelis	aubryi	2013	Negative			Cameroon	Southwest	Small Koto, village area
CAS 253755		Arthroleptidae	Leptopelis	aubryi	2013	Negative			Cameroon	Southwest	Small Koto, village area
CAS 253757		Arthroleptidae	Leptopelis	aubryi	2013	Negative			Cameroon	Southwest	Small Koto, village area
CAS 253758		Arthroleptidae	Leptopelis	aubryi	2013	Negative			Cameroon	Southwest	Small Koto, village area
CAS 253766		Arthroleptidae	Leptopelis	aubryi	2013	Negative			Cameroon	Southwest	Small Koto, flooded bamboo grove and small pond
CAS 253767		Arthroleptidae	Leptopelis	aubryi	2013	Negative			Cameroon	Southwest	Small Koto, flooded bamboo grove and small pond
CAS 253768		Arthroleptidae	Leptopelis	aubryi	2013	Negative			Cameroon	Southwest	Small Koto, flooded bamboo grove and small pond
CAS 253769		Arthroleptidae	Leptopelis	aubryi	2013	Negative			Cameroon	Southwest	Small Koto, flooded bamboo grove and small pond
CAS 253851		Arthroleptidae	Leptopelis	aubryi	2013	Negative			Cameroon	Littoral	Manjo Area, Manten, highway roadside ditches
CAS 253852		Arthroleptidae	Leptopelis	aubryi	2013	Negative			Cameroon	Littoral	Manjo Area, Manten, highway roadside ditches
CAS 253853		Arthroleptidae	Leptopelis	aubryi	2013	Negative			Cameroon	Littoral	Manjo Area, Manten, highway roadside ditches
CAS 253969		Arthroleptidae	Leptopelis	aubryi	2013	Negative			Cameroon	Littoral	Manjo Area, Manten, marsh and slow stream in banana plantation
CAS 253970		Arthroleptidae	Leptopelis	aubryi	2013	Negative			Cameroon	Littoral	Manjo Area, Manten, marsh and slow stream in banana plantation
CAS 253309		Arthroleptidae	Leptopelis	aubryi	2013	Positive	7.88	0.0985	Cameroon	East	Zoulabot II, community forest site 1
CAS 253310		Arthroleptidae	Leptopelis	aubryi	2013	Positive	3.8	0.0475	Cameroon	East	Zoulabot II, community forest site 1
CAS 253756		Arthroleptidae	Leptopelis	aubryi	2013	Positive	9.44	0.118	Cameroon	Southwest	Small Koto, village area
CAS 253770		Arthroleptidae	Leptopelis	aubryi	2013	Positive	29102.4	363.78	Cameroon	Southwest	Small Koto, flooded bamboo grove and small pond
CAS 253810		Arthroleptidae	Leptopelis	aubryi	2013	Positive	964.8	12.06	Cameroon	Southwest	Small Koto, small waterfall area
CAS 253971		Arthroleptidae	Leptopelis	aubryi	2013	Positive	86.4	1.08	Cameroon	Littoral	Manjo Area, Manten, marsh and slow stream in banana plantation
CAS 253972		Arthroleptidae	Leptopelis	aubryi	2013	Positive	2255.2	28.19	Cameroon	Littoral	Manjo Area, Manten, marsh and slow stream in banana plantation
CAS 253973		Arthroleptidae	Leptopelis	aubryi	2013	Positive	112	1.4	Cameroon	Littoral	Manjo Area, Manten, marsh and slow stream in banana plantation
CAS 253517		Arthroleptidae	Leptopelis	aubryioides	2013	Negative			Cameroon	South	Mekas, Dja Reserve, Forest stream near camp
CAS 253518		Arthroleptidae	Leptopelis	aubryioides	2013	Negative			Cameroon	South	Mekas, Dja Reserve, Forest stream near camp
CAS 253540		Arthroleptidae	Leptopelis	aubryioides	2013	Negative			Cameroon	South	Mekas, Dja Reserve, large pool at entrance of disturbed secondary forest
CAS 253546		Arthroleptidae	Leptopelis	aubryioides	2013	Negative			Cameroon	South	Mekas, Dja Reserve, Forest stream near camp
CAS 253560		Arthroleptidae	Leptopelis	aubryioides	2013	Negative			Cameroon	South	Mekas, Dja Reserve, slow stream deep in secondary forest
CAS 253561		Arthroleptidae	Leptopelis	aubryioides	2013	Negative			Cameroon	South	Mekas, Dja Reserve, slow stream deep in secondary forest
CAS 254053		Arthroleptidae	Leptopelis	aubryioides	2013	Negative			Cameroon	Littoral	Manjo Area, Manten, large stream adjacent to banana plantation
CAS 253516		Arthroleptidae	Leptopelis	aubryoides	2013	Negative			Cameroon	South	Mekas, Dja Reserve, Forest stream near camp
CAS 253559		Arthroleptidae	Leptopelis	aubryoides	2013	Negative			Cameroon	South	Mekas, Dja Reserve, slow stream deep in secondary forest
CAS 253605		Arthroleptidae	Leptopelis	aubryoides	2013	Negative			Cameroon	South	Mekas, Dja Reserve, forest path to the far large pool
CAS 253372		Arthroleptidae	Leptopelis	boulengeri	2013	Negative			Cameroon	East	Mebam, community forest slow stream site 1
CAS 253497		Arthroleptidae	Leptopelis	boulengeri	2013	Negative			Cameroon	South	Mekas, Dja Reserve, Forest Path
CAS 253529		Arthroleptidae	Leptopelis	boulengeri	2013	Negative			Cameroon	South	Mekas, Dja Reserve, raffia palm stream in secondary forest
CAS 253771		Arthroleptidae	Leptopelis	boulengeri	2013	Positive	264	3.3	Cameroon	Southwest	Small Koto, flooded bamboo grove and small pond
CAS 253772		Arthroleptidae	Leptopelis	boulengeri	2013	Positive	66.24	0.828	Cameroon	Southwest	Small Koto, flooded bamboo grove and small pond
CAS 253773		Arthroleptidae	Leptopelis	boulengeri	2013	Positive	17.6	0.22	Cameroon	Southwest	Small Koto, flooded bamboo grove and small pond
CAS 253980		Arthroleptidae	Leptopelis	boulengeri	2013	Positive	3.056	0.0382	Cameroon	Littoral	Manjo Area, Manten, marsh and slow stream in banana plantation
CAS 254095		Arthroleptidae	Leptopelis	boulengeri	2013	Positive	4748	59.35	Cameroon	Southwest	Ekenzu, Large stream
CAS 254113		Arthroleptidae	Leptopelis	brevirostris	2013	Positive	0.01072	0.000134	Cameroon	Southwest	Edib Village, watering hole and small stream
CAS 253557		Arthroleptidae	Leptopelis	calcaratus	2013	Negative			Cameroon	South	Mekas, Dja Reserve, slow stream deep in secondary forest
CAS 253558		Arthroleptidae	Leptopelis	calcaratus	2013	Negative			Cameroon	South	Mekas, Dja Reserve, slow stream deep in secondary forest
CAS 253579		Arthroleptidae	Leptopelis	calcaratus	2013	Negative			Cameroon	South	Mekas, Dja Reserve, forest far large pool
CAS 253599		Arthroleptidae	Leptopelis	calcaratus	2013	Negative			Cameroon	South	Mekas, Dja Reserve, Forest stream near camp
CAS 253600		Arthroleptidae	Leptopelis	calcaratus	2013	Negative			Cameroon	South	Mekas, Dja Reserve, Forest stream near camp
CAS 253816		Arthroleptidae	Leptopelis	calcaratus	2013	Negative			Cameroon	Littoral	Manengouba II, Village spring
CAS 253981		Arthroleptidae	Leptopelis	calcaratus	2013	Negative			Cameroon	Littoral	Manjo Area, Manten, marsh and slow stream in banana plantation
CAS 254110		Arthroleptidae	Leptopelis	calcaratus	2013	Negative			Cameroon	Southwest	Edib Village, watering hole and small stream
CAS 253817		Arthroleptidae	Leptopelis	calcaratus	2013	Positive	6.552	0.0819	Cameroon	Littoral	Manengouba II, Village spring
CAS 253818		Arthroleptidae	Leptopelis	calcaratus	2013	Positive	20.24	0.253	Cameroon	Littoral	Manengouba II, Village spring
CAS 253819		Arthroleptidae	Leptopelis	calcaratus	2013	Positive	100.8	1.26	Cameroon	Littoral	Manengouba II, Village spring
CAS 253820		Arthroleptidae	Leptopelis	calcaratus	2013	Positive	50.64	0.633	Cameroon	Littoral	Manengouba II, Village spring
CAS 254108		Arthroleptidae	Leptopelis	calcaratus	2013	Positive	34.08	0.426	Cameroon	Southwest	Edib Village, watering hole and small stream
CAS 254109		Arthroleptidae	Leptopelis	calcaratus	2013	Positive	0.0184	0.00023	Cameroon	Southwest	Edib Village, watering hole and small stream
CAS 254111		Arthroleptidae	Leptopelis	calcaratus	2013	Positive	0.26	0.00325	Cameroon	Southwest	Edib Village, watering hole and small stream
CAS 254112		Arthroleptidae	Leptopelis	calcaratus	2013	Positive	1.344	0.0168	Cameroon	Southwest	Edib Village, watering hole and small stream
CAS 254127		Arthroleptidae	Leptopelis	calcaratus	2013	Positive	0.1168	0.00146	Cameroon	Southwest	Edib Village, Large stream
CAS 254128		Arthroleptidae	Leptopelis	calcaratus	2013	Positive	2715.2	33.94	Cameroon	Southwest	Edib Village, Large stream
CAS 254129		Arthroleptidae	Leptopelis	calcaratus	2013	Positive	2243.2	28.04	Cameroon	Southwest	Edib Village, Large stream
CAS 254130		Arthroleptidae	Leptopelis	calcaratus	2013	Positive	23.04	0.288	Cameroon	Southwest	Edib Village, Large stream
CAS 253386		Arthroleptidae	Leptopelis	millsoni	2013	Negative			Cameroon	East	Ngoyla, community forest river banks
CAS 253388		Arthroleptidae	Leptopelis	millsoni	2013	Negative			Cameroon	East	Ngoyla, community forest river banks
CAS 253580		Arthroleptidae	Leptopelis	millsoni	2013	Negative			Cameroon	South	Mekas, Dja Reserve, forest far large pool
CAS 253581		Arthroleptidae	Leptopelis	millsoni	2013	Negative			Cameroon	South	Mekas, Dja Reserve, forest far large pool
CAS 253582		Arthroleptidae	Leptopelis	millsoni	2013	Negative			Cameroon	South	Mekas, Dja Reserve, forest far large pool
CAS 255075		Arthroleptidae	Leptopelis	millsoni	2013	Negative			Cameroon	East	Ngoyla, community forest river banks
CAS 255076		Arthroleptidae	Leptopelis	millsoni	2013	Negative			Cameroon	East	Ngoyla, community forest river banks
CAS 255078		Arthroleptidae	Leptopelis	millsoni	2013	Negative			Cameroon	East	Ngoyla, community forest river banks
CAS 255079		Arthroleptidae	Leptopelis	millsoni	2013	Negative			Cameroon	East	Ngoyla, community forest river banks
CAS 255080		Arthroleptidae	Leptopelis	millsoni	2013	Negative			Cameroon	East	Ngoyla, community forest river banks
CAS 255081		Arthroleptidae	Leptopelis	millsoni	2013	Negative			Cameroon	East	Ngoyla, community forest river banks
CAS 255082		Arthroleptidae	Leptopelis	millsoni	2013	Negative			Cameroon	East	Ngoyla, community forest river banks
CAS 255077		Arthroleptidae	Leptopelis	millsoni	2013	Positive	1.896	0.0237	Cameroon	East	Ngoyla, community forest river banks
CAS 253387		Arthroleptidae	Leptopelis	modestus	2013	Negative			Cameroon	East	Ngoyla, community forest river banks
CAS 253562		Arthroleptidae	Leptopelis	modestus	2013	Negative			Cameroon	South	Mekas, Dja Reserve, slow stream deep in secondary forest
CAS 253606		Arthroleptidae	Leptopelis	modestus	2013	Negative			Cameroon	South	Mekas, Dja Reserve, forest path to the far large pool
CAS 253614		Arthroleptidae	Leptopelis	nordequatorialis	2013	Negative			Cameroon	Northwest	Bamenda, Akum-Santa area, 'ATSDA CIG Fish Project' fish ponds and marsh
CAS 253613		Arthroleptidae	Leptopelis	nordequatorialis	2013	Positive	2725.6	34.07	Cameroon	Northwest	Bamenda, Akum-Santa area, 'ATSDA CIG Fish Project' fish ponds and marsh
CAS 253326		Arthroleptidae	Leptopelis	notatus	2013	Negative			Cameroon	East	Doumzok, community forest pools
CAS 253338		Arthroleptidae	Leptopelis	notatus	2013	Negative			Cameroon	East	Doumzok, community forest path to swampy area site 1
CAS 253530		Arthroleptidae	Leptopelis	notatus	2013	Negative			Cameroon	South	Mekas, Dja Reserve, raffia palm stream in secondary forest
CAS 253554		Arthroleptidae	Leptopelis	notatus	2013	Negative			Cameroon	South	Mekas, Dja Reserve, campsite, brought by locals
CAS 253325		Arthroleptidae	Leptopelis	notatus	2013	Positive	624.8	7.81	Cameroon	East	Doumzok, community forest pools
CAS 253513		Arthroleptidae	Leptopelis	ocellatus	2013	Negative			Cameroon	South	Mekas, Dja Reserve, Forest stream near camp
CAS 253514		Arthroleptidae	Leptopelis	ocellatus	2013	Negative			Cameroon	South	Mekas, Dja Reserve, Forest stream near camp
CAS 253515		Arthroleptidae	Leptopelis	ocellatus	2013	Negative			Cameroon	South	Mekas, Dja Reserve, Forest stream near camp
CAS 253544		Arthroleptidae	Leptopelis	ocellatus	2013	Negative			Cameroon	South	Mekas, Dja Reserve, Forest stream near camp
CAS 253545		Arthroleptidae	Leptopelis	ocellatus	2013	Negative			Cameroon	South	Mekas, Dja Reserve, Forest stream near camp
CAS 253598		Arthroleptidae	Leptopelis	ocellatus	2013	Negative			Cameroon	South	Mekas, Dja Reserve, Forest stream near camp
CAS 253838		Arthroleptidae	Leptopelis	rufus	2013	Negative			Cameroon	Littoral	Manengouba II, large stream
CAS 254042		Arthroleptidae	Leptopelis	rufus	2013	Negative			Cameroon	Littoral	Manjo Area, Manten, marsh and slow stream in banana plantation
CAS 254049		Arthroleptidae	Leptopelis	rufus	2013	Negative			Cameroon	Littoral	Manjo Area, Manten, large stream adjacent to banana plantation
CAS 254050		Arthroleptidae	Leptopelis	rufus	2013	Negative			Cameroon	Littoral	Manjo Area, Manten, large stream adjacent to banana plantation
CAS 254051		Arthroleptidae	Leptopelis	rufus	2013	Negative			Cameroon	Littoral	Manjo Area, Manten, large stream adjacent to banana plantation
CAS 254098		Arthroleptidae	Leptopelis	rufus	2013	Negative			Cameroon	Southwest	Ekenzu, Large stream
CAS 254099		Arthroleptidae	Leptopelis	rufus	2013	Negative			Cameroon	Southwest	Ekenzu, Large stream
CAS 254132		Arthroleptidae	Leptopelis	rufus	2013	Negative			Cameroon	Southwest	Edib Village, Large stream
CAS 253836		Arthroleptidae	Leptopelis	rufus	2013	Positive	232	2.9	Cameroon	Littoral	Manengouba II, large stream
CAS 253837		Arthroleptidae	Leptopelis	rufus	2013	Positive	5.672	0.0709	Cameroon	Littoral	Manengouba II, large stream
CAS 253839		Arthroleptidae	Leptopelis	rufus	2013	Positive	3388	42.35	Cameroon	Littoral	Manengouba II, large stream
CAS 254043		Arthroleptidae	Leptopelis	rufus	2013	Positive	0.2864	0.00358	Cameroon	Littoral	Manjo Area, Manten, marsh and slow stream in banana plantation
CAS 254044		Arthroleptidae	Leptopelis	rufus	2013	Positive	122.4	1.53	Cameroon	Littoral	Manjo Area, Manten, marsh and slow stream in banana plantation
CAS 254045		Arthroleptidae	Leptopelis	rufus	2013	Positive	45.84	0.573	Cameroon	Littoral	Manjo Area, Manten, marsh and slow stream in banana plantation
CAS 254046		Arthroleptidae	Leptopelis	rufus	2013	Positive	6.512	0.0814	Cameroon	Littoral	Manjo Area, Manten, marsh and slow stream in banana plantation
CAS 254047		Arthroleptidae	Leptopelis	rufus	2013	Positive	3.904	0.0488	Cameroon	Littoral	Manjo Area, Manten, marsh and slow stream in banana plantation
CAS 254048		Arthroleptidae	Leptopelis	rufus	2013	Positive	32.32	0.404	Cameroon	Littoral	Manjo Area, Manten, marsh and slow stream in banana plantation
CAS 254100		Arthroleptidae	Leptopelis	rufus	2013	Positive	29.44	0.368	Cameroon	Southwest	Ekenzu, Large stream
CAS 254131		Arthroleptidae	Leptopelis	rufus	2013	Positive	532.8	6.66	Cameroon	Southwest	Edib Village, Large stream
CAS 254133		Arthroleptidae	Leptopelis	rufus	2013	Positive	40.24	0.503	Cameroon	Southwest	Edib Village, Large stream
CAS 253519		Arthroleptidae	Leptopelis	sp.	2013	Negative			Cameroon	South	Mekas, Dja Reserve, Forest stream near camp
CAS 253541		Arthroleptidae	Leptopelis	sp.	2013	Negative			Cameroon	South	Mekas, Dja Reserve, large pool at entrance of disturbed secondary forest
CAS 254096		Arthroleptidae	Leptopelis	sp.	2013	Negative			Cameroon	Southwest	Ekenzu, Large stream
CAS 253311		Arthroleptidae	Leptopelis	sp.	2013	Positive	3.912	0.0489	Cameroon	East	Zoulabot II, community forest site 1
CAS 254097		Arthroleptidae	Leptopelis	sp.	2013	Positive	57.36	0.717	Cameroon	Southwest	Ekenzu, Large stream
CAS 254107		Arthroleptidae	Leptopelis	sp.	2013	Positive	23.36	0.292	Cameroon	Southwest	Edib Village, watering hole and small stream
CAS 253794		Arthroleptidae	Nyctibates	corrugatus	2013	Positive	6.216	0.0777	Cameroon	Southwest	Small Koto, flooded bamboo grove and small pond
CAS 253807		Arthroleptidae	Scotobleps	gabonicus	2013	Negative			Cameroon	Southwest	Small Koto, large waterfall area
CAS 253808		Arthroleptidae	Scotobleps	gabonicus	2013	Negative			Cameroon	Southwest	Small Koto, large waterfall area
CAS 254016		Arthroleptidae	Scotobleps	gabonicus	2013	Negative			Cameroon	Littoral	Manjo Area, Manten, marsh and slow stream in banana plantation
CAS 253805		Arthroleptidae	Scotobleps	gabonicus	2013	Positive	1.24	0.0155	Cameroon	Southwest	Small Koto, large waterfall area
CAS 253806		Arthroleptidae	Scotobleps	gabonicus	2013	Positive	4.984	0.0623	Cameroon	Southwest	Small Koto, large waterfall area
CAS 253809		Arthroleptidae	Scotobleps	gabonicus	2013	Positive	1.232	0.0154	Cameroon	Southwest	Small Koto, small waterfall area
CAS 254015		Arthroleptidae	Scotobleps	gabonicus	2013	Positive	21.04	0.263	Cameroon	Littoral	Manjo Area, Manten, marsh and slow stream in banana plantation
CAS 254017		Arthroleptidae	Scotobleps	gabonicus	2013	Positive	0.006552	8.19e-05	Cameroon	Littoral	Manjo Area, Manten, marsh and slow stream in banana plantation
CAS 254018		Arthroleptidae	Scotobleps	gabonicus	2013	Positive	1288.8	16.11	Cameroon	Littoral	Manjo Area, Manten, marsh and slow stream in banana plantation
CAS 254019		Arthroleptidae	Scotobleps	gabonicus	2013	Positive	0.0612	0.000765	Cameroon	Littoral	Manjo Area, Manten, marsh and slow stream in banana plantation
CAS 253811		Arthroleptidae	Trichobatrachus	robustus	2013	Negative			Cameroon	Southwest	Small Koto, small waterfall area
CAS 254069		Arthroleptidae	Trichobatrachus	robustus	2013	Negative			Cameroon	Littoral	Manjo Area, Manten, large stream adjacent to banana plantation
CAS 254070		Arthroleptidae	Trichobatrachus	robustus	2013	Negative			Cameroon	Littoral	Manjo Area, Manten, large stream adjacent to banana plantation
CAS 254082		Arthroleptidae	Trichobatrachus	robustus	2013	Negative			Cameroon	Littoral	Manjo Area, Manten, second marsh and slow stream in banana plantation
CAS 254090		Arthroleptidae	Trichobatrachus	robustus	2013	Negative			Cameroon	Southwest	Ekenzu, Large stream
CAS 254092		Arthroleptidae	Trichobatrachus	robustus	2013	Negative			Cameroon	Southwest	Ekenzu, Large stream
CAS 254134		Arthroleptidae	Trichobatrachus	robustus	2013	Negative			Cameroon	Southwest	Ekenzu, Large stream
CAS 253821		Arthroleptidae	Trichobatrachus	robustus	2013	Positive	10.08	0.126	Cameroon	Littoral	Manengouba II, large stream
CAS 253934		Arthroleptidae	Trichobatrachus	robustus	2013	Positive	2.176	0.0272	Cameroon	Littoral	Manjo Area, Manten, marsh and slow stream in banana plantation
CAS 254091		Arthroleptidae	Trichobatrachus	robustus	2013	Positive	0.5304	0.00663	Cameroon	Southwest	Ekenzu, Large stream
CAS 254093		Arthroleptidae	Trichobatrachus	robustus	2013	Positive	0.428	0.00535	Cameroon	Southwest	Ekenzu, Large stream
CAS 254094		Arthroleptidae	Trichobatrachus	robustus	2013	Positive	0.01064	0.000133	Cameroon	Southwest	Ekenzu, Large stream
CAS 253341		Bufonidae	Amietophrynus	gracilipes	2013	Negative			Cameroon	East	Doumzok, community forest swampy area
CAS 253364		Bufonidae	Amietophrynus	gracilipes	2013	Negative			Cameroon	East	Mebam, community forest slow stream site 1
CAS 253363		Bufonidae	Amietophrynus	gracilipes	2013	Positive	351.2	4.39	Cameroon	East	Mebam, community forest slow stream site 1
CAS 253365		Bufonidae	Amietophrynus	gracilipes	2013	Positive	2170.4	27.13	Cameroon	East	Mebam, community forest slow stream site 1
CAS 253759		Bufonidae	Amietophrynus	regularis	2013	Positive	14.64	0.183	Cameroon	Southwest	Small Koto, village area
CAS 253760		Bufonidae	Amietophrynus	regularis	2013	Positive	43.12	0.539	Cameroon	Southwest	Small Koto, village area
CAS 253761		Bufonidae	Amietophrynus	regularis	2013	Positive	8.08	0.101	Cameroon	Southwest	Small Koto, village area
CAS 253762		Bufonidae	Amietophrynus	regularis	2013	Positive	1.576	0.0197	Cameroon	Southwest	Small Koto, village area
CAS 253763		Bufonidae	Amietophrynus	regularis	2013	Positive	5.28	0.066	Cameroon	Southwest	Small Koto, village area
CAS 253847		Bufonidae	Amietophrynus	regularis	2013	Positive	17.84	0.223	Cameroon	Littoral	Manengouba II, abandoned school
CAS 253848		Bufonidae	Amietophrynus	regularis	2013	Positive	0.03344	0.000418	Cameroon	Littoral	Manengouba II, abandoned school
CAS 253458		Bufonidae	Amietophrynus	sp.	2013	Negative			Cameroon	South	Sangmelima, Hotel L'afamba grounds
CAS 253459		Bufonidae	Amietophrynus	sp.	2013	Negative			Cameroon	South	Sangmelima, Hotel L'afamba grounds
CAS 254190		Bufonidae	Amietophrynus	sp.	2013	Negative			Cameroon	West	Bangoua, medium-sized stream adjacent to camp
CAS 253496		Bufonidae	Nectophryne	afra	2013	Negative			Cameroon	South	Mekas, Dja Reserve, Forest Path
CAS 253525		Dermophiidae	Geotrypetes	seraphini	2013	Negative			Cameroon	South	Mekas, Dja Reserve, caecilian plot
CAS 253854		Hyperoliidae	Afrixalus	dorsalis	2013	Negative			Cameroon	Littoral	Manjo Area, Manten, highway roadside ditches
CAS 253855		Hyperoliidae	Afrixalus	dorsalis	2013	Negative			Cameroon	Littoral	Manjo Area, Manten, highway roadside ditches
CAS 253856		Hyperoliidae	Afrixalus	dorsalis	2013	Negative			Cameroon	Littoral	Manjo Area, Manten, highway roadside ditches
CAS 253857		Hyperoliidae	Afrixalus	dorsalis	2013	Negative			Cameroon	Littoral	Manjo Area, Manten, highway roadside ditches
CAS 253858		Hyperoliidae	Afrixalus	dorsalis	2013	Negative			Cameroon	Littoral	Manjo Area, Manten, highway roadside ditches
CAS 253859		Hyperoliidae	Afrixalus	dorsalis	2013	Negative			Cameroon	Littoral	Manjo Area, Manten, highway roadside ditches
CAS 253860		Hyperoliidae	Afrixalus	dorsalis	2013	Negative			Cameroon	Littoral	Manjo Area, Manten, highway roadside ditches
CAS 253861		Hyperoliidae	Afrixalus	dorsalis	2013	Negative			Cameroon	Littoral	Manjo Area, Manten, highway roadside ditches
CAS 253862		Hyperoliidae	Afrixalus	dorsalis	2013	Negative			Cameroon	Littoral	Manjo Area, Manten, highway roadside ditches
CAS 253863		Hyperoliidae	Afrixalus	dorsalis	2013	Negative			Cameroon	Littoral	Manjo Area, Manten, highway roadside ditches
CAS 253864		Hyperoliidae	Afrixalus	dorsalis	2013	Negative			Cameroon	Littoral	Manjo Area, Manten, highway roadside ditches
CAS 253865		Hyperoliidae	Afrixalus	dorsalis	2013	Negative			Cameroon	Littoral	Manjo Area, Manten, highway roadside ditches
CAS 253866		Hyperoliidae	Afrixalus	dorsalis	2013	Negative			Cameroon	Littoral	Manjo Area, Manten, highway roadside ditches
CAS 253463		Hyperoliidae	Afrixalus	fulvovittatus	2013	Negative			Cameroon	South	Sangmelima, Hotel L'afamba grounds
CAS 253466		Hyperoliidae	Afrixalus	fulvovittatus	2013	Negative			Cameroon	South	Sangmelima, Hotel L'afamba grounds
CAS 253467		Hyperoliidae	Afrixalus	fulvovittatus	2013	Negative			Cameroon	South	Sangmelima, Hotel L'afamba grounds
CAS 253469		Hyperoliidae	Afrixalus	fulvovittatus	2013	Negative			Cameroon	South	Sangmelima, Hotel L'afamba grounds
CAS 253462		Hyperoliidae	Afrixalus	fulvovittatus	2013	Positive	222.4	2.78	Cameroon	South	Sangmelima, Hotel L'afamba grounds
CAS 253464		Hyperoliidae	Afrixalus	fulvovittatus	2013	Positive	104.8	1.31	Cameroon	South	Sangmelima, Hotel L'afamba grounds
CAS 253465		Hyperoliidae	Afrixalus	fulvovittatus	2013	Positive	4.128	0.0516	Cameroon	South	Sangmelima, Hotel L'afamba grounds
CAS 253468		Hyperoliidae	Afrixalus	fulvovittatus	2013	Positive	237.6	2.97	Cameroon	South	Sangmelima, Hotel L'afamba grounds
CAS 253470		Hyperoliidae	Afrixalus	fulvovittatus	2013	Positive	0.412	0.00515	Cameroon	South	Sangmelima, Hotel L'afamba grounds
CAS 253615		Hyperoliidae	Afrixalus	fulvovittatus	2013	Positive	20.72	0.259	Cameroon	Northwest	Bamenda, Akum-Santa area, 'ATSDA CIG Fish Project' fish ponds and marsh
CAS 253841		Hyperoliidae	Afrixalus	lacteus	2013	Positive	157.6	1.97	Cameroon	Littoral	Manengouba II, small stream
CAS 253843		Hyperoliidae	Afrixalus	lacteus	2013	Positive	49.2	0.615	Cameroon	Littoral	Manengouba II, small stream
CAS 253844		Hyperoliidae	Afrixalus	lacteus	2013	Positive	2103.2	26.29	Cameroon	Littoral	Manengouba II, small stream
CAS 253846		Hyperoliidae	Afrixalus	lacteus	2013	Positive	104	1.3	Cameroon	Littoral	Manengouba II, small stream
CAS 253850		Hyperoliidae	Afrixalus	lacteus	2013	Positive	1364.8	17.06	Cameroon	Littoral	Manengouba II, small stream
CAS 254101		Hyperoliidae	Afrixalus	lacteus	2013	Positive	5.2	0.065	Cameroon	Southwest	Edib Village, watering hole and small stream
CAS 253804		Hyperoliidae	Afrixalus	laevis	2013	Negative			Cameroon	Southwest	Small Koto, large waterfall area
CAS 253814		Hyperoliidae	Afrixalus	laevis	2013	Negative			Cameroon	Southwest	Small Koto, small waterfall area
CAS 253946		Hyperoliidae	Afrixalus	laevis	2013	Negative			Cameroon	Littoral	Manjo Area, Manten, marsh and slow stream in banana plantation
CAS 253803		Hyperoliidae	Afrixalus	laevis	2013	Positive	0.01376	0.000172	Cameroon	Southwest	Small Koto, large waterfall area
CAS 253812		Hyperoliidae	Afrixalus	laevis	2013	Positive	15.04	0.188	Cameroon	Southwest	Small Koto, small waterfall area
CAS 253813		Hyperoliidae	Afrixalus	laevis	2013	Positive	0.4024	0.00503	Cameroon	Southwest	Small Koto, small waterfall area
CAS 253842		Hyperoliidae	Afrixalus	laevis	2013	Positive	113.6	1.42	Cameroon	Littoral	Manengouba II, small stream
CAS 253845		Hyperoliidae	Afrixalus	laevis	2013	Positive	131.2	1.64	Cameroon	Littoral	Manengouba II, small stream
CAS 253323		Hyperoliidae	Afrixalus	paradorsalis	2013	Negative			Cameroon	East	Doumzok, community forest pools
CAS 253324		Hyperoliidae	Afrixalus	paradorsalis	2013	Negative			Cameroon	East	Doumzok, community forest pools
CAS 253961		Hyperoliidae	Afrixalus	paradorsalis	2013	Negative			Cameroon	Littoral	Manjo Area, Manten, marsh and slow stream in banana plantation
CAS 253962		Hyperoliidae	Afrixalus	paradorsalis	2013	Negative			Cameroon	Littoral	Manjo Area, Manten, marsh and slow stream in banana plantation
CAS 253963		Hyperoliidae	Afrixalus	paradorsalis	2013	Positive	187.2	2.34	Cameroon	Littoral	Manjo Area, Manten, marsh and slow stream in banana plantation
CAS 253964		Hyperoliidae	Afrixalus	paradorsalis	2013	Positive	74.32	0.929	Cameroon	Littoral	Manjo Area, Manten, marsh and slow stream in banana plantation
CAS 253965		Hyperoliidae	Afrixalus	paradorsalis	2013	Positive	1.552	0.0194	Cameroon	Littoral	Manjo Area, Manten, marsh and slow stream in banana plantation
CAS 254275		Hyperoliidae	Afrixalus	sp.	2013	Negative			Cameroon	Southwest	Edib Village, watering hole and small stream
CAS 253621		Hyperoliidae	Hyperolius	adametzi	2013	Positive	36.24	0.453	Cameroon	Northwest	Bamenda, Akum-Santa area, 'ATSDA CIG Fish Project' fish ponds and marsh
CAS 253622		Hyperoliidae	Hyperolius	adametzi	2013	Positive	1759.2	21.99	Cameroon	Northwest	Bamenda, Akum-Santa area, 'ATSDA CIG Fish Project' fish ponds and marsh
CAS 253623		Hyperoliidae	Hyperolius	adametzi	2013	Positive	1467.2	18.34	Cameroon	Northwest	Bamenda, Akum-Santa area, 'ATSDA CIG Fish Project' fish ponds and marsh
CAS 253624		Hyperoliidae	Hyperolius	adametzi	2013	Positive	2820	35.25	Cameroon	Northwest	Bamenda, Akum-Santa area, 'ATSDA CIG Fish Project' fish ponds and marsh
CAS 253508		Hyperoliidae	Hyperolius	bolifambae	2013	Negative			Cameroon	South	Mekas, Dja Reserve, Forest stream near camp
CAS 253509		Hyperoliidae	Hyperolius	bolifambae	2013	Negative			Cameroon	South	Mekas, Dja Reserve, Forest stream near camp
CAS 253510		Hyperoliidae	Hyperolius	bolifambae	2013	Negative			Cameroon	South	Mekas, Dja Reserve, Forest stream near camp
CAS 253511		Hyperoliidae	Hyperolius	bolifambae	2013	Negative			Cameroon	South	Mekas, Dja Reserve, Forest stream near camp
CAS 253512		Hyperoliidae	Hyperolius	bolifambae	2013	Negative			Cameroon	South	Mekas, Dja Reserve, Forest stream near camp
CAS 253542		Hyperoliidae	Hyperolius	bolifambae	2013	Negative			Cameroon	South	Mekas, Dja Reserve, Forest stream near camp
CAS 253543		Hyperoliidae	Hyperolius	bolifambae	2013	Negative			Cameroon	South	Mekas, Dja Reserve, Forest stream near camp
CAS 253593		Hyperoliidae	Hyperolius	bolifambae	2013	Negative			Cameroon	South	Mekas, Dja Reserve, Forest stream near camp
CAS 253594		Hyperoliidae	Hyperolius	bolifambae	2013	Negative			Cameroon	South	Mekas, Dja Reserve, Forest stream near camp
CAS 253595		Hyperoliidae	Hyperolius	bolifambae	2013	Negative			Cameroon	South	Mekas, Dja Reserve, Forest stream near camp
CAS 253596		Hyperoliidae	Hyperolius	bolifambae	2013	Negative			Cameroon	South	Mekas, Dja Reserve, Forest stream near camp
CAS 253884		Hyperoliidae	Hyperolius	bolifambae	2013	Negative			Cameroon	Littoral	Manjo Area, Manten, marsh and slow stream in banana plantation
CAS 253885		Hyperoliidae	Hyperolius	bolifambae	2013	Negative			Cameroon	Littoral	Manjo Area, Manten, marsh and slow stream in banana plantation
CAS 253886		Hyperoliidae	Hyperolius	bolifambae	2013	Negative			Cameroon	Littoral	Manjo Area, Manten, marsh and slow stream in banana plantation
CAS 253887		Hyperoliidae	Hyperolius	bolifambae	2013	Negative			Cameroon	Littoral	Manjo Area, Manten, marsh and slow stream in banana plantation
CAS 253883		Hyperoliidae	Hyperolius	bolifambae	2013	Positive	3.744	0.0468	Cameroon	Littoral	Manjo Area, Manten, marsh and slow stream in banana plantation
CAS 253941		Hyperoliidae	Hyperolius	camerunensis	2013	Negative			Cameroon	Littoral	Manjo Area, Manten, marsh and slow stream in banana plantation
CAS 253942		Hyperoliidae	Hyperolius	camerunensis	2013	Negative			Cameroon	Littoral	Manjo Area, Manten, marsh and slow stream in banana plantation
CAS 253943		Hyperoliidae	Hyperolius	camerunensis	2013	Negative			Cameroon	Littoral	Manjo Area, Manten, marsh and slow stream in banana plantation
CAS 254040		Hyperoliidae	Hyperolius	camerunensis	2013	Negative			Cameroon	Littoral	Manjo Area, Manten, marsh and slow stream in banana plantation
CAS 254059		Hyperoliidae	Hyperolius	camerunensis	2013	Positive	14.48	0.181	Cameroon	Littoral	Manjo Area, Manten, marsh and slow stream in banana plantation
CAS 254188		Hyperoliidae	Hyperolius	cf. riggenbachi	2013	Negative			Cameroon	West	Bangoua, medium-sized stream adjacent to camp
CAS 254185		Hyperoliidae	Hyperolius	cf. riggenbachi	2013	Positive	146.4	1.83	Cameroon	West	Bangoua, medium-sized stream adjacent to camp
CAS 254186		Hyperoliidae	Hyperolius	cf. riggenbachi	2013	Positive	464	5.8	Cameroon	West	Bangoua, medium-sized stream adjacent to camp
CAS 254187		Hyperoliidae	Hyperolius	cf. riggenbachi	2013	Positive	3.144	0.0393	Cameroon	West	Bangoua, medium-sized stream adjacent to camp
CAS 254189		Hyperoliidae	Hyperolius	cf. riggenbachi	2013	Positive	5.6	0.07	Cameroon	West	Bangoua, medium-sized stream adjacent to camp
CAS 253471		Hyperoliidae	Hyperolius	cinnamomeoventris	2013	Negative			Cameroon	South	Sangmelima, Hotel L'afamba grounds
CAS 253473		Hyperoliidae	Hyperolius	cinnamomeoventris	2013	Negative			Cameroon	South	Sangmelima, Hotel L'afamba grounds
CAS 253478		Hyperoliidae	Hyperolius	cinnamomeoventris	2013	Negative			Cameroon	South	Sangmelima, Hotel L'afamba grounds
CAS 253479		Hyperoliidae	Hyperolius	cinnamomeoventris	2013	Negative			Cameroon	South	Sangmelima, Hotel L'afamba grounds
CAS 253481		Hyperoliidae	Hyperolius	cinnamomeoventris	2013	Negative			Cameroon	South	Sangmelima, Hotel L'afamba grounds
CAS 253482		Hyperoliidae	Hyperolius	cinnamomeoventris	2013	Negative			Cameroon	South	Sangmelima, Hotel L'afamba grounds
CAS 253484		Hyperoliidae	Hyperolius	cinnamomeoventris	2013	Negative			Cameroon	South	Sangmelima, Hotel L'afamba grounds
CAS 253485		Hyperoliidae	Hyperolius	cinnamomeoventris	2013	Negative			Cameroon	South	Sangmelima, Hotel L'afamba grounds
CAS 253486		Hyperoliidae	Hyperolius	cinnamomeoventris	2013	Negative			Cameroon	South	Sangmelima, Hotel L'afamba grounds
CAS 253472		Hyperoliidae	Hyperolius	cinnamomeoventris	2013	Positive	4.296	0.0537	Cameroon	South	Sangmelima, Hotel L'afamba grounds
CAS 253474		Hyperoliidae	Hyperolius	cinnamomeoventris	2013	Positive	1.224	0.0153	Cameroon	South	Sangmelima, Hotel L'afamba grounds
CAS 253475		Hyperoliidae	Hyperolius	cinnamomeoventris	2013	Positive	2.648	0.0331	Cameroon	South	Sangmelima, Hotel L'afamba grounds
CAS 253476		Hyperoliidae	Hyperolius	cinnamomeoventris	2013	Positive	0.06816	0.000852	Cameroon	South	Sangmelima, Hotel L'afamba grounds
CAS 253477		Hyperoliidae	Hyperolius	cinnamomeoventris	2013	Positive	46.24	0.578	Cameroon	South	Sangmelima, Hotel L'afamba grounds
CAS 253480		Hyperoliidae	Hyperolius	cinnamomeoventris	2013	Positive	22.16	0.277	Cameroon	South	Sangmelima, Hotel L'afamba grounds
CAS 253483		Hyperoliidae	Hyperolius	cinnamomeoventris	2013	Positive	2.64	0.033	Cameroon	South	Sangmelima, Hotel L'afamba grounds
CAS 253868		Hyperoliidae	Hyperolius	concolor	2013	Negative			Cameroon	Littoral	Manjo Area, Manten, highway roadside ditches
CAS 253869		Hyperoliidae	Hyperolius	concolor	2013	Negative			Cameroon	Littoral	Manjo Area, Manten, highway roadside ditches
CAS 253870		Hyperoliidae	Hyperolius	concolor	2013	Negative			Cameroon	Littoral	Manjo Area, Manten, highway roadside ditches
CAS 253871		Hyperoliidae	Hyperolius	concolor	2013	Negative			Cameroon	Littoral	Manjo Area, Manten, highway roadside ditches
CAS 253872		Hyperoliidae	Hyperolius	concolor	2013	Negative			Cameroon	Littoral	Manjo Area, Manten, highway roadside ditches
CAS 253873		Hyperoliidae	Hyperolius	concolor	2013	Negative			Cameroon	Littoral	Manjo Area, Manten, highway roadside ditches
CAS 253874		Hyperoliidae	Hyperolius	concolor	2013	Negative			Cameroon	Littoral	Manjo Area, Manten, highway roadside ditches
CAS 253875		Hyperoliidae	Hyperolius	concolor	2013	Negative			Cameroon	Littoral	Manjo Area, Manten, highway roadside ditches
CAS 253914		Hyperoliidae	Hyperolius	concolor	2013	Negative			Cameroon	Littoral	Manjo Area, Manten, marsh and slow stream in banana plantation
CAS 253915		Hyperoliidae	Hyperolius	concolor	2013	Negative			Cameroon	Littoral	Manjo Area, Manten, marsh and slow stream in banana plantation
CAS 253913		Hyperoliidae	Hyperolius	concolor	2013	Positive	72.08	0.901	Cameroon	Littoral	Manjo Area, Manten, marsh and slow stream in banana plantation
CAS 253916		Hyperoliidae	Hyperolius	concolor	2013	Positive	1.088	0.0136	Cameroon	Littoral	Manjo Area, Manten, marsh and slow stream in banana plantation
CAS 253917		Hyperoliidae	Hyperolius	concolor	2013	Positive	21.12	0.264	Cameroon	Littoral	Manjo Area, Manten, marsh and slow stream in banana plantation
CAS 253991		Hyperoliidae	Hyperolius	dintelmanni	2013	Negative			Cameroon	Littoral	Manjo Area, Manten, marsh and slow stream in banana plantation
CAS 253876		Hyperoliidae	Hyperolius	fusciventris	2013	Negative			Cameroon	Littoral	Manjo Area, Manten, highway roadside ditches
CAS 253877		Hyperoliidae	Hyperolius	fusciventris	2013	Negative			Cameroon	Littoral	Manjo Area, Manten, highway roadside ditches
CAS 253992		Hyperoliidae	Hyperolius	fusciventris	2013	Negative			Cameroon	Littoral	Manjo Area, Manten, marsh and slow stream in banana plantation
CAS 253993		Hyperoliidae	Hyperolius	fusciventris	2013	Negative			Cameroon	Littoral	Manjo Area, Manten, marsh and slow stream in banana plantation
CAS 253994		Hyperoliidae	Hyperolius	fusciventris	2013	Negative			Cameroon	Littoral	Manjo Area, Manten, marsh and slow stream in banana plantation
CAS 253995		Hyperoliidae	Hyperolius	fusciventris	2013	Negative			Cameroon	Littoral	Manjo Area, Manten, marsh and slow stream in banana plantation
CAS 253531		Hyperoliidae	Hyperolius	mosaicus	2013	Negative			Cameroon	South	Mekas, Dja Reserve, "Eden" cocoa plantation
CAS 253532		Hyperoliidae	Hyperolius	mosaicus	2013	Negative			Cameroon	South	Mekas, Dja Reserve, "Eden" cocoa plantation
CAS 253533		Hyperoliidae	Hyperolius	mosaicus	2013	Negative			Cameroon	South	Mekas, Dja Reserve, "Eden" cocoa plantation
CAS 253571		Hyperoliidae	Hyperolius	mosaicus	2013	Negative			Cameroon	South	Mekas, Dja Reserve, forest path to the far large pool
CAS 253572		Hyperoliidae	Hyperolius	mosaicus	2013	Negative			Cameroon	South	Mekas, Dja Reserve, forest path to the far large pool
CAS 253573		Hyperoliidae	Hyperolius	mosaicus	2013	Negative			Cameroon	South	Mekas, Dja Reserve, forest path to the far large pool
CAS 253574		Hyperoliidae	Hyperolius	mosaicus	2013	Negative			Cameroon	South	Mekas, Dja Reserve, forest path to the far large pool
CAS 253575		Hyperoliidae	Hyperolius	mosaicus	2013	Negative			Cameroon	South	Mekas, Dja Reserve, forest path to the far large pool
CAS 253576		Hyperoliidae	Hyperolius	mosaicus	2013	Negative			Cameroon	South	Mekas, Dja Reserve, forest path to the far large pool
CAS 253577		Hyperoliidae	Hyperolius	mosaicus	2013	Negative			Cameroon	South	Mekas, Dja Reserve, forest path to the far large pool
CAS 253578		Hyperoliidae	Hyperolius	mosaicus	2013	Negative			Cameroon	South	Mekas, Dja Reserve, forest path to the far large pool
CAS 253307		Hyperoliidae	Hyperolius	ocellatus	2013	Negative			Cameroon	East	Zoulabot II, community forest site 1
CAS 253345		Hyperoliidae	Hyperolius	ocellatus	2013	Negative			Cameroon	East	Mebam, community forest slow stream site 1
CAS 253346		Hyperoliidae	Hyperolius	ocellatus	2013	Negative			Cameroon	East	Mebam, community forest slow stream site 1
CAS 253347		Hyperoliidae	Hyperolius	ocellatus	2013	Negative			Cameroon	East	Mebam, community forest slow stream site 1
CAS 253348		Hyperoliidae	Hyperolius	ocellatus	2013	Negative			Cameroon	East	Mebam, community forest slow stream site 1
CAS 253349		Hyperoliidae	Hyperolius	ocellatus	2013	Negative			Cameroon	East	Mebam, community forest slow stream site 1
CAS 253350		Hyperoliidae	Hyperolius	ocellatus	2013	Negative			Cameroon	East	Mebam, community forest slow stream site 1
CAS 253351		Hyperoliidae	Hyperolius	ocellatus	2013	Negative			Cameroon	East	Mebam, community forest slow stream site 1
CAS 253352		Hyperoliidae	Hyperolius	ocellatus	2013	Negative			Cameroon	East	Mebam, community forest slow stream site 1
CAS 253353		Hyperoliidae	Hyperolius	ocellatus	2013	Negative			Cameroon	East	Mebam, community forest slow stream site 1
CAS 253354		Hyperoliidae	Hyperolius	ocellatus	2013	Negative			Cameroon	East	Mebam, community forest slow stream site 1
CAS 253355		Hyperoliidae	Hyperolius	ocellatus	2013	Negative			Cameroon	East	Mebam, community forest slow stream site 1
CAS 253356		Hyperoliidae	Hyperolius	ocellatus	2013	Negative			Cameroon	East	Mebam, community forest slow stream site 1
CAS 253357		Hyperoliidae	Hyperolius	ocellatus	2013	Negative			Cameroon	East	Mebam, community forest slow stream site 1
CAS 253358		Hyperoliidae	Hyperolius	ocellatus	2013	Negative			Cameroon	East	Mebam, community forest slow stream site 1
CAS 253359		Hyperoliidae	Hyperolius	ocellatus	2013	Negative			Cameroon	East	Mebam, community forest slow stream site 1
CAS 253498		Hyperoliidae	Hyperolius	ocellatus	2013	Negative			Cameroon	South	Mekas, Dja Reserve, Forest stream near camp
CAS 253499		Hyperoliidae	Hyperolius	ocellatus	2013	Negative			Cameroon	South	Mekas, Dja Reserve, Forest stream near camp
CAS 253500		Hyperoliidae	Hyperolius	ocellatus	2013	Negative			Cameroon	South	Mekas, Dja Reserve, Forest stream near camp
CAS 253501		Hyperoliidae	Hyperolius	ocellatus	2013	Negative			Cameroon	South	Mekas, Dja Reserve, Forest stream near camp
CAS 253502		Hyperoliidae	Hyperolius	ocellatus	2013	Negative			Cameroon	South	Mekas, Dja Reserve, Forest stream near camp
CAS 253503		Hyperoliidae	Hyperolius	ocellatus	2013	Negative			Cameroon	South	Mekas, Dja Reserve, Forest stream near camp
CAS 253504		Hyperoliidae	Hyperolius	ocellatus	2013	Negative			Cameroon	South	Mekas, Dja Reserve, Forest stream near camp
CAS 253505		Hyperoliidae	Hyperolius	ocellatus	2013	Negative			Cameroon	South	Mekas, Dja Reserve, Forest stream near camp
CAS 253506		Hyperoliidae	Hyperolius	ocellatus	2013	Negative			Cameroon	South	Mekas, Dja Reserve, Forest stream near camp
CAS 253507		Hyperoliidae	Hyperolius	ocellatus	2013	Negative			Cameroon	South	Mekas, Dja Reserve, Forest stream near camp
CAS 253528		Hyperoliidae	Hyperolius	ocellatus	2013	Negative			Cameroon	South	Mekas, Dja Reserve, raffia palm stream in secondary forest
CAS 253551		Hyperoliidae	Hyperolius	ocellatus	2013	Negative			Cameroon	South	Mekas, Dja Reserve, Forest stream near camp
CAS 253563		Hyperoliidae	Hyperolius	ocellatus	2013	Negative			Cameroon	South	Mekas, Dja Reserve, slow stream deep in secondary forest
CAS 253564		Hyperoliidae	Hyperolius	ocellatus	2013	Negative			Cameroon	South	Mekas, Dja Reserve, slow stream deep in secondary forest
CAS 253588		Hyperoliidae	Hyperolius	ocellatus	2013	Negative			Cameroon	South	Mekas, Dja Reserve, forest far large pool
CAS 253592		Hyperoliidae	Hyperolius	ocellatus	2013	Negative			Cameroon	South	Mekas, Dja Reserve, Forest stream near camp
CAS 254057		Hyperoliidae	Hyperolius	ocellatus	2013	Negative			Cameroon	Littoral	Manjo Area, Manten, marsh and slow stream in banana plantation
CAS 254058		Hyperoliidae	Hyperolius	ocellatus	2013	Negative			Cameroon	Littoral	Manjo Area, Manten, marsh and slow stream in banana plantation
CAS 254075		Hyperoliidae	Hyperolius	ocellatus	2013	Negative			Cameroon	Littoral	Manjo Area, Manten, second marsh and slow stream in banana plantation
CAS 253302		Hyperoliidae	Hyperolius	ocellatus	2013	Positive	13.76	0.172	Cameroon	East	Zoulabot II, community forest site 1
CAS 253303		Hyperoliidae	Hyperolius	ocellatus	2013	Positive	13.12	0.164	Cameroon	East	Zoulabot II, community forest site 1
CAS 253304		Hyperoliidae	Hyperolius	ocellatus	2013	Positive	4.944	0.0618	Cameroon	East	Zoulabot II, community forest site 1
CAS 253305		Hyperoliidae	Hyperolius	ocellatus	2013	Positive	18.16	0.227	Cameroon	East	Zoulabot II, community forest site 1
CAS 253306		Hyperoliidae	Hyperolius	ocellatus	2013	Positive	10.64	0.133	Cameroon	East	Zoulabot II, community forest site 1
CAS 254074		Hyperoliidae	Hyperolius	ocellatus	2013	Positive	1.496	0.0187	Cameroon	Littoral	Manjo Area, Manten, second marsh and slow stream in banana plantation
CAS 253616		Hyperoliidae	Hyperolius	riggenbachi	2013	Positive	127.2	1.59	Cameroon	Northwest	Bamenda, Akum-Santa area, 'ATSDA CIG Fish Project' fish ponds and marsh
CAS 253617		Hyperoliidae	Hyperolius	riggenbachi	2013	Positive	11504	143.8	Cameroon	Northwest	Bamenda, Akum-Santa area, 'ATSDA CIG Fish Project' fish ponds and marsh
CAS 253618		Hyperoliidae	Hyperolius	riggenbachi	2013	Positive	820.8	10.26	Cameroon	Northwest	Bamenda, Akum-Santa area, 'ATSDA CIG Fish Project' fish ponds and marsh
CAS 253619		Hyperoliidae	Hyperolius	riggenbachi	2013	Positive	278.4	3.48	Cameroon	Northwest	Bamenda, Akum-Santa area, 'ATSDA CIG Fish Project' fish ponds and marsh
CAS 253620		Hyperoliidae	Hyperolius	riggenbachi	2013	Positive	1978.4	24.73	Cameroon	Northwest	Bamenda, Akum-Santa area, 'ATSDA CIG Fish Project' fish ponds and marsh
CAS 253945		Hyperoliidae	Hyperolius	sp.	2013	Positive	2.24	0.028	Cameroon	Littoral	Manjo Area, Manten, marsh and slow stream in banana plantation
CAS 253990		Hyperoliidae	Kassina	decorata	2013	Positive	12.24	0.153	Cameroon	Littoral	Manjo Area, Manten, marsh and slow stream in banana plantation
CAS 253978		Hyperoliidae	Phlyctimantis	boulengeri	2013	Negative			Cameroon	Littoral	Manjo Area, Manten, marsh and slow stream in banana plantation
CAS 253979		Hyperoliidae	Phlyctimantis	boulengeri	2013	Negative			Cameroon	Littoral	Manjo Area, Manten, marsh and slow stream in banana plantation
CAS 254066		Petropedetidae	Petropedetes	euskircheni	2013	Negative			Cameroon	Littoral	Manjo Area, Manten, large stream adjacent to banana plantation
CAS 254067		Petropedetidae	Petropedetes	euskircheni	2013	Positive	2.944	0.0368	Cameroon	Littoral	Manjo Area, Manten, large stream adjacent to banana plantation
CAS 254068		Petropedetidae	Petropedetes	euskircheni	2013	Positive	34.88	0.436	Cameroon	Littoral	Manjo Area, Manten, large stream adjacent to banana plantation
CAS 253984		Phrynobatrachidae	Phrynobatrachus	africanus	2013	Negative			Cameroon	Littoral	Manjo Area, Manten, marsh and slow stream in banana plantation
CAS 253985		Phrynobatrachidae	Phrynobatrachus	africanus	2013	Negative			Cameroon	Littoral	Manjo Area, Manten, marsh and slow stream in banana plantation
CAS 253983		Phrynobatrachidae	Phrynobatrachus	africanus	2013	Positive	7.888	0.0986	Cameroon	Littoral	Manjo Area, Manten, marsh and slow stream in banana plantation
CAS 253791		Phrynobatrachidae	Phrynobatrachus	cf. auritus	2013	Positive	4.408	0.0551	Cameroon	Southwest	Small Koto, flooded bamboo grove and small pond
CAS 253792		Phrynobatrachidae	Phrynobatrachus	cf. auritus	2013	Positive	4.496	0.0562	Cameroon	Southwest	Small Koto, flooded bamboo grove and small pond
CAS 253793		Phrynobatrachidae	Phrynobatrachus	cf. auritus	2013	Positive	2.592	0.0324	Cameroon	Southwest	Small Koto, flooded bamboo grove and small pond
CAS 253780		Phrynobatrachidae	Phrynobatrachus	cornutus	2013	Negative			Cameroon	Southwest	Small Koto, flooded bamboo grove and small pond
CAS 253781		Phrynobatrachidae	Phrynobatrachus	cornutus	2013	Negative			Cameroon	Southwest	Small Koto, flooded bamboo grove and small pond
CAS 253782		Phrynobatrachidae	Phrynobatrachus	cornutus	2013	Negative			Cameroon	Southwest	Small Koto, flooded bamboo grove and small pond
CAS 253783		Phrynobatrachidae	Phrynobatrachus	cornutus	2013	Negative			Cameroon	Southwest	Small Koto, flooded bamboo grove and small pond
CAS 253784		Phrynobatrachidae	Phrynobatrachus	cornutus	2013	Negative			Cameroon	Southwest	Small Koto, flooded bamboo grove and small pond
CAS 253785		Phrynobatrachidae	Phrynobatrachus	cornutus	2013	Negative			Cameroon	Southwest	Small Koto, flooded bamboo grove and small pond
CAS 253786		Phrynobatrachidae	Phrynobatrachus	cornutus	2013	Negative			Cameroon	Southwest	Small Koto, flooded bamboo grove and small pond
CAS 253787		Phrynobatrachidae	Phrynobatrachus	cornutus	2013	Negative			Cameroon	Southwest	Small Koto, flooded bamboo grove and small pond
CAS 253788		Phrynobatrachidae	Phrynobatrachus	cornutus	2013	Negative			Cameroon	Southwest	Small Koto, flooded bamboo grove and small pond
CAS 253789		Phrynobatrachidae	Phrynobatrachus	cornutus	2013	Negative			Cameroon	Southwest	Small Koto, flooded bamboo grove and small pond
CAS 253790		Phrynobatrachidae	Phrynobatrachus	cornutus	2013	Negative			Cameroon	Southwest	Small Koto, flooded bamboo grove and small pond
CAS 253797		Phrynobatrachidae	Phrynobatrachus	cornutus	2013	Negative			Cameroon	Southwest	Small Koto, large waterfall area
CAS 253779		Phrynobatrachidae	Phrynobatrachus	cornutus	2013	Positive	10	0.125	Cameroon	Southwest	Small Koto, flooded bamboo grove and small pond
CAS 253339		Phrynobatrachidae	Phrynobatrachus	sp.	2013	Negative			Cameroon	East	Doumzok, community forest path to swampy area site 2
CAS 253361		Phrynobatrachidae	Phrynobatrachus	sp.	2013	Negative			Cameroon	East	Mebam, community forest slow stream site 1
CAS 253362		Phrynobatrachidae	Phrynobatrachus	sp.	2013	Negative			Cameroon	East	Mebam, community forest slow stream site 1
CAS 253377		Phrynobatrachidae	Phrynobatrachus	sp.	2013	Negative			Cameroon	East	Ngoyla, community forest river banks
CAS 253378		Phrynobatrachidae	Phrynobatrachus	sp.	2013	Negative			Cameroon	East	Ngoyla, community forest river banks
CAS 253379		Phrynobatrachidae	Phrynobatrachus	sp.	2013	Negative			Cameroon	East	Ngoyla, community forest river banks
CAS 253380		Phrynobatrachidae	Phrynobatrachus	sp.	2013	Negative			Cameroon	East	Ngoyla, community forest river banks
CAS 253522		Phrynobatrachidae	Phrynobatrachus	sp.	2013	Negative			Cameroon	South	Mekas, Dja Reserve, Forest stream near camp
CAS 253587		Pipidae	Hymenochirus	boettgeri	2013	Negative			Cameroon	South	Mekas, Dja Reserve, forest far large pool
CAS 253332		Pipidae	Xenopus	sp.	2013	Negative			Cameroon	East	Doumzok, community forest pools
CAS 253333		Pipidae	Xenopus	sp.	2013	Negative			Cameroon	East	Doumzok, community forest pools
CAS 253366		Pipidae	Xenopus	sp.	2013	Negative			Cameroon	East	Mebam, community forest slow stream site 1
CAS 253367		Pipidae	Xenopus	sp.	2013	Negative			Cameroon	East	Mebam, community forest slow stream site 1
CAS 253368		Pipidae	Xenopus	sp.	2013	Negative			Cameroon	East	Mebam, community forest slow stream site 1
CAS 253369		Pipidae	Xenopus	sp.	2013	Negative			Cameroon	East	Mebam, community forest slow stream site 1
CAS 253589		Pipidae	Xenopus	sp.	2013	Negative			Cameroon	South	Mekas, Dja Reserve, Forest stream near camp
CAS 253590		Pipidae	Xenopus	sp.	2013	Negative			Cameroon	South	Mekas, Dja Reserve, Forest stream near camp
CAS 253591		Pipidae	Xenopus	sp.	2013	Negative			Cameroon	South	Mekas, Dja Reserve, Forest stream near camp
CAS 253370		Pipidae	Xenopus	sp.	2013	Positive	0.0588	0.000735	Cameroon	East	Mebam, community forest slow stream site 1
CAS 253337		Ptychadenidae	Ptychadena	sp.	2013	Negative			Cameroon	East	Doumzok, community forest pools
CAS 253488		Ptychadenidae	Ptychadena	sp.	2013	Negative			Cameroon	South	Sangmelima, Hotel L'afamba grounds
CAS 253489		Ptychadenidae	Ptychadena	sp.	2013	Negative			Cameroon	South	Sangmelima, Hotel L'afamba grounds
CAS 253570		Ptychadenidae	Ptychadena	sp.	2013	Negative			Cameroon	South	Mekas, Dja Reserve, forest path to the far large pool
CAS 253607		Ptychadenidae	Ptychadena	sp.	2013	Negative			Cameroon	South	Mekas, Dja Reserve, forest path to the far large pool
CAS 254024		Ptychadenidae	Ptychadena	sp.	2013	Negative			Cameroon	Littoral	Manjo Area, Manten, marsh and slow stream in banana plantation
CAS 254083		Ptychadenidae	Ptychadena	sp.	2013	Negative			Cameroon	Littoral	Manjo Area, Manten, second marsh and slow stream in banana plantation
CAS 254084		Ptychadenidae	Ptychadena	sp.	2013	Negative			Cameroon	Littoral	Manjo Area, Manten, second marsh and slow stream in banana plantation
CAS 253775		Ptychadenidae	Ptychadena	sp.	2013	Positive	20.4	0.255	Cameroon	Southwest	Small Koto, flooded bamboo grove and small pond
CAS 253776		Ptychadenidae	Ptychadena	sp.	2013	Positive	96.8	1.21	Cameroon	Southwest	Small Koto, flooded bamboo grove and small pond
CAS 253777		Ptychadenidae	Ptychadena	sp.	2013	Positive	8.56	0.107	Cameroon	Southwest	Small Koto, flooded bamboo grove and small pond
CAS 253778		Ptychadenidae	Ptychadena	sp.	2013	Positive	50.64	0.633	Cameroon	Southwest	Small Koto, flooded bamboo grove and small pond
CAS 253335		Ranidae	Hylarana	albolabris	2013	Negative			Cameroon	East	Doumzok, community forest pools
CAS 253336		Ranidae	Hylarana	albolabris	2013	Negative			Cameroon	East	Doumzok, community forest pools
CAS 253342		Ranidae	Hylarana	albolabris	2013	Positive	7.52	0.094	Cameroon	East	Doumzok, community forest swampy area
CAS 253376		Ranidae	Hylarana	lepus	2013	Negative			Cameroon	East	Ngoyla, community forest river banks
CAS 253536		Ranidae	Hylarana	lepus	2013	Negative			Cameroon	South	Mekas, Dja Reserve, large pool at entrance of disturbed secondary forest
CAS 253537		Ranidae	Hylarana	lepus	2013	Negative			Cameroon	South	Mekas, Dja Reserve, large pool at entrance of disturbed secondary forest
CAS 253538		Ranidae	Hylarana	lepus	2013	Negative			Cameroon	South	Mekas, Dja Reserve, large pool at entrance of disturbed secondary forest
CAS 253539		Ranidae	Hylarana	lepus	2013	Negative			Cameroon	South	Mekas, Dja Reserve, large pool at entrance of disturbed secondary forest
CAS 253585		Ranidae	Hylarana	lepus	2013	Negative			Cameroon	South	Mekas, Dja Reserve, forest far large pool
CAS 253586		Ranidae	Hylarana	lepus	2013	Negative			Cameroon	South	Mekas, Dja Reserve, forest far large pool
CAS 253547		Ranidae	Hylarana	sp.	2013	Negative			Cameroon	South	Mekas, Dja Reserve, Forest stream near camp
CAS 253548		Ranidae	Hylarana	sp.	2013	Negative			Cameroon	South	Mekas, Dja Reserve, Forest stream near camp
CAS 253549		Ranidae	Hylarana	sp.	2013	Negative			Cameroon	South	Mekas, Dja Reserve, Forest stream near camp
CAS 253583		Ranidae	Hylarana	sp.	2013	Negative			Cameroon	South	Mekas, Dja Reserve, forest far large pool
CAS 253584		Ranidae	Hylarana	sp.	2013	Negative			Cameroon	South	Mekas, Dja Reserve, forest far large pool
CAS 253601		Ranidae	Hylarana	sp.	2013	Negative			Cameroon	South	Mekas, Dja Reserve, Forest stream near camp
CAS 253308		Ranidae	Hylarana	sp.	2013	Positive	13396	167.45	Cameroon	East	Zoulabot II, community forest site 1
CAS 253315		Ranidae	Hylarana	sp.	2013	Positive	1.88	0.0235	Cameroon	East	Zoulabot II, community forest site 2
CAS 253328		Rhacophoridae	Chiromantis	rufescens	2013	Negative			Cameroon	East	Doumzok, community forest pools
CAS 253329		Rhacophoridae	Chiromantis	rufescens	2013	Negative			Cameroon	East	Doumzok, community forest pools
CAS 253330		Rhacophoridae	Chiromantis	rufescens	2013	Negative			Cameroon	East	Doumzok, community forest pools
CAS 253331		Rhacophoridae	Chiromantis	rufescens	2013	Negative			Cameroon	East	Doumzok, community forest pools
CAS 254025		Rhacophoridae	Chiromantis	rufescens	2013	Negative			Cameroon	Littoral	Manjo Area, Manten, marsh and slow stream in banana plantation
CAS 255074		Rhacophoridae	Chiromantis	rufescens	2013	Negative			Cameroon	East	Doumzok, community forest pools
CAS 253327		Rhacophoridae	Chiromantis	rufescens	2013	Positive	0.2008	0.00251	Cameroon	East	Doumzok, community forest pools
CAS 254026		Rhacophoridae	Chiromantis	rufescens	2013	Positive	30.4	0.38	Cameroon	Littoral	Manjo Area, Manten, marsh and slow stream in banana plantation
CAS 254027		Rhacophoridae	Chiromantis	rufescens	2013	Positive	65.6	0.82	Cameroon	Littoral	Manjo Area, Manten, marsh and slow stream in banana plantation
CAS 254028		Rhacophoridae	Chiromantis	rufescens	2013	Positive	38.8	0.485	Cameroon	Littoral	Manjo Area, Manten, marsh and slow stream in banana plantation
